# Supplementary material for: Effect of foliar application of microelements on chlorophyll content, canopy architecture indicators, and physiological parameters of Hordeum vulgare L. plants
Source: PeerJ. 2025 Sep 18;13:e19966. doi: 10.7717/peerj.19966 (PMC12450369; doi:10.7717/peerj.19966)
Supplement: Supplemental Information 1 [file peerj-13-19966-s001.xlsx]

## Sheet: CCI
Date	Year	Cultivar	Fertilization	CCI
BBCH 43-45	2019	Baryłka	control	43
BBCH 43-45	2019	Baryłka	control	45.6
BBCH 43-45	2019	Baryłka	control	43.5
BBCH 43-45	2019	Baryłka	control	40.4
BBCH 43-45	2019	Baryłka	control	34.4
BBCH 43-45	2019	Baryłka	control	37.9
BBCH 43-45	2019	Baryłka	control	36.7
BBCH 43-45	2019	Baryłka	control	41.1
BBCH 43-45	2019	Baryłka	control	42.4
BBCH 43-45	2019	Baryłka	control	41.4
BBCH 43-45	2019	Baryłka	control	27.8
BBCH 43-45	2019	Baryłka	control	29.4
BBCH 43-45	2019	Baryłka	control	36.2
BBCH 43-45	2019	Baryłka	control	40.9
BBCH 43-45	2019	Baryłka	control	28.3
BBCH 43-45	2019	Baryłka	control	46.7
BBCH 43-45	2019	Baryłka	control	42.5
BBCH 43-45	2019	Baryłka	control	39.9
BBCH 43-45	2019	Baryłka	control	49.3
BBCH 43-45	2019	Baryłka	control	46.3
BBCH 43-45	2019	Baryłka	Cu	46.7
BBCH 43-45	2019	Baryłka	Cu	40.8
BBCH 43-45	2019	Baryłka	Cu	48.3
BBCH 43-45	2019	Baryłka	Cu	44.6
BBCH 43-45	2019	Baryłka	Cu	49.3
BBCH 43-45	2019	Baryłka	Cu	41.8
BBCH 43-45	2019	Baryłka	Cu	40.3
BBCH 43-45	2019	Baryłka	Cu	44.1
BBCH 43-45	2019	Baryłka	Cu	43.6
BBCH 43-45	2019	Baryłka	Cu	50.4
BBCH 43-45	2019	Baryłka	Cu	47.7
BBCH 43-45	2019	Baryłka	Cu	52.7
BBCH 43-45	2019	Baryłka	Cu	49.3
BBCH 43-45	2019	Baryłka	Cu	53.5
BBCH 43-45	2019	Baryłka	Cu	46.8
BBCH 43-45	2019	Baryłka	Cu	44.4
BBCH 43-45	2019	Baryłka	Cu	45.1
BBCH 43-45	2019	Baryłka	Cu	42.9
BBCH 43-45	2019	Baryłka	Cu	46.2
BBCH 43-45	2019	Baryłka	Cu	43.8
BBCH 43-45	2019	Baryłka	Mn	40.8
BBCH 43-45	2019	Baryłka	Mn	38.8
BBCH 43-45	2019	Baryłka	Mn	43
BBCH 43-45	2019	Baryłka	Mn	40.9
BBCH 43-45	2019	Baryłka	Mn	44.3
BBCH 43-45	2019	Baryłka	Mn	48.8
BBCH 43-45	2019	Baryłka	Mn	53.5
BBCH 43-45	2019	Baryłka	Mn	51.3
BBCH 43-45	2019	Baryłka	Mn	46.7
BBCH 43-45	2019	Baryłka	Mn	44.7
BBCH 43-45	2019	Baryłka	Mn	49.3
BBCH 43-45	2019	Baryłka	Mn	39.7
BBCH 43-45	2019	Baryłka	Mn	37.5
BBCH 43-45	2019	Baryłka	Mn	43
BBCH 43-45	2019	Baryłka	Mn	46.8
BBCH 43-45	2019	Baryłka	Mn	48.3
BBCH 43-45	2019	Baryłka	Mn	44.1
BBCH 43-45	2019	Baryłka	Mn	39.79
BBCH 43-45	2019	Baryłka	Mn	39.9
BBCH 43-45	2019	Baryłka	Mn	43.7
BBCH 43-45	2019	Baryłka	Mo	46.2
BBCH 43-45	2019	Baryłka	Mo	45.2
BBCH 43-45	2019	Baryłka	Mo	47.3
BBCH 43-45	2019	Baryłka	Mo	38.5
BBCH 43-45	2019	Baryłka	Mo	44.1
BBCH 43-45	2019	Baryłka	Mo	41
BBCH 43-45	2019	Baryłka	Mo	49.3
BBCH 43-45	2019	Baryłka	Mo	52.7
BBCH 43-45	2019	Baryłka	Mo	51
BBCH 43-45	2019	Baryłka	Mo	49.6
BBCH 43-45	2019	Baryłka	Mo	54.6
BBCH 43-45	2019	Baryłka	Mo	57.3
BBCH 43-45	2019	Baryłka	Mo	45.6
BBCH 43-45	2019	Baryłka	Mo	47
BBCH 43-45	2019	Baryłka	Mo	51.4
BBCH 43-45	2019	Baryłka	Mo	45.5
BBCH 43-45	2019	Baryłka	Mo	40.9
BBCH 43-45	2019	Baryłka	Mo	41.4
BBCH 43-45	2019	Baryłka	Mo	44.1
BBCH 43-45	2019	Baryłka	Mo	42.63
BBCH 43-45	2019	Baryłka	Zn	47.88
BBCH 43-45	2019	Baryłka	Zn	43.05
BBCH 43-45	2019	Baryłka	Zn	54.915
BBCH 43-45	2019	Baryłka	Zn	53.235
BBCH 43-45	2019	Baryłka	Zn	36.75
BBCH 43-45	2019	Baryłka	Zn	49.35
BBCH 43-45	2019	Baryłka	Zn	37.38
BBCH 43-45	2019	Baryłka	Zn	42.21
BBCH 43-45	2019	Baryłka	Zn	39.2
BBCH 43-45	2019	Baryłka	Zn	49.1
BBCH 43-45	2019	Baryłka	Zn	52.7
BBCH 43-45	2019	Baryłka	Zn	45.2
BBCH 43-45	2019	Baryłka	Zn	40.8
BBCH 43-45	2019	Baryłka	Zn	35.7
BBCH 43-45	2019	Baryłka	Zn	44.8
BBCH 43-45	2019	Baryłka	Zn	38.4
BBCH 43-45	2019	Baryłka	Zn	42.5
BBCH 43-45	2019	Baryłka	Zn	43
BBCH 43-45	2019	Baryłka	Zn	41.6
BBCH 43-45	2019	Baryłka	Zn	45.1
BBCH 43-45	2020	Baryłka	control	32
BBCH 43-45	2020	Baryłka	control	33
BBCH 43-45	2020	Baryłka	control	41.5
BBCH 43-45	2020	Baryłka	control	29.5
BBCH 43-45	2020	Baryłka	control	28
BBCH 43-45	2020	Baryłka	control	37.4
BBCH 43-45	2020	Baryłka	control	29
BBCH 43-45	2020	Baryłka	control	32.2
BBCH 43-45	2020	Baryłka	control	30.8
BBCH 43-45	2020	Baryłka	control	27.9
BBCH 43-45	2020	Baryłka	control	22.5
BBCH 43-45	2020	Baryłka	control	26.4
BBCH 43-45	2020	Baryłka	control	28
BBCH 43-45	2020	Baryłka	control	32.1
BBCH 43-45	2020	Baryłka	control	26.4
BBCH 43-45	2020	Baryłka	control	20.8
BBCH 43-45	2020	Baryłka	control	29.5
BBCH 43-45	2020	Baryłka	control	30.4
BBCH 43-45	2020	Baryłka	control	27.4
BBCH 43-45	2020	Baryłka	control	30.7
BBCH 43-45	2020	Baryłka	Cu	31.7
BBCH 43-45	2020	Baryłka	Cu	47.2
BBCH 43-45	2020	Baryłka	Cu	44.1
BBCH 43-45	2020	Baryłka	Cu	39.2
BBCH 43-45	2020	Baryłka	Cu	40.8
BBCH 43-45	2020	Baryłka	Cu	36.7
BBCH 43-45	2020	Baryłka	Cu	30.8
BBCH 43-45	2020	Baryłka	Cu	42.8
BBCH 43-45	2020	Baryłka	Cu	29.5
BBCH 43-45	2020	Baryłka	Cu	28.7
BBCH 43-45	2020	Baryłka	Cu	22
BBCH 43-45	2020	Baryłka	Cu	26.3
BBCH 43-45	2020	Baryłka	Cu	21.4
BBCH 43-45	2020	Baryłka	Cu	30
BBCH 43-45	2020	Baryłka	Cu	27.4
BBCH 43-45	2020	Baryłka	Cu	19.8
BBCH 43-45	2020	Baryłka	Cu	32.6
BBCH 43-45	2020	Baryłka	Cu	33.8
BBCH 43-45	2020	Baryłka	Cu	32
BBCH 43-45	2020	Baryłka	Cu	29.7
BBCH 43-45	2020	Baryłka	Mn	32.5
BBCH 43-45	2020	Baryłka	Mn	40.2
BBCH 43-45	2020	Baryłka	Mn	41.3
BBCH 43-45	2020	Baryłka	Mn	32.5
BBCH 43-45	2020	Baryłka	Mn	34.7
BBCH 43-45	2020	Baryłka	Mn	36.1
BBCH 43-45	2020	Baryłka	Mn	40.8
BBCH 43-45	2020	Baryłka	Mn	25.4
BBCH 43-45	2020	Baryłka	Mn	22.8
BBCH 43-45	2020	Baryłka	Mn	29.1
BBCH 43-45	2020	Baryłka	Mn	35.1
BBCH 43-45	2020	Baryłka	Mn	34
BBCH 43-45	2020	Baryłka	Mn	27.8
BBCH 43-45	2020	Baryłka	Mn	30.2
BBCH 43-45	2020	Baryłka	Mn	24.1
BBCH 43-45	2020	Baryłka	Mn	27.6
BBCH 43-45	2020	Baryłka	Mn	32.1
BBCH 43-45	2020	Baryłka	Mn	30.8
BBCH 43-45	2020	Baryłka	Mn	37.4
BBCH 43-45	2020	Baryłka	Mn	40.1
BBCH 43-45	2020	Baryłka	Mo	31.5
BBCH 43-45	2020	Baryłka	Mo	40.8
BBCH 43-45	2020	Baryłka	Mo	46.5
BBCH 43-45	2020	Baryłka	Mo	34.5
BBCH 43-45	2020	Baryłka	Mo	32.8
BBCH 43-45	2020	Baryłka	Mo	28.8
BBCH 43-45	2020	Baryłka	Mo	30.5
BBCH 43-45	2020	Baryłka	Mo	26.1
BBCH 43-45	2020	Baryłka	Mo	28.5
BBCH 43-45	2020	Baryłka	Mo	32.6
BBCH 43-45	2020	Baryłka	Mo	37
BBCH 43-45	2020	Baryłka	Mo	30.4
BBCH 43-45	2020	Baryłka	Mo	27.8
BBCH 43-45	2020	Baryłka	Mo	30.5
BBCH 43-45	2020	Baryłka	Mo	26
BBCH 43-45	2020	Baryłka	Mo	34.6
BBCH 43-45	2020	Baryłka	Mo	30.8
BBCH 43-45	2020	Baryłka	Mo	33.1
BBCH 43-45	2020	Baryłka	Mo	35.1
BBCH 43-45	2020	Baryłka	Mo	29.8
BBCH 43-45	2020	Baryłka	Zn	34.7
BBCH 43-45	2020	Baryłka	Zn	32
BBCH 43-45	2020	Baryłka	Zn	36.4
BBCH 43-45	2020	Baryłka	Zn	33
BBCH 43-45	2020	Baryłka	Zn	24.9
BBCH 43-45	2020	Baryłka	Zn	28.2
BBCH 43-45	2020	Baryłka	Zn	31.7
BBCH 43-45	2020	Baryłka	Zn	26.9
BBCH 43-45	2020	Baryłka	Zn	36.1
BBCH 43-45	2020	Baryłka	Zn	32.2
BBCH 43-45	2020	Baryłka	Zn	34.3
BBCH 43-45	2020	Baryłka	Zn	40.2
BBCH 43-45	2020	Baryłka	Zn	38.2
BBCH 43-45	2020	Baryłka	Zn	35.9
BBCH 43-45	2020	Baryłka	Zn	41.7
BBCH 43-45	2020	Baryłka	Zn	35.6
BBCH 43-45	2020	Baryłka	Zn	43.1
BBCH 43-45	2020	Baryłka	Zn	39
BBCH 43-45	2020	Baryłka	Zn	32.4
BBCH 43-45	2020	Baryłka	Zn	30.1
BBCH 43-45	2021	Baryłka	control	45.2
BBCH 43-45	2021	Baryłka	control	39.8
BBCH 43-45	2021	Baryłka	control	32.5
BBCH 43-45	2021	Baryłka	control	46.2
BBCH 43-45	2021	Baryłka	control	45
BBCH 43-45	2021	Baryłka	control	38.5
BBCH 43-45	2021	Baryłka	control	45
BBCH 43-45	2021	Baryłka	control	49.6
BBCH 43-45	2021	Baryłka	control	46.2
BBCH 43-45	2021	Baryłka	control	52
BBCH 43-45	2021	Baryłka	control	47.8
BBCH 43-45	2021	Baryłka	control	45.8
BBCH 43-45	2021	Baryłka	control	46
BBCH 43-45	2021	Baryłka	control	42
BBCH 43-45	2021	Baryłka	control	50.2
BBCH 43-45	2021	Baryłka	control	48.3
BBCH 43-45	2021	Baryłka	control	45.7
BBCH 43-45	2021	Baryłka	control	42.6
BBCH 43-45	2021	Baryłka	control	45
BBCH 43-45	2021	Baryłka	control	48.1
BBCH 43-45	2021	Baryłka	Cu	48.1
BBCH 43-45	2021	Baryłka	Cu	53.2
BBCH 43-45	2021	Baryłka	Cu	54
BBCH 43-45	2021	Baryłka	Cu	52.6
BBCH 43-45	2021	Baryłka	Cu	48.4
BBCH 43-45	2021	Baryłka	Cu	54.2
BBCH 43-45	2021	Baryłka	Cu	56.6
BBCH 43-45	2021	Baryłka	Cu	52.4
BBCH 43-45	2021	Baryłka	Cu	48.7
BBCH 43-45	2021	Baryłka	Cu	51.6
BBCH 43-45	2021	Baryłka	Cu	50
BBCH 43-45	2021	Baryłka	Cu	52
BBCH 43-45	2021	Baryłka	Cu	45.8
BBCH 43-45	2021	Baryłka	Cu	53.6
BBCH 43-45	2021	Baryłka	Cu	52
BBCH 43-45	2021	Baryłka	Cu	48
BBCH 43-45	2021	Baryłka	Cu	54.2
BBCH 43-45	2021	Baryłka	Cu	52
BBCH 43-45	2021	Baryłka	Cu	56.4
BBCH 43-45	2021	Baryłka	Cu	54.1
BBCH 43-45	2021	Baryłka	Mn	49.1
BBCH 43-45	2021	Baryłka	Mn	50.3
BBCH 43-45	2021	Baryłka	Mn	42.8
BBCH 43-45	2021	Baryłka	Mn	46.4
BBCH 43-45	2021	Baryłka	Mn	54.2
BBCH 43-45	2021	Baryłka	Mn	50.5
BBCH 43-45	2021	Baryłka	Mn	53.3
BBCH 43-45	2021	Baryłka	Mn	46
BBCH 43-45	2021	Baryłka	Mn	42.8
BBCH 43-45	2021	Baryłka	Mn	54
BBCH 43-45	2021	Baryłka	Mn	51.6
BBCH 43-45	2021	Baryłka	Mn	48.9
BBCH 43-45	2021	Baryłka	Mn	47
BBCH 43-45	2021	Baryłka	Mn	53.3
BBCH 43-45	2021	Baryłka	Mn	56
BBCH 43-45	2021	Baryłka	Mn	48.2
BBCH 43-45	2021	Baryłka	Mn	46.5
BBCH 43-45	2021	Baryłka	Mn	49.7
BBCH 43-45	2021	Baryłka	Mn	50.6
BBCH 43-45	2021	Baryłka	Mn	49.5
BBCH 43-45	2021	Baryłka	Mo	48.2
BBCH 43-45	2021	Baryłka	Mo	52.4
BBCH 43-45	2021	Baryłka	Mo	56
BBCH 43-45	2021	Baryłka	Mo	48.2
BBCH 43-45	2021	Baryłka	Mo	42.4
BBCH 43-45	2021	Baryłka	Mo	51.6
BBCH 43-45	2021	Baryłka	Mo	50
BBCH 43-45	2021	Baryłka	Mo	46.3
BBCH 43-45	2021	Baryłka	Mo	44.4
BBCH 43-45	2021	Baryłka	Mo	48
BBCH 43-45	2021	Baryłka	Mo	50.3
BBCH 43-45	2021	Baryłka	Mo	46.7
BBCH 43-45	2021	Baryłka	Mo	48.9
BBCH 43-45	2021	Baryłka	Mo	52.2
BBCH 43-45	2021	Baryłka	Mo	54.6
BBCH 43-45	2021	Baryłka	Mo	46.5
BBCH 43-45	2021	Baryłka	Mo	43.1
BBCH 43-45	2021	Baryłka	Mo	48.9
BBCH 43-45	2021	Baryłka	Mo	51.6
BBCH 43-45	2021	Baryłka	Mo	48.1
BBCH 43-45	2021	Baryłka	Zn	47.6
BBCH 43-45	2021	Baryłka	Zn	52.8
BBCH 43-45	2021	Baryłka	Zn	54.6
BBCH 43-45	2021	Baryłka	Zn	42.6
BBCH 43-45	2021	Baryłka	Zn	44.6
BBCH 43-45	2021	Baryłka	Zn	49
BBCH 43-45	2021	Baryłka	Zn	41.3
BBCH 43-45	2021	Baryłka	Zn	42.6
BBCH 43-45	2021	Baryłka	Zn	54
BBCH 43-45	2021	Baryłka	Zn	50
BBCH 43-45	2021	Baryłka	Zn	47.6
BBCH 43-45	2021	Baryłka	Zn	42.1
BBCH 43-45	2021	Baryłka	Zn	46.5
BBCH 43-45	2021	Baryłka	Zn	40
BBCH 43-45	2021	Baryłka	Zn	48.5
BBCH 43-45	2021	Baryłka	Zn	51.2
BBCH 43-45	2021	Baryłka	Zn	47.2
BBCH 43-45	2021	Baryłka	Zn	46.3
BBCH 43-45	2021	Baryłka	Zn	49.1
BBCH 43-45	2021	Baryłka	Zn	46.6
BBCH 43-45	2019	KWS Irina	control	37.8
BBCH 43-45	2019	KWS Irina	control	44.2
BBCH 43-45	2019	KWS Irina	control	42.9
BBCH 43-45	2019	KWS Irina	control	37.1
BBCH 43-45	2019	KWS Irina	control	33.2
BBCH 43-45	2019	KWS Irina	control	36.8
BBCH 43-45	2019	KWS Irina	control	28.9
BBCH 43-45	2019	KWS Irina	control	25.7
BBCH 43-45	2019	KWS Irina	control	31.1
BBCH 43-45	2019	KWS Irina	control	38.2
BBCH 43-45	2019	KWS Irina	control	36.7
BBCH 43-45	2019	KWS Irina	control	43.2
BBCH 43-45	2019	KWS Irina	control	40.4
BBCH 43-45	2019	KWS Irina	control	46.4
BBCH 43-45	2019	KWS Irina	control	36.8
BBCH 43-45	2019	KWS Irina	control	33.6
BBCH 43-45	2019	KWS Irina	control	42.6
BBCH 43-45	2019	KWS Irina	control	41.6
BBCH 43-45	2019	KWS Irina	control	37.8
BBCH 43-45	2019	KWS Irina	control	44.3
BBCH 43-45	2019	KWS Irina	Cu	41.1
BBCH 43-45	2019	KWS Irina	Cu	44.5
BBCH 43-45	2019	KWS Irina	Cu	38
BBCH 43-45	2019	KWS Irina	Cu	40.3
BBCH 43-45	2019	KWS Irina	Cu	41.3
BBCH 43-45	2019	KWS Irina	Cu	33.7
BBCH 43-45	2019	KWS Irina	Cu	46.5
BBCH 43-45	2019	KWS Irina	Cu	42.7
BBCH 43-45	2019	KWS Irina	Cu	49.4
BBCH 43-45	2019	KWS Irina	Cu	38.2
BBCH 43-45	2019	KWS Irina	Cu	44.7
BBCH 43-45	2019	KWS Irina	Cu	41.1
BBCH 43-45	2019	KWS Irina	Cu	30.2
BBCH 43-45	2019	KWS Irina	Cu	33
BBCH 43-45	2019	KWS Irina	Cu	35
BBCH 43-45	2019	KWS Irina	Cu	37.3
BBCH 43-45	2019	KWS Irina	Cu	43.3
BBCH 43-45	2019	KWS Irina	Cu	41.8
BBCH 43-45	2019	KWS Irina	Cu	46.2
BBCH 43-45	2019	KWS Irina	Cu	51
BBCH 43-45	2019	KWS Irina	Mn	39.4
BBCH 43-45	2019	KWS Irina	Mn	42.2
BBCH 43-45	2019	KWS Irina	Mn	30.9
BBCH 43-45	2019	KWS Irina	Mn	33.1
BBCH 43-45	2019	KWS Irina	Mn	34.6
BBCH 43-45	2019	KWS Irina	Mn	39.2
BBCH 43-45	2019	KWS Irina	Mn	43.2
BBCH 43-45	2019	KWS Irina	Mn	44.7
BBCH 43-45	2019	KWS Irina	Mn	38.3
BBCH 43-45	2019	KWS Irina	Mn	36.7
BBCH 43-45	2019	KWS Irina	Mn	30.8
BBCH 43-45	2019	KWS Irina	Mn	38.6
BBCH 43-45	2019	KWS Irina	Mn	40.9
BBCH 43-45	2019	KWS Irina	Mn	37.8
BBCH 43-45	2019	KWS Irina	Mn	34.1
BBCH 43-45	2019	KWS Irina	Mn	40.9
BBCH 43-45	2019	KWS Irina	Mn	38.6
BBCH 43-45	2019	KWS Irina	Mn	38.8
BBCH 43-45	2019	KWS Irina	Mn	41.3
BBCH 43-45	2019	KWS Irina	Mn	43
BBCH 43-45	2019	KWS Irina	Mo	43.5
BBCH 43-45	2019	KWS Irina	Mo	46.8
BBCH 43-45	2019	KWS Irina	Mo	34.1
BBCH 43-45	2019	KWS Irina	Mo	31.2
BBCH 43-45	2019	KWS Irina	Mo	48.3
BBCH 43-45	2019	KWS Irina	Mo	37.8
BBCH 43-45	2019	KWS Irina	Mo	34.4
BBCH 43-45	2019	KWS Irina	Mo	46.6
BBCH 43-45	2019	KWS Irina	Mo	49.9
BBCH 43-45	2019	KWS Irina	Mo	53.7
BBCH 43-45	2019	KWS Irina	Mo	48.6
BBCH 43-45	2019	KWS Irina	Mo	37.4
BBCH 43-45	2019	KWS Irina	Mo	39.5
BBCH 43-45	2019	KWS Irina	Mo	44.1
BBCH 43-45	2019	KWS Irina	Mo	48.4
BBCH 43-45	2019	KWS Irina	Mo	47.2
BBCH 43-45	2019	KWS Irina	Mo	42.7
BBCH 43-45	2019	KWS Irina	Mo	40.3
BBCH 43-45	2019	KWS Irina	Mo	38.5
BBCH 43-45	2019	KWS Irina	Mo	36.7
BBCH 43-45	2019	KWS Irina	Zn	43.6
BBCH 43-45	2019	KWS Irina	Zn	46.2
BBCH 43-45	2019	KWS Irina	Zn	51
BBCH 43-45	2019	KWS Irina	Zn	48.5
BBCH 43-45	2019	KWS Irina	Zn	58.8
BBCH 43-45	2019	KWS Irina	Zn	36.5
BBCH 43-45	2019	KWS Irina	Zn	34.1
BBCH 43-45	2019	KWS Irina	Zn	43
BBCH 43-45	2019	KWS Irina	Zn	40.9
BBCH 43-45	2019	KWS Irina	Zn	54.6
BBCH 43-45	2019	KWS Irina	Zn	30.3
BBCH 43-45	2019	KWS Irina	Zn	44.4
BBCH 43-45	2019	KWS Irina	Zn	36.3
BBCH 43-45	2019	KWS Irina	Zn	39.3
BBCH 43-45	2019	KWS Irina	Zn	43.8
BBCH 43-45	2019	KWS Irina	Zn	38.1
BBCH 43-45	2019	KWS Irina	Zn	33.7
BBCH 43-45	2019	KWS Irina	Zn	40.8
BBCH 43-45	2019	KWS Irina	Zn	44.6
BBCH 43-45	2019	KWS Irina	Zn	43
BBCH 43-45	2020	KWS Irina	control	45.1
BBCH 43-45	2020	KWS Irina	control	44
BBCH 43-45	2020	KWS Irina	control	50
BBCH 43-45	2020	KWS Irina	control	39.8
BBCH 43-45	2020	KWS Irina	control	46.1
BBCH 43-45	2020	KWS Irina	control	34.1
BBCH 43-45	2020	KWS Irina	control	38.2
BBCH 43-45	2020	KWS Irina	control	42.5
BBCH 43-45	2020	KWS Irina	control	46
BBCH 43-45	2020	KWS Irina	control	37.5
BBCH 43-45	2020	KWS Irina	control	32.2
BBCH 43-45	2020	KWS Irina	control	44.1
BBCH 43-45	2020	KWS Irina	control	39.8
BBCH 43-45	2020	KWS Irina	control	38.5
BBCH 43-45	2020	KWS Irina	control	31.5
BBCH 43-45	2020	KWS Irina	control	30
BBCH 43-45	2020	KWS Irina	control	38.6
BBCH 43-45	2020	KWS Irina	control	43.5
BBCH 43-45	2020	KWS Irina	control	40.2
BBCH 43-45	2020	KWS Irina	control	46.5
BBCH 43-45	2020	KWS Irina	Cu	46.8
BBCH 43-45	2020	KWS Irina	Cu	51.2
BBCH 43-45	2020	KWS Irina	Cu	54
BBCH 43-45	2020	KWS Irina	Cu	43.6
BBCH 43-45	2020	KWS Irina	Cu	38.5
BBCH 43-45	2020	KWS Irina	Cu	39
BBCH 43-45	2020	KWS Irina	Cu	47.2
BBCH 43-45	2020	KWS Irina	Cu	50.8
BBCH 43-45	2020	KWS Irina	Cu	44.6
BBCH 43-45	2020	KWS Irina	Cu	38.2
BBCH 43-45	2020	KWS Irina	Cu	32
BBCH 43-45	2020	KWS Irina	Cu	41
BBCH 43-45	2020	KWS Irina	Cu	45.1
BBCH 43-45	2020	KWS Irina	Cu	42.6
BBCH 43-45	2020	KWS Irina	Cu	39.4
BBCH 43-45	2020	KWS Irina	Cu	40.8
BBCH 43-45	2020	KWS Irina	Cu	42.6
BBCH 43-45	2020	KWS Irina	Cu	44.1
BBCH 43-45	2020	KWS Irina	Cu	38.7
BBCH 43-45	2020	KWS Irina	Cu	35.6
BBCH 43-45	2020	KWS Irina	Mn	38.2
BBCH 43-45	2020	KWS Irina	Mn	41.5
BBCH 43-45	2020	KWS Irina	Mn	36
BBCH 43-45	2020	KWS Irina	Mn	28.9
BBCH 43-45	2020	KWS Irina	Mn	31.5
BBCH 43-45	2020	KWS Irina	Mn	37
BBCH 43-45	2020	KWS Irina	Mn	43.2
BBCH 43-45	2020	KWS Irina	Mn	40.8
BBCH 43-45	2020	KWS Irina	Mn	36.1
BBCH 43-45	2020	KWS Irina	Mn	32.4
BBCH 43-45	2020	KWS Irina	Mn	35.6
BBCH 43-45	2020	KWS Irina	Mn	41.6
BBCH 43-45	2020	KWS Irina	Mn	39.2
BBCH 43-45	2020	KWS Irina	Mn	35.8
BBCH 43-45	2020	KWS Irina	Mn	32.5
BBCH 43-45	2020	KWS Irina	Mn	40.1
BBCH 43-45	2020	KWS Irina	Mn	31.8
BBCH 43-45	2020	KWS Irina	Mn	35.6
BBCH 43-45	2020	KWS Irina	Mn	37.1
BBCH 43-45	2020	KWS Irina	Mn	35
BBCH 43-45	2020	KWS Irina	Mo	35.2
BBCH 43-45	2020	KWS Irina	Mo	41.2
BBCH 43-45	2020	KWS Irina	Mo	38.2
BBCH 43-45	2020	KWS Irina	Mo	33.5
BBCH 43-45	2020	KWS Irina	Mo	32.1
BBCH 43-45	2020	KWS Irina	Mo	27.9
BBCH 43-45	2020	KWS Irina	Mo	24.8
BBCH 43-45	2020	KWS Irina	Mo	32.5
BBCH 43-45	2020	KWS Irina	Mo	36.4
BBCH 43-45	2020	KWS Irina	Mo	35
BBCH 43-45	2020	KWS Irina	Mo	41.7
BBCH 43-45	2020	KWS Irina	Mo	33.5
BBCH 43-45	2020	KWS Irina	Mo	36.7
BBCH 43-45	2020	KWS Irina	Mo	42.1
BBCH 43-45	2020	KWS Irina	Mo	41
BBCH 43-45	2020	KWS Irina	Mo	35.8
BBCH 43-45	2020	KWS Irina	Mo	32.6
BBCH 43-45	2020	KWS Irina	Mo	30.8
BBCH 43-45	2020	KWS Irina	Mo	37.4
BBCH 43-45	2020	KWS Irina	Mo	33.5
BBCH 43-45	2020	KWS Irina	Zn	36.2
BBCH 43-45	2020	KWS Irina	Zn	33
BBCH 43-45	2020	KWS Irina	Zn	29.5
BBCH 43-45	2020	KWS Irina	Zn	28
BBCH 43-45	2020	KWS Irina	Zn	36.1
BBCH 43-45	2020	KWS Irina	Zn	32.5
BBCH 43-45	2020	KWS Irina	Zn	41.5
BBCH 43-45	2020	KWS Irina	Zn	38.6
BBCH 43-45	2020	KWS Irina	Zn	35
BBCH 43-45	2020	KWS Irina	Zn	29.7
BBCH 43-45	2020	KWS Irina	Zn	38.8
BBCH 43-45	2020	KWS Irina	Zn	33.4
BBCH 43-45	2020	KWS Irina	Zn	32.6
BBCH 43-45	2020	KWS Irina	Zn	35.1
BBCH 43-45	2020	KWS Irina	Zn	38.1
BBCH 43-45	2020	KWS Irina	Zn	32
BBCH 43-45	2020	KWS Irina	Zn	35.6
BBCH 43-45	2020	KWS Irina	Zn	38.1
BBCH 43-45	2020	KWS Irina	Zn	30.5
BBCH 43-45	2020	KWS Irina	Zn	34.2
BBCH 43-45	2021	KWS Irina	control	43.6
BBCH 43-45	2021	KWS Irina	control	40.8
BBCH 43-45	2021	KWS Irina	control	38.7
BBCH 43-45	2021	KWS Irina	control	32.6
BBCH 43-45	2021	KWS Irina	control	41.5
BBCH 43-45	2021	KWS Irina	control	43.1
BBCH 43-45	2021	KWS Irina	control	36.8
BBCH 43-45	2021	KWS Irina	control	44.6
BBCH 43-45	2021	KWS Irina	control	42.8
BBCH 43-45	2021	KWS Irina	control	47.9
BBCH 43-45	2021	KWS Irina	control	48.9
BBCH 43-45	2021	KWS Irina	control	46.5
BBCH 43-45	2021	KWS Irina	control	38.1
BBCH 43-45	2021	KWS Irina	control	53.1
BBCH 43-45	2021	KWS Irina	control	34.6
BBCH 43-45	2021	KWS Irina	control	41.8
BBCH 43-45	2021	KWS Irina	control	45.2
BBCH 43-45	2021	KWS Irina	control	52.2
BBCH 43-45	2021	KWS Irina	control	50.4
BBCH 43-45	2021	KWS Irina	control	39.2
BBCH 43-45	2021	KWS Irina	Cu	44.6
BBCH 43-45	2021	KWS Irina	Cu	52.1
BBCH 43-45	2021	KWS Irina	Cu	48.5
BBCH 43-45	2021	KWS Irina	Cu	44.6
BBCH 43-45	2021	KWS Irina	Cu	38.1
BBCH 43-45	2021	KWS Irina	Cu	36.5
BBCH 43-45	2021	KWS Irina	Cu	42.9
BBCH 43-45	2021	KWS Irina	Cu	46
BBCH 43-45	2021	KWS Irina	Cu	48.5
BBCH 43-45	2021	KWS Irina	Cu	52
BBCH 43-45	2021	KWS Irina	Cu	36.1
BBCH 43-45	2021	KWS Irina	Cu	38.9
BBCH 43-45	2021	KWS Irina	Cu	44.2
BBCH 43-45	2021	KWS Irina	Cu	40.6
BBCH 43-45	2021	KWS Irina	Cu	37
BBCH 43-45	2021	KWS Irina	Cu	45.5
BBCH 43-45	2021	KWS Irina	Cu	47.1
BBCH 43-45	2021	KWS Irina	Cu	50.3
BBCH 43-45	2021	KWS Irina	Cu	48
BBCH 43-45	2021	KWS Irina	Cu	47.1
BBCH 43-45	2021	KWS Irina	Mn	45
BBCH 43-45	2021	KWS Irina	Mn	49
BBCH 43-45	2021	KWS Irina	Mn	52.2
BBCH 43-45	2021	KWS Irina	Mn	41.3
BBCH 43-45	2021	KWS Irina	Mn	36
BBCH 43-45	2021	KWS Irina	Mn	38.2
BBCH 43-45	2021	KWS Irina	Mn	40.8
BBCH 43-45	2021	KWS Irina	Mn	44.3
BBCH 43-45	2021	KWS Irina	Mn	46
BBCH 43-45	2021	KWS Irina	Mn	42.8
BBCH 43-45	2021	KWS Irina	Mn	52.4
BBCH 43-45	2021	KWS Irina	Mn	50.1
BBCH 43-45	2021	KWS Irina	Mn	49.8
BBCH 43-45	2021	KWS Irina	Mn	44.3
BBCH 43-45	2021	KWS Irina	Mn	46.1
BBCH 43-45	2021	KWS Irina	Mn	40.8
BBCH 43-45	2021	KWS Irina	Mn	37.6
BBCH 43-45	2021	KWS Irina	Mn	46.6
BBCH 43-45	2021	KWS Irina	Mn	48.7
BBCH 43-45	2021	KWS Irina	Mn	45
BBCH 43-45	2021	KWS Irina	Mo	42.8
BBCH 43-45	2021	KWS Irina	Mo	51.6
BBCH 43-45	2021	KWS Irina	Mo	52.3
BBCH 43-45	2021	KWS Irina	Mo	42
BBCH 43-45	2021	KWS Irina	Mo	49
BBCH 43-45	2021	KWS Irina	Mo	54.2
BBCH 43-45	2021	KWS Irina	Mo	50.2
BBCH 43-45	2021	KWS Irina	Mo	47
BBCH 43-45	2021	KWS Irina	Mo	44.1
BBCH 43-45	2021	KWS Irina	Mo	46.5
BBCH 43-45	2021	KWS Irina	Mo	43
BBCH 43-45	2021	KWS Irina	Mo	41.6
BBCH 43-45	2021	KWS Irina	Mo	39.7
BBCH 43-45	2021	KWS Irina	Mo	39.2
BBCH 43-45	2021	KWS Irina	Mo	42.5
BBCH 43-45	2021	KWS Irina	Mo	46.5
BBCH 43-45	2021	KWS Irina	Mo	44
BBCH 43-45	2021	KWS Irina	Mo	47.9
BBCH 43-45	2021	KWS Irina	Mo	51
BBCH 43-45	2021	KWS Irina	Mo	40.2
BBCH 43-45	2021	KWS Irina	Zn	49
BBCH 43-45	2021	KWS Irina	Zn	52
BBCH 43-45	2021	KWS Irina	Zn	51.6
BBCH 43-45	2021	KWS Irina	Zn	47.5
BBCH 43-45	2021	KWS Irina	Zn	45.8
BBCH 43-45	2021	KWS Irina	Zn	43.8
BBCH 43-45	2021	KWS Irina	Zn	50.1
BBCH 43-45	2021	KWS Irina	Zn	52
BBCH 43-45	2021	KWS Irina	Zn	49.3
BBCH 43-45	2021	KWS Irina	Zn	54
BBCH 43-45	2021	KWS Irina	Zn	50.6
BBCH 43-45	2021	KWS Irina	Zn	47
BBCH 43-45	2021	KWS Irina	Zn	48
BBCH 43-45	2021	KWS Irina	Zn	42.6
BBCH 43-45	2021	KWS Irina	Zn	48.8
BBCH 43-45	2021	KWS Irina	Zn	50.3
BBCH 43-45	2021	KWS Irina	Zn	51.6
BBCH 43-45	2021	KWS Irina	Zn	47.8
BBCH 43-45	2021	KWS Irina	Zn	48
BBCH 43-45	2021	KWS Irina	Zn	46
BBCH 43-45	2019	RGT Planet	control	41.7
BBCH 43-45	2019	RGT Planet	control	44.6
BBCH 43-45	2019	RGT Planet	control	43.2
BBCH 43-45	2019	RGT Planet	control	39.3
BBCH 43-45	2019	RGT Planet	control	35.2
BBCH 43-45	2019	RGT Planet	control	43.5
BBCH 43-45	2019	RGT Planet	control	46.2
BBCH 43-45	2019	RGT Planet	control	44.7
BBCH 43-45	2019	RGT Planet	control	41.8
BBCH 43-45	2019	RGT Planet	control	37.5
BBCH 43-45	2019	RGT Planet	control	39.4
BBCH 43-45	2019	RGT Planet	control	42
BBCH 43-45	2019	RGT Planet	control	38.7
BBCH 43-45	2019	RGT Planet	control	43.2
BBCH 43-45	2019	RGT Planet	control	45.7
BBCH 43-45	2019	RGT Planet	control	46.4
BBCH 43-45	2019	RGT Planet	control	43.6
BBCH 43-45	2019	RGT Planet	control	42.5
BBCH 43-45	2019	RGT Planet	control	41.7
BBCH 43-45	2019	RGT Planet	control	42.5
BBCH 43-45	2019	RGT Planet	Cu	43.3
BBCH 43-45	2019	RGT Planet	Cu	47.2
BBCH 43-45	2019	RGT Planet	Cu	40.5
BBCH 43-45	2019	RGT Planet	Cu	37.3
BBCH 43-45	2019	RGT Planet	Cu	33.6
BBCH 43-45	2019	RGT Planet	Cu	38.3
BBCH 43-45	2019	RGT Planet	Cu	46.4
BBCH 43-45	2019	RGT Planet	Cu	45.6
BBCH 43-45	2019	RGT Planet	Cu	54.6
BBCH 43-45	2019	RGT Planet	Cu	49.9
BBCH 43-45	2019	RGT Planet	Cu	51.4
BBCH 43-45	2019	RGT Planet	Cu	49.5
BBCH 43-45	2019	RGT Planet	Cu	47.8
BBCH 43-45	2019	RGT Planet	Cu	51
BBCH 43-45	2019	RGT Planet	Cu	45.4
BBCH 43-45	2019	RGT Planet	Cu	44.2
BBCH 43-45	2019	RGT Planet	Cu	42.5
BBCH 43-45	2019	RGT Planet	Cu	48.3
BBCH 43-45	2019	RGT Planet	Cu	45.7
BBCH 43-45	2019	RGT Planet	Cu	50.4
BBCH 43-45	2019	RGT Planet	Mn	54.6
BBCH 43-45	2019	RGT Planet	Mn	51.6
BBCH 43-45	2019	RGT Planet	Mn	46.4
BBCH 43-45	2019	RGT Planet	Mn	48.6
BBCH 43-45	2019	RGT Planet	Mn	47.8
BBCH 43-45	2019	RGT Planet	Mn	42.8
BBCH 43-45	2019	RGT Planet	Mn	48.8
BBCH 43-45	2019	RGT Planet	Mn	52.7
BBCH 43-45	2019	RGT Planet	Mn	46.8
BBCH 43-45	2019	RGT Planet	Mn	43.9
BBCH 43-45	2019	RGT Planet	Mn	47.8
BBCH 43-45	2019	RGT Planet	Mn	42.8
BBCH 43-45	2019	RGT Planet	Mn	41.4
BBCH 43-45	2019	RGT Planet	Mn	38.5
BBCH 43-45	2019	RGT Planet	Mn	48.1
BBCH 43-45	2019	RGT Planet	Mn	49.5
BBCH 43-45	2019	RGT Planet	Mn	49.2
BBCH 43-45	2019	RGT Planet	Mn	53.3
BBCH 43-45	2019	RGT Planet	Mn	47.8
BBCH 43-45	2019	RGT Planet	Mn	46.2
BBCH 43-45	2019	RGT Planet	Mo	40.9
BBCH 43-45	2019	RGT Planet	Mo	37.5
BBCH 43-45	2019	RGT Planet	Mo	44.7
BBCH 43-45	2019	RGT Planet	Mo	49.8
BBCH 43-45	2019	RGT Planet	Mo	48
BBCH 43-45	2019	RGT Planet	Mo	42.8
BBCH 43-45	2019	RGT Planet	Mo	45.7
BBCH 43-45	2019	RGT Planet	Mo	50.9
BBCH 43-45	2019	RGT Planet	Mo	46.4
BBCH 43-45	2019	RGT Planet	Mo	43.6
BBCH 43-45	2019	RGT Planet	Mo	40.5
BBCH 43-45	2019	RGT Planet	Mo	39.6
BBCH 43-45	2019	RGT Planet	Mo	42.6
BBCH 43-45	2019	RGT Planet	Mo	48.3
BBCH 43-45	2019	RGT Planet	Mo	52.9
BBCH 43-45	2019	RGT Planet	Mo	49
BBCH 43-45	2019	RGT Planet	Mo	47
BBCH 43-45	2019	RGT Planet	Mo	47.2
BBCH 43-45	2019	RGT Planet	Mo	39.4
BBCH 43-45	2019	RGT Planet	Mo	40.9
BBCH 43-45	2019	RGT Planet	Zn	59.6
BBCH 43-45	2019	RGT Planet	Zn	64.5
BBCH 43-45	2019	RGT Planet	Zn	40.5
BBCH 43-45	2019	RGT Planet	Zn	56.9
BBCH 43-45	2019	RGT Planet	Zn	57.7
BBCH 43-45	2019	RGT Planet	Zn	57
BBCH 43-45	2019	RGT Planet	Zn	54.1
BBCH 43-45	2019	RGT Planet	Zn	53.3
BBCH 43-45	2019	RGT Planet	Zn	52.1
BBCH 43-45	2019	RGT Planet	Zn	48.8
BBCH 43-45	2019	RGT Planet	Zn	50.1
BBCH 43-45	2019	RGT Planet	Zn	53.02
BBCH 43-45	2019	RGT Planet	Zn	59.3
BBCH 43-45	2019	RGT Planet	Zn	57.2
BBCH 43-45	2019	RGT Planet	Zn	53.7
BBCH 43-45	2019	RGT Planet	Zn	61.5
BBCH 43-45	2019	RGT Planet	Zn	57.3
BBCH 43-45	2019	RGT Planet	Zn	57.7
BBCH 43-45	2019	RGT Planet	Zn	61.8
BBCH 43-45	2019	RGT Planet	Zn	49.98
BBCH 43-45	2020	RGT Planet	control	32.5
BBCH 43-45	2020	RGT Planet	control	33.6
BBCH 43-45	2020	RGT Planet	control	35.8
BBCH 43-45	2020	RGT Planet	control	28.6
BBCH 43-45	2020	RGT Planet	control	24.5
BBCH 43-45	2020	RGT Planet	control	31.6
BBCH 43-45	2020	RGT Planet	control	32.5
BBCH 43-45	2020	RGT Planet	control	35
BBCH 43-45	2020	RGT Planet	control	30.9
BBCH 43-45	2020	RGT Planet	control	29.2
BBCH 43-45	2020	RGT Planet	control	33.3
BBCH 43-45	2020	RGT Planet	control	27.5
BBCH 43-45	2020	RGT Planet	control	26.2
BBCH 43-45	2020	RGT Planet	control	28
BBCH 43-45	2020	RGT Planet	control	30.6
BBCH 43-45	2020	RGT Planet	control	27.5
BBCH 43-45	2020	RGT Planet	control	38.2
BBCH 43-45	2020	RGT Planet	control	32.52
BBCH 43-45	2020	RGT Planet	control	27.6
BBCH 43-45	2020	RGT Planet	control	26
BBCH 43-45	2020	RGT Planet	Cu	32
BBCH 43-45	2020	RGT Planet	Cu	34
BBCH 43-45	2020	RGT Planet	Cu	28
BBCH 43-45	2020	RGT Planet	Cu	32.5
BBCH 43-45	2020	RGT Planet	Cu	33.3
BBCH 43-45	2020	RGT Planet	Cu	24.6
BBCH 43-45	2020	RGT Planet	Cu	37
BBCH 43-45	2020	RGT Planet	Cu	35
BBCH 43-45	2020	RGT Planet	Cu	34.1
BBCH 43-45	2020	RGT Planet	Cu	26.8
BBCH 43-45	2020	RGT Planet	Cu	27
BBCH 43-45	2020	RGT Planet	Cu	24.8
BBCH 43-45	2020	RGT Planet	Cu	34
BBCH 43-45	2020	RGT Planet	Cu	33.6
BBCH 43-45	2020	RGT Planet	Cu	30.8
BBCH 43-45	2020	RGT Planet	Cu	36.1
BBCH 43-45	2020	RGT Planet	Cu	38.5
BBCH 43-45	2020	RGT Planet	Cu	32.6
BBCH 43-45	2020	RGT Planet	Cu	30.5
BBCH 43-45	2020	RGT Planet	Cu	31.7
BBCH 43-45	2020	RGT Planet	Mn	32.5
BBCH 43-45	2020	RGT Planet	Mn	33.5
BBCH 43-45	2020	RGT Planet	Mn	28.9
BBCH 43-45	2020	RGT Planet	Mn	36.1
BBCH 43-45	2020	RGT Planet	Mn	38
BBCH 43-45	2020	RGT Planet	Mn	34.2
BBCH 43-45	2020	RGT Planet	Mn	35
BBCH 43-45	2020	RGT Planet	Mn	36.5
BBCH 43-45	2020	RGT Planet	Mn	32.1
BBCH 43-45	2020	RGT Planet	Mn	30
BBCH 43-45	2020	RGT Planet	Mn	31.5
BBCH 43-45	2020	RGT Planet	Mn	28.7
BBCH 43-45	2020	RGT Planet	Mn	30.8
BBCH 43-45	2020	RGT Planet	Mn	29.6
BBCH 43-45	2020	RGT Planet	Mn	27.7
BBCH 43-45	2020	RGT Planet	Mn	30
BBCH 43-45	2020	RGT Planet	Mn	33.6
BBCH 43-45	2020	RGT Planet	Mn	26.5
BBCH 43-45	2020	RGT Planet	Mn	28
BBCH 43-45	2020	RGT Planet	Mn	34.2
BBCH 43-45	2020	RGT Planet	Mo	39.5
BBCH 43-45	2020	RGT Planet	Mo	42.5
BBCH 43-45	2020	RGT Planet	Mo	36
BBCH 43-45	2020	RGT Planet	Mo	35.8
BBCH 43-45	2020	RGT Planet	Mo	29.5
BBCH 43-45	2020	RGT Planet	Mo	44.5
BBCH 43-45	2020	RGT Planet	Mo	46.8
BBCH 43-45	2020	RGT Planet	Mo	50.2
BBCH 43-45	2020	RGT Planet	Mo	47.8
BBCH 43-45	2020	RGT Planet	Mo	40.2
BBCH 43-45	2020	RGT Planet	Mo	36
BBCH 43-45	2020	RGT Planet	Mo	32.5
BBCH 43-45	2020	RGT Planet	Mo	41.6
BBCH 43-45	2020	RGT Planet	Mo	39.8
BBCH 43-45	2020	RGT Planet	Mo	27.8
BBCH 43-45	2020	RGT Planet	Mo	29.6
BBCH 43-45	2020	RGT Planet	Mo	31.5
BBCH 43-45	2020	RGT Planet	Mo	37.5
BBCH 43-45	2020	RGT Planet	Mo	41.5
BBCH 43-45	2020	RGT Planet	Mo	43
BBCH 43-45	2020	RGT Planet	Zn	26.5
BBCH 43-45	2020	RGT Planet	Zn	27
BBCH 43-45	2020	RGT Planet	Zn	32.5
BBCH 43-45	2020	RGT Planet	Zn	33.6
BBCH 43-45	2020	RGT Planet	Zn	38
BBCH 43-45	2020	RGT Planet	Zn	27.4
BBCH 43-45	2020	RGT Planet	Zn	31.2
BBCH 43-45	2020	RGT Planet	Zn	30
BBCH 43-45	2020	RGT Planet	Zn	28.5
BBCH 43-45	2020	RGT Planet	Zn	36
BBCH 43-45	2020	RGT Planet	Zn	35.5
BBCH 43-45	2020	RGT Planet	Zn	32
BBCH 43-45	2020	RGT Planet	Zn	41.2
BBCH 43-45	2020	RGT Planet	Zn	30.6
BBCH 43-45	2020	RGT Planet	Zn	28.9
BBCH 43-45	2020	RGT Planet	Zn	29.4
BBCH 43-45	2020	RGT Planet	Zn	30.2
BBCH 43-45	2020	RGT Planet	Zn	26.8
BBCH 43-45	2020	RGT Planet	Zn	31.5
BBCH 43-45	2020	RGT Planet	Zn	27
BBCH 43-45	2021	RGT Planet	control	43
BBCH 43-45	2021	RGT Planet	control	48.5
BBCH 43-45	2021	RGT Planet	control	42.5
BBCH 43-45	2021	RGT Planet	control	50
BBCH 43-45	2021	RGT Planet	control	47.6
BBCH 43-45	2021	RGT Planet	control	43.3
BBCH 43-45	2021	RGT Planet	control	51.6
BBCH 43-45	2021	RGT Planet	control	51
BBCH 43-45	2021	RGT Planet	control	42.9
BBCH 43-45	2021	RGT Planet	control	44.4
BBCH 43-45	2021	RGT Planet	control	45
BBCH 43-45	2021	RGT Planet	control	44.9
BBCH 43-45	2021	RGT Planet	control	46
BBCH 43-45	2021	RGT Planet	control	48.8
BBCH 43-45	2021	RGT Planet	control	53
BBCH 43-45	2021	RGT Planet	control	50.5
BBCH 43-45	2021	RGT Planet	control	42.6
BBCH 43-45	2021	RGT Planet	control	46.9
BBCH 43-45	2021	RGT Planet	control	48
BBCH 43-45	2021	RGT Planet	control	49.3
BBCH 43-45	2021	RGT Planet	Cu	46
BBCH 43-45	2021	RGT Planet	Cu	42.8
BBCH 43-45	2021	RGT Planet	Cu	51.6
BBCH 43-45	2021	RGT Planet	Cu	52
BBCH 43-45	2021	RGT Planet	Cu	54.6
BBCH 43-45	2021	RGT Planet	Cu	55
BBCH 43-45	2021	RGT Planet	Cu	48.2
BBCH 43-45	2021	RGT Planet	Cu	46.6
BBCH 43-45	2021	RGT Planet	Cu	49.6
BBCH 43-45	2021	RGT Planet	Cu	50.3
BBCH 43-45	2021	RGT Planet	Cu	51.6
BBCH 43-45	2021	RGT Planet	Cu	47.6
BBCH 43-45	2021	RGT Planet	Cu	49.6
BBCH 43-45	2021	RGT Planet	Cu	56.5
BBCH 43-45	2021	RGT Planet	Cu	52.1
BBCH 43-45	2021	RGT Planet	Cu	50.5
BBCH 43-45	2021	RGT Planet	Cu	47.1
BBCH 43-45	2021	RGT Planet	Cu	48
BBCH 43-45	2021	RGT Planet	Cu	51.3
BBCH 43-45	2021	RGT Planet	Cu	46.1
BBCH 43-45	2021	RGT Planet	Mn	44.8
BBCH 43-45	2021	RGT Planet	Mn	50.1
BBCH 43-45	2021	RGT Planet	Mn	51.3
BBCH 43-45	2021	RGT Planet	Mn	48.6
BBCH 43-45	2021	RGT Planet	Mn	54.3
BBCH 43-45	2021	RGT Planet	Mn	42
BBCH 43-45	2021	RGT Planet	Mn	44.1
BBCH 43-45	2021	RGT Planet	Mn	46.3
BBCH 43-45	2021	RGT Planet	Mn	52.2
BBCH 43-45	2021	RGT Planet	Mn	50.8
BBCH 43-45	2021	RGT Planet	Mn	49.5
BBCH 43-45	2021	RGT Planet	Mn	46.2
BBCH 43-45	2021	RGT Planet	Mn	41
BBCH 43-45	2021	RGT Planet	Mn	40.3
BBCH 43-45	2021	RGT Planet	Mn	48.9
BBCH 43-45	2021	RGT Planet	Mn	51.2
BBCH 43-45	2021	RGT Planet	Mn	53.3
BBCH 43-45	2021	RGT Planet	Mn	55
BBCH 43-45	2021	RGT Planet	Mn	48
BBCH 43-45	2021	RGT Planet	Mn	46.1
BBCH 43-45	2021	RGT Planet	Mo	49
BBCH 43-45	2021	RGT Planet	Mo	51.5
BBCH 43-45	2021	RGT Planet	Mo	47.6
BBCH 43-45	2021	RGT Planet	Mo	44.6
BBCH 43-45	2021	RGT Planet	Mo	50.2
BBCH 43-45	2021	RGT Planet	Mo	46.9
BBCH 43-45	2021	RGT Planet	Mo	41
BBCH 43-45	2021	RGT Planet	Mo	52
BBCH 43-45	2021	RGT Planet	Mo	54.3
BBCH 43-45	2021	RGT Planet	Mo	54
BBCH 43-45	2021	RGT Planet	Mo	52.2
BBCH 43-45	2021	RGT Planet	Mo	50.6
BBCH 43-45	2021	RGT Planet	Mo	48.6
BBCH 43-45	2021	RGT Planet	Mo	53.1
BBCH 43-45	2021	RGT Planet	Mo	55.2
BBCH 43-45	2021	RGT Planet	Mo	47.6
BBCH 43-45	2021	RGT Planet	Mo	49
BBCH 43-45	2021	RGT Planet	Mo	49.5
BBCH 43-45	2021	RGT Planet	Mo	50.2
BBCH 43-45	2021	RGT Planet	Mo	52
BBCH 43-45	2021	RGT Planet	Zn	51
BBCH 43-45	2021	RGT Planet	Zn	50
BBCH 43-45	2021	RGT Planet	Zn	48.6
BBCH 43-45	2021	RGT Planet	Zn	46.5
BBCH 43-45	2021	RGT Planet	Zn	44.2
BBCH 43-45	2021	RGT Planet	Zn	48.2
BBCH 43-45	2021	RGT Planet	Zn	50.1
BBCH 43-45	2021	RGT Planet	Zn	49
BBCH 43-45	2021	RGT Planet	Zn	51.2
BBCH 43-45	2021	RGT Planet	Zn	50.6
BBCH 43-45	2021	RGT Planet	Zn	43
BBCH 43-45	2021	RGT Planet	Zn	47
BBCH 43-45	2021	RGT Planet	Zn	52.1
BBCH 43-45	2021	RGT Planet	Zn	50
BBCH 43-45	2021	RGT Planet	Zn	46.6
BBCH 43-45	2021	RGT Planet	Zn	48.5
BBCH 43-45	2021	RGT Planet	Zn	52
BBCH 43-45	2021	RGT Planet	Zn	50.6
BBCH 43-45	2021	RGT Planet	Zn	48.8
BBCH 43-45	2021	RGT Planet	Zn	50.6
BBCH 50-52	2019	Baryłka	control	33.5
BBCH 50-52	2019	Baryłka	control	34.4
BBCH 50-52	2019	Baryłka	control	38.2
BBCH 50-52	2019	Baryłka	control	40.4
BBCH 50-52	2019	Baryłka	control	41.2
BBCH 50-52	2019	Baryłka	control	49.3
BBCH 50-52	2019	Baryłka	control	30.2
BBCH 50-52	2019	Baryłka	control	33.2
BBCH 50-52	2019	Baryłka	control	37.5
BBCH 50-52	2019	Baryłka	control	38.2
BBCH 50-52	2019	Baryłka	control	31.4
BBCH 50-52	2019	Baryłka	control	33.1
BBCH 50-52	2019	Baryłka	control	27.2
BBCH 50-52	2019	Baryłka	control	28.4
BBCH 50-52	2019	Baryłka	control	35.5
BBCH 50-52	2019	Baryłka	control	39.7
BBCH 50-52	2019	Baryłka	control	33.1
BBCH 50-52	2019	Baryłka	control	36.2
BBCH 50-52	2019	Baryłka	control	43.1
BBCH 50-52	2019	Baryłka	control	38.2
BBCH 50-52	2019	Baryłka	Cu	44
BBCH 50-52	2019	Baryłka	Cu	44.8
BBCH 50-52	2019	Baryłka	Cu	39
BBCH 50-52	2019	Baryłka	Cu	35
BBCH 50-52	2019	Baryłka	Cu	31
BBCH 50-52	2019	Baryłka	Cu	42.7
BBCH 50-52	2019	Baryłka	Cu	42.9
BBCH 50-52	2019	Baryłka	Cu	37.9
BBCH 50-52	2019	Baryłka	Cu	50.5
BBCH 50-52	2019	Baryłka	Cu	43.3
BBCH 50-52	2019	Baryłka	Cu	39.7
BBCH 50-52	2019	Baryłka	Cu	51.8
BBCH 50-52	2019	Baryłka	Cu	46.5
BBCH 50-52	2019	Baryłka	Cu	51.2
BBCH 50-52	2019	Baryłka	Cu	50
BBCH 50-52	2019	Baryłka	Cu	36.4
BBCH 50-52	2019	Baryłka	Cu	35.6
BBCH 50-52	2019	Baryłka	Cu	41.3
BBCH 50-52	2019	Baryłka	Cu	32.2
BBCH 50-52	2019	Baryłka	Cu	40.4
BBCH 50-52	2019	Baryłka	Mn	36.2
BBCH 50-52	2019	Baryłka	Mn	37.4
BBCH 50-52	2019	Baryłka	Mn	34.6
BBCH 50-52	2019	Baryłka	Mn	41
BBCH 50-52	2019	Baryłka	Mn	40.3
BBCH 50-52	2019	Baryłka	Mn	45.6
BBCH 50-52	2019	Baryłka	Mn	46.2
BBCH 50-52	2019	Baryłka	Mn	42.1
BBCH 50-52	2019	Baryłka	Mn	42.3
BBCH 50-52	2019	Baryłka	Mn	41.4
BBCH 50-52	2019	Baryłka	Mn	38.9
BBCH 50-52	2019	Baryłka	Mn	35.7
BBCH 50-52	2019	Baryłka	Mn	35.3
BBCH 50-52	2019	Baryłka	Mn	36.7
BBCH 50-52	2019	Baryłka	Mn	40.1
BBCH 50-52	2019	Baryłka	Mn	43.7
BBCH 50-52	2019	Baryłka	Mn	45.5
BBCH 50-52	2019	Baryłka	Mn	42.1
BBCH 50-52	2019	Baryłka	Mn	39.9
BBCH 50-52	2019	Baryłka	Mn	46.3
BBCH 50-52	2019	Baryłka	Mo	39.5
BBCH 50-52	2019	Baryłka	Mo	37.7
BBCH 50-52	2019	Baryłka	Mo	43.8
BBCH 50-52	2019	Baryłka	Mo	35.5
BBCH 50-52	2019	Baryłka	Mo	39.1
BBCH 50-52	2019	Baryłka	Mo	44
BBCH 50-52	2019	Baryłka	Mo	37.1
BBCH 50-52	2019	Baryłka	Mo	43.4
BBCH 50-52	2019	Baryłka	Mo	42.6
BBCH 50-52	2019	Baryłka	Mo	38.4
BBCH 50-52	2019	Baryłka	Mo	45.7
BBCH 50-52	2019	Baryłka	Mo	47.9
BBCH 50-52	2019	Baryłka	Mo	42.1
BBCH 50-52	2019	Baryłka	Mo	38.2
BBCH 50-52	2019	Baryłka	Mo	45.5
BBCH 50-52	2019	Baryłka	Mo	47.4
BBCH 50-52	2019	Baryłka	Mo	44.2
BBCH 50-52	2019	Baryłka	Mo	45.4
BBCH 50-52	2019	Baryłka	Mo	40
BBCH 50-52	2019	Baryłka	Mo	43.1
BBCH 50-52	2019	Baryłka	Zn	29.7
BBCH 50-52	2019	Baryłka	Zn	36.1
BBCH 50-52	2019	Baryłka	Zn	41.8
BBCH 50-52	2019	Baryłka	Zn	28.4
BBCH 50-52	2019	Baryłka	Zn	31.4
BBCH 50-52	2019	Baryłka	Zn	33.2
BBCH 50-52	2019	Baryłka	Zn	38.6
BBCH 50-52	2019	Baryłka	Zn	57.5
BBCH 50-52	2019	Baryłka	Zn	25.2
BBCH 50-52	2019	Baryłka	Zn	49.9
BBCH 50-52	2019	Baryłka	Zn	33.4
BBCH 50-52	2019	Baryłka	Zn	45.6
BBCH 50-52	2019	Baryłka	Zn	50.3
BBCH 50-52	2019	Baryłka	Zn	35.2
BBCH 50-52	2019	Baryłka	Zn	37.5
BBCH 50-52	2019	Baryłka	Zn	50.7
BBCH 50-52	2019	Baryłka	Zn	44.3
BBCH 50-52	2019	Baryłka	Zn	44.5
BBCH 50-52	2019	Baryłka	Zn	52.1
BBCH 50-52	2019	Baryłka	Zn	41.5
BBCH 50-52	2020	Baryłka	control	29.2
BBCH 50-52	2020	Baryłka	control	7.4
BBCH 50-52	2020	Baryłka	control	28.5
BBCH 50-52	2020	Baryłka	control	29.6
BBCH 50-52	2020	Baryłka	control	26.8
BBCH 50-52	2020	Baryłka	control	24.9
BBCH 50-52	2020	Baryłka	control	23.9
BBCH 50-52	2020	Baryłka	control	26.6
BBCH 50-52	2020	Baryłka	control	30.7
BBCH 50-52	2020	Baryłka	control	31
BBCH 50-52	2020	Baryłka	control	31.5
BBCH 50-52	2020	Baryłka	control	30.4
BBCH 50-52	2020	Baryłka	control	28.2
BBCH 50-52	2020	Baryłka	control	27
BBCH 50-52	2020	Baryłka	control	26.9
BBCH 50-52	2020	Baryłka	control	29.8
BBCH 50-52	2020	Baryłka	control	29.5
BBCH 50-52	2020	Baryłka	control	28.7
BBCH 50-52	2020	Baryłka	control	27.7
BBCH 50-52	2020	Baryłka	control	31.9
BBCH 50-52	2020	Baryłka	Cu	36.4
BBCH 50-52	2020	Baryłka	Cu	33.2
BBCH 50-52	2020	Baryłka	Cu	33.9
BBCH 50-52	2020	Baryłka	Cu	28.7
BBCH 50-52	2020	Baryłka	Cu	38.4
BBCH 50-52	2020	Baryłka	Cu	32.7
BBCH 50-52	2020	Baryłka	Cu	31.4
BBCH 50-52	2020	Baryłka	Cu	37.3
BBCH 50-52	2020	Baryłka	Cu	25.3
BBCH 50-52	2020	Baryłka	Cu	29.3
BBCH 50-52	2020	Baryłka	Cu	34.9
BBCH 50-52	2020	Baryłka	Cu	30.1
BBCH 50-52	2020	Baryłka	Cu	29
BBCH 50-52	2020	Baryłka	Cu	26.9
BBCH 50-52	2020	Baryłka	Cu	27.9
BBCH 50-52	2020	Baryłka	Cu	29.2
BBCH 50-52	2020	Baryłka	Cu	29.4
BBCH 50-52	2020	Baryłka	Cu	29.4
BBCH 50-52	2020	Baryłka	Cu	26.1
BBCH 50-52	2020	Baryłka	Cu	30.1
BBCH 50-52	2020	Baryłka	Mn	27.9
BBCH 50-52	2020	Baryłka	Mn	25
BBCH 50-52	2020	Baryłka	Mn	29.7
BBCH 50-52	2020	Baryłka	Mn	27.9
BBCH 50-52	2020	Baryłka	Mn	32.1
BBCH 50-52	2020	Baryłka	Mn	31.6
BBCH 50-52	2020	Baryłka	Mn	32.9
BBCH 50-52	2020	Baryłka	Mn	27.7
BBCH 50-52	2020	Baryłka	Mn	25
BBCH 50-52	2020	Baryłka	Mn	34.3
BBCH 50-52	2020	Baryłka	Mn	33.3
BBCH 50-52	2020	Baryłka	Mn	32.7
BBCH 50-52	2020	Baryłka	Mn	26.9
BBCH 50-52	2020	Baryłka	Mn	26.3
BBCH 50-52	2020	Baryłka	Mn	31.4
BBCH 50-52	2020	Baryłka	Mn	34.2
BBCH 50-52	2020	Baryłka	Mn	34.8
BBCH 50-52	2020	Baryłka	Mn	36.2
BBCH 50-52	2020	Baryłka	Mn	33.1
BBCH 50-52	2020	Baryłka	Mn	21.6
BBCH 50-52	2020	Baryłka	Mo	30.4
BBCH 50-52	2020	Baryłka	Mo	30.1
BBCH 50-52	2020	Baryłka	Mo	31.6
BBCH 50-52	2020	Baryłka	Mo	32.7
BBCH 50-52	2020	Baryłka	Mo	32.9
BBCH 50-52	2020	Baryłka	Mo	32.2
BBCH 50-52	2020	Baryłka	Mo	33
BBCH 50-52	2020	Baryłka	Mo	28.8
BBCH 50-52	2020	Baryłka	Mo	28.1
BBCH 50-52	2020	Baryłka	Mo	27.8
BBCH 50-52	2020	Baryłka	Mo	33.7
BBCH 50-52	2020	Baryłka	Mo	30.6
BBCH 50-52	2020	Baryłka	Mo	25.6
BBCH 50-52	2020	Baryłka	Mo	28.4
BBCH 50-52	2020	Baryłka	Mo	25.5
BBCH 50-52	2020	Baryłka	Mo	30.3
BBCH 50-52	2020	Baryłka	Mo	35
BBCH 50-52	2020	Baryłka	Mo	27.2
BBCH 50-52	2020	Baryłka	Mo	29.7
BBCH 50-52	2020	Baryłka	Mo	33.2
BBCH 50-52	2020	Baryłka	Zn	29.1
BBCH 50-52	2020	Baryłka	Zn	28.4
BBCH 50-52	2020	Baryłka	Zn	30.1
BBCH 50-52	2020	Baryłka	Zn	39.1
BBCH 50-52	2020	Baryłka	Zn	40.1
BBCH 50-52	2020	Baryłka	Zn	32.4
BBCH 50-52	2020	Baryłka	Zn	36.7
BBCH 50-52	2020	Baryłka	Zn	31.4
BBCH 50-52	2020	Baryłka	Zn	28.8
BBCH 50-52	2020	Baryłka	Zn	43
BBCH 50-52	2020	Baryłka	Zn	32.6
BBCH 50-52	2020	Baryłka	Zn	32.9
BBCH 50-52	2020	Baryłka	Zn	30.5
BBCH 50-52	2020	Baryłka	Zn	30.1
BBCH 50-52	2020	Baryłka	Zn	28.7
BBCH 50-52	2020	Baryłka	Zn	29.6
BBCH 50-52	2020	Baryłka	Zn	23.9
BBCH 50-52	2020	Baryłka	Zn	33.3
BBCH 50-52	2020	Baryłka	Zn	29.8
BBCH 50-52	2020	Baryłka	Zn	32.6
BBCH 50-52	2021	Baryłka	control	45
BBCH 50-52	2021	Baryłka	control	44.2
BBCH 50-52	2021	Baryłka	control	47
BBCH 50-52	2021	Baryłka	control	45.3
BBCH 50-52	2021	Baryłka	control	40
BBCH 50-52	2021	Baryłka	control	42.1
BBCH 50-52	2021	Baryłka	control	45
BBCH 50-52	2021	Baryłka	control	42.4
BBCH 50-52	2021	Baryłka	control	41.5
BBCH 50-52	2021	Baryłka	control	43.8
BBCH 50-52	2021	Baryłka	control	46.7
BBCH 50-52	2021	Baryłka	control	42.6
BBCH 50-52	2021	Baryłka	control	51.9
BBCH 50-52	2021	Baryłka	control	41.2
BBCH 50-52	2021	Baryłka	control	36.9
BBCH 50-52	2021	Baryłka	control	35.6
BBCH 50-52	2021	Baryłka	control	42.6
BBCH 50-52	2021	Baryłka	control	42.5
BBCH 50-52	2021	Baryłka	control	38.4
BBCH 50-52	2021	Baryłka	control	53.9
BBCH 50-52	2021	Baryłka	Cu	48.7
BBCH 50-52	2021	Baryłka	Cu	56
BBCH 50-52	2021	Baryłka	Cu	53.2
BBCH 50-52	2021	Baryłka	Cu	47.8
BBCH 50-52	2021	Baryłka	Cu	55.2
BBCH 50-52	2021	Baryłka	Cu	49.6
BBCH 50-52	2021	Baryłka	Cu	46.8
BBCH 50-52	2021	Baryłka	Cu	47.6
BBCH 50-52	2021	Baryłka	Cu	53
BBCH 50-52	2021	Baryłka	Cu	47.7
BBCH 50-52	2021	Baryłka	Cu	48.9
BBCH 50-52	2021	Baryłka	Cu	47.4
BBCH 50-52	2021	Baryłka	Cu	45.5
BBCH 50-52	2021	Baryłka	Cu	53
BBCH 50-52	2021	Baryłka	Cu	52.4
BBCH 50-52	2021	Baryłka	Cu	47.5
BBCH 50-52	2021	Baryłka	Cu	50.1
BBCH 50-52	2021	Baryłka	Cu	51.8
BBCH 50-52	2021	Baryłka	Cu	51.5
BBCH 50-52	2021	Baryłka	Cu	52
BBCH 50-52	2021	Baryłka	Mn	46.4
BBCH 50-52	2021	Baryłka	Mn	44.4
BBCH 50-52	2021	Baryłka	Mn	49.1
BBCH 50-52	2021	Baryłka	Mn	47.6
BBCH 50-52	2021	Baryłka	Mn	49.9
BBCH 50-52	2021	Baryłka	Mn	48.9
BBCH 50-52	2021	Baryłka	Mn	49.1
BBCH 50-52	2021	Baryłka	Mn	48.9
BBCH 50-52	2021	Baryłka	Mn	42.6
BBCH 50-52	2021	Baryłka	Mn	42.8
BBCH 50-52	2021	Baryłka	Mn	50.6
BBCH 50-52	2021	Baryłka	Mn	48.6
BBCH 50-52	2021	Baryłka	Mn	51
BBCH 50-52	2021	Baryłka	Mn	47.9
BBCH 50-52	2021	Baryłka	Mn	48
BBCH 50-52	2021	Baryłka	Mn	51.4
BBCH 50-52	2021	Baryłka	Mn	52
BBCH 50-52	2021	Baryłka	Mn	48.6
BBCH 50-52	2021	Baryłka	Mn	42.3
BBCH 50-52	2021	Baryłka	Mn	47.8
BBCH 50-52	2021	Baryłka	Mo	47.4
BBCH 50-52	2021	Baryłka	Mo	49.9
BBCH 50-52	2021	Baryłka	Mo	42.1
BBCH 50-52	2021	Baryłka	Mo	45.9
BBCH 50-52	2021	Baryłka	Mo	40.8
BBCH 50-52	2021	Baryłka	Mo	49.6
BBCH 50-52	2021	Baryłka	Mo	44
BBCH 50-52	2021	Baryłka	Mo	46.2
BBCH 50-52	2021	Baryłka	Mo	41.4
BBCH 50-52	2021	Baryłka	Mo	45.3
BBCH 50-52	2021	Baryłka	Mo	50.2
BBCH 50-52	2021	Baryłka	Mo	52.4
BBCH 50-52	2021	Baryłka	Mo	50.9
BBCH 50-52	2021	Baryłka	Mo	45.3
BBCH 50-52	2021	Baryłka	Mo	46.1
BBCH 50-52	2021	Baryłka	Mo	49.4
BBCH 50-52	2021	Baryłka	Mo	46.2
BBCH 50-52	2021	Baryłka	Mo	48.1
BBCH 50-52	2021	Baryłka	Mo	48.6
BBCH 50-52	2021	Baryłka	Mo	48.6
BBCH 50-52	2021	Baryłka	Zn	40.3
BBCH 50-52	2021	Baryłka	Zn	46.7
BBCH 50-52	2021	Baryłka	Zn	49.2
BBCH 50-52	2021	Baryłka	Zn	42.2
BBCH 50-52	2021	Baryłka	Zn	47.4
BBCH 50-52	2021	Baryłka	Zn	46.9
BBCH 50-52	2021	Baryłka	Zn	45.8
BBCH 50-52	2021	Baryłka	Zn	44.8
BBCH 50-52	2021	Baryłka	Zn	40.5
BBCH 50-52	2021	Baryłka	Zn	41.7
BBCH 50-52	2021	Baryłka	Zn	55
BBCH 50-52	2021	Baryłka	Zn	47.6
BBCH 50-52	2021	Baryłka	Zn	40
BBCH 50-52	2021	Baryłka	Zn	47.3
BBCH 50-52	2021	Baryłka	Zn	47.7
BBCH 50-52	2021	Baryłka	Zn	49.5
BBCH 50-52	2021	Baryłka	Zn	43.9
BBCH 50-52	2021	Baryłka	Zn	41.6
BBCH 50-52	2021	Baryłka	Zn	42.9
BBCH 50-52	2021	Baryłka	Zn	42.6
BBCH 50-52	2019	KWS Irina	control	38.2
BBCH 50-52	2019	KWS Irina	control	30.4
BBCH 50-52	2019	KWS Irina	control	33.9
BBCH 50-52	2019	KWS Irina	control	36.2
BBCH 50-52	2019	KWS Irina	control	38.4
BBCH 50-52	2019	KWS Irina	control	38.7
BBCH 50-52	2019	KWS Irina	control	40.6
BBCH 50-52	2019	KWS Irina	control	38.8
BBCH 50-52	2019	KWS Irina	control	37.2
BBCH 50-52	2019	KWS Irina	control	35.1
BBCH 50-52	2019	KWS Irina	control	34.5
BBCH 50-52	2019	KWS Irina	control	27.4
BBCH 50-52	2019	KWS Irina	control	33.5
BBCH 50-52	2019	KWS Irina	control	32.4
BBCH 50-52	2019	KWS Irina	control	36.2
BBCH 50-52	2019	KWS Irina	control	37.9
BBCH 50-52	2019	KWS Irina	control	27.7
BBCH 50-52	2019	KWS Irina	control	30.2
BBCH 50-52	2019	KWS Irina	control	33.3
BBCH 50-52	2019	KWS Irina	control	30.1
BBCH 50-52	2019	KWS Irina	Cu	43.6
BBCH 50-52	2019	KWS Irina	Cu	51
BBCH 50-52	2019	KWS Irina	Cu	55.8
BBCH 50-52	2019	KWS Irina	Cu	26
BBCH 50-52	2019	KWS Irina	Cu	36.8
BBCH 50-52	2019	KWS Irina	Cu	40.5
BBCH 50-52	2019	KWS Irina	Cu	39.1
BBCH 50-52	2019	KWS Irina	Cu	42.2
BBCH 50-52	2019	KWS Irina	Cu	32.5
BBCH 50-52	2019	KWS Irina	Cu	29.5
BBCH 50-52	2019	KWS Irina	Cu	48.5
BBCH 50-52	2019	KWS Irina	Cu	40.3
BBCH 50-52	2019	KWS Irina	Cu	34.5
BBCH 50-52	2019	KWS Irina	Cu	24.8
BBCH 50-52	2019	KWS Irina	Cu	26.4
BBCH 50-52	2019	KWS Irina	Cu	28.4
BBCH 50-52	2019	KWS Irina	Cu	20.8
BBCH 50-52	2019	KWS Irina	Cu	46.3
BBCH 50-52	2019	KWS Irina	Cu	43.6
BBCH 50-52	2019	KWS Irina	Cu	43.8
BBCH 50-52	2019	KWS Irina	Mn	29.7
BBCH 50-52	2019	KWS Irina	Mn	33.7
BBCH 50-52	2019	KWS Irina	Mn	16.3
BBCH 50-52	2019	KWS Irina	Mn	39
BBCH 50-52	2019	KWS Irina	Mn	39.5
BBCH 50-52	2019	KWS Irina	Mn	22.8
BBCH 50-52	2019	KWS Irina	Mn	41.2
BBCH 50-52	2019	KWS Irina	Mn	35.6
BBCH 50-52	2019	KWS Irina	Mn	40.1
BBCH 50-52	2019	KWS Irina	Mn	37.6
BBCH 50-52	2019	KWS Irina	Mn	28.8
BBCH 50-52	2019	KWS Irina	Mn	26.5
BBCH 50-52	2019	KWS Irina	Mn	37.9
BBCH 50-52	2019	KWS Irina	Mn	25.7
BBCH 50-52	2019	KWS Irina	Mn	47.2
BBCH 50-52	2019	KWS Irina	Mn	41.5
BBCH 50-52	2019	KWS Irina	Mn	27.8
BBCH 50-52	2019	KWS Irina	Mn	40.5
BBCH 50-52	2019	KWS Irina	Mn	42.9
BBCH 50-52	2019	KWS Irina	Mn	41.3
BBCH 50-52	2019	KWS Irina	Mo	43.4
BBCH 50-52	2019	KWS Irina	Mo	58.7
BBCH 50-52	2019	KWS Irina	Mo	54.9
BBCH 50-52	2019	KWS Irina	Mo	45.4
BBCH 50-52	2019	KWS Irina	Mo	43.3
BBCH 50-52	2019	KWS Irina	Mo	22
BBCH 50-52	2019	KWS Irina	Mo	34.1
BBCH 50-52	2019	KWS Irina	Mo	33.2
BBCH 50-52	2019	KWS Irina	Mo	35.2
BBCH 50-52	2019	KWS Irina	Mo	31.2
BBCH 50-52	2019	KWS Irina	Mo	23.6
BBCH 50-52	2019	KWS Irina	Mo	28
BBCH 50-52	2019	KWS Irina	Mo	30.7
BBCH 50-52	2019	KWS Irina	Mo	53.3
BBCH 50-52	2019	KWS Irina	Mo	42.7
BBCH 50-52	2019	KWS Irina	Mo	42.4
BBCH 50-52	2019	KWS Irina	Mo	44.7
BBCH 50-52	2019	KWS Irina	Mo	42.1
BBCH 50-52	2019	KWS Irina	Mo	26.6
BBCH 50-52	2019	KWS Irina	Mo	31.3
BBCH 50-52	2019	KWS Irina	Zn	30
BBCH 50-52	2019	KWS Irina	Zn	33.4
BBCH 50-52	2019	KWS Irina	Zn	39.9
BBCH 50-52	2019	KWS Irina	Zn	30.6
BBCH 50-52	2019	KWS Irina	Zn	36.8
BBCH 50-52	2019	KWS Irina	Zn	30.2
BBCH 50-52	2019	KWS Irina	Zn	24.1
BBCH 50-52	2019	KWS Irina	Zn	20.7
BBCH 50-52	2019	KWS Irina	Zn	32.6
BBCH 50-52	2019	KWS Irina	Zn	34.2
BBCH 50-52	2019	KWS Irina	Zn	63.1
BBCH 50-52	2019	KWS Irina	Zn	35.8
BBCH 50-52	2019	KWS Irina	Zn	63.8
BBCH 50-52	2019	KWS Irina	Zn	51.9
BBCH 50-52	2019	KWS Irina	Zn	43.2
BBCH 50-52	2019	KWS Irina	Zn	46.6
BBCH 50-52	2019	KWS Irina	Zn	50.9
BBCH 50-52	2019	KWS Irina	Zn	36.8
BBCH 50-52	2019	KWS Irina	Zn	33.1
BBCH 50-52	2019	KWS Irina	Zn	31.3
BBCH 50-52	2020	KWS Irina	control	40.4
BBCH 50-52	2020	KWS Irina	control	39.3
BBCH 50-52	2020	KWS Irina	control	40.6
BBCH 50-52	2020	KWS Irina	control	39
BBCH 50-52	2020	KWS Irina	control	40.1
BBCH 50-52	2020	KWS Irina	control	36.2
BBCH 50-52	2020	KWS Irina	control	37.2
BBCH 50-52	2020	KWS Irina	control	37.3
BBCH 50-52	2020	KWS Irina	control	36.6
BBCH 50-52	2020	KWS Irina	control	43.9
BBCH 50-52	2020	KWS Irina	control	33.8
BBCH 50-52	2020	KWS Irina	control	33.4
BBCH 50-52	2020	KWS Irina	control	36.1
BBCH 50-52	2020	KWS Irina	control	38.1
BBCH 50-52	2020	KWS Irina	control	37.5
BBCH 50-52	2020	KWS Irina	control	41.1
BBCH 50-52	2020	KWS Irina	control	36.1
BBCH 50-52	2020	KWS Irina	control	33.9
BBCH 50-52	2020	KWS Irina	control	34.7
BBCH 50-52	2020	KWS Irina	control	40.4
BBCH 50-52	2020	KWS Irina	Cu	42.6
BBCH 50-52	2020	KWS Irina	Cu	39.3
BBCH 50-52	2020	KWS Irina	Cu	39.2
BBCH 50-52	2020	KWS Irina	Cu	43.2
BBCH 50-52	2020	KWS Irina	Cu	41.6
BBCH 50-52	2020	KWS Irina	Cu	40.2
BBCH 50-52	2020	KWS Irina	Cu	42.4
BBCH 50-52	2020	KWS Irina	Cu	43.3
BBCH 50-52	2020	KWS Irina	Cu	42
BBCH 50-52	2020	KWS Irina	Cu	40.2
BBCH 50-52	2020	KWS Irina	Cu	41.3
BBCH 50-52	2020	KWS Irina	Cu	42.4
BBCH 50-52	2020	KWS Irina	Cu	42.5
BBCH 50-52	2020	KWS Irina	Cu	40.9
BBCH 50-52	2020	KWS Irina	Cu	41.5
BBCH 50-52	2020	KWS Irina	Cu	40.9
BBCH 50-52	2020	KWS Irina	Cu	41.2
BBCH 50-52	2020	KWS Irina	Cu	41.5
BBCH 50-52	2020	KWS Irina	Cu	42.9
BBCH 50-52	2020	KWS Irina	Cu	42.5
BBCH 50-52	2020	KWS Irina	Mn	33.1
BBCH 50-52	2020	KWS Irina	Mn	34.2
BBCH 50-52	2020	KWS Irina	Mn	38.1
BBCH 50-52	2020	KWS Irina	Mn	31
BBCH 50-52	2020	KWS Irina	Mn	39.7
BBCH 50-52	2020	KWS Irina	Mn	32.9
BBCH 50-52	2020	KWS Irina	Mn	31.3
BBCH 50-52	2020	KWS Irina	Mn	32.9
BBCH 50-52	2020	KWS Irina	Mn	34.5
BBCH 50-52	2020	KWS Irina	Mn	34.4
BBCH 50-52	2020	KWS Irina	Mn	31.1
BBCH 50-52	2020	KWS Irina	Mn	32.5
BBCH 50-52	2020	KWS Irina	Mn	33.6
BBCH 50-52	2020	KWS Irina	Mn	35.8
BBCH 50-52	2020	KWS Irina	Mn	35.2
BBCH 50-52	2020	KWS Irina	Mn	43.5
BBCH 50-52	2020	KWS Irina	Mn	36
BBCH 50-52	2020	KWS Irina	Mn	34.9
BBCH 50-52	2020	KWS Irina	Mn	30.9
BBCH 50-52	2020	KWS Irina	Mn	34.9
BBCH 50-52	2020	KWS Irina	Mo	34.5
BBCH 50-52	2020	KWS Irina	Mo	35.3
BBCH 50-52	2020	KWS Irina	Mo	30.8
BBCH 50-52	2020	KWS Irina	Mo	30.7
BBCH 50-52	2020	KWS Irina	Mo	31.4
BBCH 50-52	2020	KWS Irina	Mo	33.1
BBCH 50-52	2020	KWS Irina	Mo	34.9
BBCH 50-52	2020	KWS Irina	Mo	30.6
BBCH 50-52	2020	KWS Irina	Mo	34.9
BBCH 50-52	2020	KWS Irina	Mo	33.5
BBCH 50-52	2020	KWS Irina	Mo	32.1
BBCH 50-52	2020	KWS Irina	Mo	32.3
BBCH 50-52	2020	KWS Irina	Mo	33.7
BBCH 50-52	2020	KWS Irina	Mo	30.1
BBCH 50-52	2020	KWS Irina	Mo	30.8
BBCH 50-52	2020	KWS Irina	Mo	30.8
BBCH 50-52	2020	KWS Irina	Mo	31.6
BBCH 50-52	2020	KWS Irina	Mo	33.8
BBCH 50-52	2020	KWS Irina	Mo	36.2
BBCH 50-52	2020	KWS Irina	Mo	40
BBCH 50-52	2020	KWS Irina	Zn	34.3
BBCH 50-52	2020	KWS Irina	Zn	29.9
BBCH 50-52	2020	KWS Irina	Zn	31.5
BBCH 50-52	2020	KWS Irina	Zn	29.9
BBCH 50-52	2020	KWS Irina	Zn	35.1
BBCH 50-52	2020	KWS Irina	Zn	29.4
BBCH 50-52	2020	KWS Irina	Zn	30.5
BBCH 50-52	2020	KWS Irina	Zn	30.9
BBCH 50-52	2020	KWS Irina	Zn	35.5
BBCH 50-52	2020	KWS Irina	Zn	34
BBCH 50-52	2020	KWS Irina	Zn	32.1
BBCH 50-52	2020	KWS Irina	Zn	32.2
BBCH 50-52	2020	KWS Irina	Zn	32.7
BBCH 50-52	2020	KWS Irina	Zn	32.9
BBCH 50-52	2020	KWS Irina	Zn	33.7
BBCH 50-52	2020	KWS Irina	Zn	27.7
BBCH 50-52	2020	KWS Irina	Zn	33.6
BBCH 50-52	2020	KWS Irina	Zn	34.9
BBCH 50-52	2020	KWS Irina	Zn	26.9
BBCH 50-52	2020	KWS Irina	Zn	33.9
BBCH 50-52	2021	KWS Irina	control	45
BBCH 50-52	2021	KWS Irina	control	42
BBCH 50-52	2021	KWS Irina	control	47.4
BBCH 50-52	2021	KWS Irina	control	46
BBCH 50-52	2021	KWS Irina	control	40.5
BBCH 50-52	2021	KWS Irina	control	42
BBCH 50-52	2021	KWS Irina	control	45
BBCH 50-52	2021	KWS Irina	control	41.1
BBCH 50-52	2021	KWS Irina	control	45
BBCH 50-52	2021	KWS Irina	control	43
BBCH 50-52	2021	KWS Irina	control	40.8
BBCH 50-52	2021	KWS Irina	control	42.6
BBCH 50-52	2021	KWS Irina	control	37.5
BBCH 50-52	2021	KWS Irina	control	48.8
BBCH 50-52	2021	KWS Irina	control	33
BBCH 50-52	2021	KWS Irina	control	28.6
BBCH 50-52	2021	KWS Irina	control	37.9
BBCH 50-52	2021	KWS Irina	control	38.6
BBCH 50-52	2021	KWS Irina	control	44.7
BBCH 50-52	2021	KWS Irina	control	39.7
BBCH 50-52	2021	KWS Irina	Cu	42.6
BBCH 50-52	2021	KWS Irina	Cu	47.6
BBCH 50-52	2021	KWS Irina	Cu	40.3
BBCH 50-52	2021	KWS Irina	Cu	41.7
BBCH 50-52	2021	KWS Irina	Cu	42.4
BBCH 50-52	2021	KWS Irina	Cu	51
BBCH 50-52	2021	KWS Irina	Cu	40.7
BBCH 50-52	2021	KWS Irina	Cu	43.6
BBCH 50-52	2021	KWS Irina	Cu	43.7
BBCH 50-52	2021	KWS Irina	Cu	44.4
BBCH 50-52	2021	KWS Irina	Cu	46
BBCH 50-52	2021	KWS Irina	Cu	41.5
BBCH 50-52	2021	KWS Irina	Cu	40
BBCH 50-52	2021	KWS Irina	Cu	44.9
BBCH 50-52	2021	KWS Irina	Cu	36.9
BBCH 50-52	2021	KWS Irina	Cu	45.2
BBCH 50-52	2021	KWS Irina	Cu	40.6
BBCH 50-52	2021	KWS Irina	Cu	39.1
BBCH 50-52	2021	KWS Irina	Cu	41.4
BBCH 50-52	2021	KWS Irina	Cu	40
BBCH 50-52	2021	KWS Irina	Mn	42.6
BBCH 50-52	2021	KWS Irina	Mn	42.4
BBCH 50-52	2021	KWS Irina	Mn	44.1
BBCH 50-52	2021	KWS Irina	Mn	38.5
BBCH 50-52	2021	KWS Irina	Mn	41.2
BBCH 50-52	2021	KWS Irina	Mn	45.1
BBCH 50-52	2021	KWS Irina	Mn	36.9
BBCH 50-52	2021	KWS Irina	Mn	38.2
BBCH 50-52	2021	KWS Irina	Mn	39.3
BBCH 50-52	2021	KWS Irina	Mn	41.2
BBCH 50-52	2021	KWS Irina	Mn	40.4
BBCH 50-52	2021	KWS Irina	Mn	40.4
BBCH 50-52	2021	KWS Irina	Mn	45.4
BBCH 50-52	2021	KWS Irina	Mn	44.8
BBCH 50-52	2021	KWS Irina	Mn	40.1
BBCH 50-52	2021	KWS Irina	Mn	46.9
BBCH 50-52	2021	KWS Irina	Mn	44.9
BBCH 50-52	2021	KWS Irina	Mn	41.3
BBCH 50-52	2021	KWS Irina	Mn	43.6
BBCH 50-52	2021	KWS Irina	Mn	54.5
BBCH 50-52	2021	KWS Irina	Mo	43.4
BBCH 50-52	2021	KWS Irina	Mo	36.1
BBCH 50-52	2021	KWS Irina	Mo	44.6
BBCH 50-52	2021	KWS Irina	Mo	46.4
BBCH 50-52	2021	KWS Irina	Mo	42.8
BBCH 50-52	2021	KWS Irina	Mo	38.8
BBCH 50-52	2021	KWS Irina	Mo	41.8
BBCH 50-52	2021	KWS Irina	Mo	43.6
BBCH 50-52	2021	KWS Irina	Mo	42.2
BBCH 50-52	2021	KWS Irina	Mo	51.1
BBCH 50-52	2021	KWS Irina	Mo	44.6
BBCH 50-52	2021	KWS Irina	Mo	39.4
BBCH 50-52	2021	KWS Irina	Mo	44.3
BBCH 50-52	2021	KWS Irina	Mo	44.1
BBCH 50-52	2021	KWS Irina	Mo	44.1
BBCH 50-52	2021	KWS Irina	Mo	43.7
BBCH 50-52	2021	KWS Irina	Mo	41.2
BBCH 50-52	2021	KWS Irina	Mo	43.3
BBCH 50-52	2021	KWS Irina	Mo	47.2
BBCH 50-52	2021	KWS Irina	Mo	48.9
BBCH 50-52	2021	KWS Irina	Zn	42.5
BBCH 50-52	2021	KWS Irina	Zn	47.9
BBCH 50-52	2021	KWS Irina	Zn	43.5
BBCH 50-52	2021	KWS Irina	Zn	43
BBCH 50-52	2021	KWS Irina	Zn	44.8
BBCH 50-52	2021	KWS Irina	Zn	54.9
BBCH 50-52	2021	KWS Irina	Zn	45.6
BBCH 50-52	2021	KWS Irina	Zn	64
BBCH 50-52	2021	KWS Irina	Zn	45.8
BBCH 50-52	2021	KWS Irina	Zn	46.8
BBCH 50-52	2021	KWS Irina	Zn	48.9
BBCH 50-52	2021	KWS Irina	Zn	40.6
BBCH 50-52	2021	KWS Irina	Zn	48.8
BBCH 50-52	2021	KWS Irina	Zn	45.8
BBCH 50-52	2021	KWS Irina	Zn	47.2
BBCH 50-52	2021	KWS Irina	Zn	39.5
BBCH 50-52	2021	KWS Irina	Zn	53.4
BBCH 50-52	2021	KWS Irina	Zn	45.1
BBCH 50-52	2021	KWS Irina	Zn	42.8
BBCH 50-52	2021	KWS Irina	Zn	41.4
BBCH 50-52	2019	RGT Planet	control	37.1
BBCH 50-52	2019	RGT Planet	control	35.5
BBCH 50-52	2019	RGT Planet	control	39.8
BBCH 50-52	2019	RGT Planet	control	38.9
BBCH 50-52	2019	RGT Planet	control	35.1
BBCH 50-52	2019	RGT Planet	control	36
BBCH 50-52	2019	RGT Planet	control	34.8
BBCH 50-52	2019	RGT Planet	control	38.4
BBCH 50-52	2019	RGT Planet	control	40.2
BBCH 50-52	2019	RGT Planet	control	41.4
BBCH 50-52	2019	RGT Planet	control	43.1
BBCH 50-52	2019	RGT Planet	control	38.1
BBCH 50-52	2019	RGT Planet	control	37.2
BBCH 50-52	2019	RGT Planet	control	40.5
BBCH 50-52	2019	RGT Planet	control	40.2
BBCH 50-52	2019	RGT Planet	control	35.4
BBCH 50-52	2019	RGT Planet	control	35.9
BBCH 50-52	2019	RGT Planet	control	36.3
BBCH 50-52	2019	RGT Planet	control	37.2
BBCH 50-52	2019	RGT Planet	control	40.9
BBCH 50-52	2019	RGT Planet	Cu	33.2
BBCH 50-52	2019	RGT Planet	Cu	53
BBCH 50-52	2019	RGT Planet	Cu	37.4
BBCH 50-52	2019	RGT Planet	Cu	40.6
BBCH 50-52	2019	RGT Planet	Cu	48.7
BBCH 50-52	2019	RGT Planet	Cu	45.8
BBCH 50-52	2019	RGT Planet	Cu	38.5
BBCH 50-52	2019	RGT Planet	Cu	44.3
BBCH 50-52	2019	RGT Planet	Cu	41.8
BBCH 50-52	2019	RGT Planet	Cu	43.6
BBCH 50-52	2019	RGT Planet	Cu	39.9
BBCH 50-52	2019	RGT Planet	Cu	41
BBCH 50-52	2019	RGT Planet	Cu	40
BBCH 50-52	2019	RGT Planet	Cu	35.3
BBCH 50-52	2019	RGT Planet	Cu	39.3
BBCH 50-52	2019	RGT Planet	Cu	38.1
BBCH 50-52	2019	RGT Planet	Cu	36.8
BBCH 50-52	2019	RGT Planet	Cu	47.5
BBCH 50-52	2019	RGT Planet	Cu	38.3
BBCH 50-52	2019	RGT Planet	Cu	43
BBCH 50-52	2019	RGT Planet	Mn	51.7
BBCH 50-52	2019	RGT Planet	Mn	43.2
BBCH 50-52	2019	RGT Planet	Mn	16.7
BBCH 50-52	2019	RGT Planet	Mn	38.5
BBCH 50-52	2019	RGT Planet	Mn	19.5
BBCH 50-52	2019	RGT Planet	Mn	48
BBCH 50-52	2019	RGT Planet	Mn	48.8
BBCH 50-52	2019	RGT Planet	Mn	38
BBCH 50-52	2019	RGT Planet	Mn	42.4
BBCH 50-52	2019	RGT Planet	Mn	35.8
BBCH 50-52	2019	RGT Planet	Mn	42.6
BBCH 50-52	2019	RGT Planet	Mn	44.1
BBCH 50-52	2019	RGT Planet	Mn	43.4
BBCH 50-52	2019	RGT Planet	Mn	44
BBCH 50-52	2019	RGT Planet	Mn	46
BBCH 50-52	2019	RGT Planet	Mn	51.7
BBCH 50-52	2019	RGT Planet	Mn	60.4
BBCH 50-52	2019	RGT Planet	Mn	61.9
BBCH 50-52	2019	RGT Planet	Mn	48.4
BBCH 50-52	2019	RGT Planet	Mn	44.2
BBCH 50-52	2019	RGT Planet	Mo	33.9
BBCH 50-52	2019	RGT Planet	Mo	30.2
BBCH 50-52	2019	RGT Planet	Mo	33.4
BBCH 50-52	2019	RGT Planet	Mo	47.5
BBCH 50-52	2019	RGT Planet	Mo	30.1
BBCH 50-52	2019	RGT Planet	Mo	44.4
BBCH 50-52	2019	RGT Planet	Mo	50.1
BBCH 50-52	2019	RGT Planet	Mo	44.2
BBCH 50-52	2019	RGT Planet	Mo	42.9
BBCH 50-52	2019	RGT Planet	Mo	33.6
BBCH 50-52	2019	RGT Planet	Mo	51.5
BBCH 50-52	2019	RGT Planet	Mo	45.4
BBCH 50-52	2019	RGT Planet	Mo	36.7
BBCH 50-52	2019	RGT Planet	Mo	41.1
BBCH 50-52	2019	RGT Planet	Mo	47.6
BBCH 50-52	2019	RGT Planet	Mo	36.5
BBCH 50-52	2019	RGT Planet	Mo	41
BBCH 50-52	2019	RGT Planet	Mo	37.6
BBCH 50-52	2019	RGT Planet	Mo	41
BBCH 50-52	2019	RGT Planet	Mo	36.9
BBCH 50-52	2019	RGT Planet	Zn	49.6
BBCH 50-52	2019	RGT Planet	Zn	45.9
BBCH 50-52	2019	RGT Planet	Zn	43.1
BBCH 50-52	2019	RGT Planet	Zn	49.1
BBCH 50-52	2019	RGT Planet	Zn	38.5
BBCH 50-52	2019	RGT Planet	Zn	65.6
BBCH 50-52	2019	RGT Planet	Zn	68.5
BBCH 50-52	2019	RGT Planet	Zn	50.2
BBCH 50-52	2019	RGT Planet	Zn	38.3
BBCH 50-52	2019	RGT Planet	Zn	49.7
BBCH 50-52	2019	RGT Planet	Zn	41.2
BBCH 50-52	2019	RGT Planet	Zn	39
BBCH 50-52	2019	RGT Planet	Zn	53.6
BBCH 50-52	2019	RGT Planet	Zn	54.1
BBCH 50-52	2019	RGT Planet	Zn	31
BBCH 50-52	2019	RGT Planet	Zn	47.6
BBCH 50-52	2019	RGT Planet	Zn	65.5
BBCH 50-52	2019	RGT Planet	Zn	68
BBCH 50-52	2019	RGT Planet	Zn	68.1
BBCH 50-52	2019	RGT Planet	Zn	39.6
BBCH 50-52	2020	RGT Planet	control	27.8
BBCH 50-52	2020	RGT Planet	control	26.4
BBCH 50-52	2020	RGT Planet	control	28.1
BBCH 50-52	2020	RGT Planet	control	30.6
BBCH 50-52	2020	RGT Planet	control	28.9
BBCH 50-52	2020	RGT Planet	control	30.2
BBCH 50-52	2020	RGT Planet	control	25.7
BBCH 50-52	2020	RGT Planet	control	30.1
BBCH 50-52	2020	RGT Planet	control	26.3
BBCH 50-52	2020	RGT Planet	control	28.3
BBCH 50-52	2020	RGT Planet	control	27.6
BBCH 50-52	2020	RGT Planet	control	29.9
BBCH 50-52	2020	RGT Planet	control	28.1
BBCH 50-52	2020	RGT Planet	control	26.1
BBCH 50-52	2020	RGT Planet	control	27.3
BBCH 50-52	2020	RGT Planet	control	26.4
BBCH 50-52	2020	RGT Planet	control	28.6
BBCH 50-52	2020	RGT Planet	control	30.5
BBCH 50-52	2020	RGT Planet	control	30.9
BBCH 50-52	2020	RGT Planet	control	29.9
BBCH 50-52	2020	RGT Planet	Cu	32.2
BBCH 50-52	2020	RGT Planet	Cu	36.1
BBCH 50-52	2020	RGT Planet	Cu	32.6
BBCH 50-52	2020	RGT Planet	Cu	22.7
BBCH 50-52	2020	RGT Planet	Cu	30.6
BBCH 50-52	2020	RGT Planet	Cu	31.2
BBCH 50-52	2020	RGT Planet	Cu	22.8
BBCH 50-52	2020	RGT Planet	Cu	30.3
BBCH 50-52	2020	RGT Planet	Cu	24.4
BBCH 50-52	2020	RGT Planet	Cu	33
BBCH 50-52	2020	RGT Planet	Cu	27.4
BBCH 50-52	2020	RGT Planet	Cu	37.1
BBCH 50-52	2020	RGT Planet	Cu	27.2
BBCH 50-52	2020	RGT Planet	Cu	45.5
BBCH 50-52	2020	RGT Planet	Cu	27.8
BBCH 50-52	2020	RGT Planet	Cu	25.9
BBCH 50-52	2020	RGT Planet	Cu	24.9
BBCH 50-52	2020	RGT Planet	Cu	30.8
BBCH 50-52	2020	RGT Planet	Cu	31.7
BBCH 50-52	2020	RGT Planet	Cu	25.4
BBCH 50-52	2020	RGT Planet	Mn	30.7
BBCH 50-52	2020	RGT Planet	Mn	32.9
BBCH 50-52	2020	RGT Planet	Mn	28.8
BBCH 50-52	2020	RGT Planet	Mn	30.3
BBCH 50-52	2020	RGT Planet	Mn	27.3
BBCH 50-52	2020	RGT Planet	Mn	31.9
BBCH 50-52	2020	RGT Planet	Mn	29.2
BBCH 50-52	2020	RGT Planet	Mn	27.7
BBCH 50-52	2020	RGT Planet	Mn	30.4
BBCH 50-52	2020	RGT Planet	Mn	28.9
BBCH 50-52	2020	RGT Planet	Mn	31
BBCH 50-52	2020	RGT Planet	Mn	30
BBCH 50-52	2020	RGT Planet	Mn	33.7
BBCH 50-52	2020	RGT Planet	Mn	33.1
BBCH 50-52	2020	RGT Planet	Mn	25.4
BBCH 50-52	2020	RGT Planet	Mn	21.6
BBCH 50-52	2020	RGT Planet	Mn	23.1
BBCH 50-52	2020	RGT Planet	Mn	26.8
BBCH 50-52	2020	RGT Planet	Mn	35.1
BBCH 50-52	2020	RGT Planet	Mn	32.1
BBCH 50-52	2020	RGT Planet	Mo	32.2
BBCH 50-52	2020	RGT Planet	Mo	37.5
BBCH 50-52	2020	RGT Planet	Mo	33.9
BBCH 50-52	2020	RGT Planet	Mo	43.8
BBCH 50-52	2020	RGT Planet	Mo	31.4
BBCH 50-52	2020	RGT Planet	Mo	35.8
BBCH 50-52	2020	RGT Planet	Mo	35.3
BBCH 50-52	2020	RGT Planet	Mo	36.6
BBCH 50-52	2020	RGT Planet	Mo	46.1
BBCH 50-52	2020	RGT Planet	Mo	35.3
BBCH 50-52	2020	RGT Planet	Mo	38.8
BBCH 50-52	2020	RGT Planet	Mo	40.1
BBCH 50-52	2020	RGT Planet	Mo	35.4
BBCH 50-52	2020	RGT Planet	Mo	35.9
BBCH 50-52	2020	RGT Planet	Mo	37.6
BBCH 50-52	2020	RGT Planet	Mo	40.1
BBCH 50-52	2020	RGT Planet	Mo	35.3
BBCH 50-52	2020	RGT Planet	Mo	35
BBCH 50-52	2020	RGT Planet	Mo	36.2
BBCH 50-52	2020	RGT Planet	Mo	35.3
BBCH 50-52	2020	RGT Planet	Zn	24.8
BBCH 50-52	2020	RGT Planet	Zn	25.3
BBCH 50-52	2020	RGT Planet	Zn	25.5
BBCH 50-52	2020	RGT Planet	Zn	25.1
BBCH 50-52	2020	RGT Planet	Zn	30
BBCH 50-52	2020	RGT Planet	Zn	24.6
BBCH 50-52	2020	RGT Planet	Zn	35
BBCH 50-52	2020	RGT Planet	Zn	30.5
BBCH 50-52	2020	RGT Planet	Zn	29.5
BBCH 50-52	2020	RGT Planet	Zn	29.6
BBCH 50-52	2020	RGT Planet	Zn	28.8
BBCH 50-52	2020	RGT Planet	Zn	26.8
BBCH 50-52	2020	RGT Planet	Zn	31
BBCH 50-52	2020	RGT Planet	Zn	25.6
BBCH 50-52	2020	RGT Planet	Zn	33.8
BBCH 50-52	2020	RGT Planet	Zn	30.5
BBCH 50-52	2020	RGT Planet	Zn	26.3
BBCH 50-52	2020	RGT Planet	Zn	36.1
BBCH 50-52	2020	RGT Planet	Zn	21.4
BBCH 50-52	2020	RGT Planet	Zn	28.3
BBCH 50-52	2021	RGT Planet	control	45
BBCH 50-52	2021	RGT Planet	control	42.3
BBCH 50-52	2021	RGT Planet	control	47
BBCH 50-52	2021	RGT Planet	control	46.2
BBCH 50-52	2021	RGT Planet	control	40.1
BBCH 50-52	2021	RGT Planet	control	42.1
BBCH 50-52	2021	RGT Planet	control	45
BBCH 50-52	2021	RGT Planet	control	41.9
BBCH 50-52	2021	RGT Planet	control	45
BBCH 50-52	2021	RGT Planet	control	43
BBCH 50-52	2021	RGT Planet	control	50.8
BBCH 50-52	2021	RGT Planet	control	37.5
BBCH 50-52	2021	RGT Planet	control	44.1
BBCH 50-52	2021	RGT Planet	control	52.4
BBCH 50-52	2021	RGT Planet	control	53.2
BBCH 50-52	2021	RGT Planet	control	41.8
BBCH 50-52	2021	RGT Planet	control	42.4
BBCH 50-52	2021	RGT Planet	control	41.5
BBCH 50-52	2021	RGT Planet	control	44.8
BBCH 50-52	2021	RGT Planet	control	48.3
BBCH 50-52	2021	RGT Planet	Cu	46.1
BBCH 50-52	2021	RGT Planet	Cu	44.6
BBCH 50-52	2021	RGT Planet	Cu	51.6
BBCH 50-52	2021	RGT Planet	Cu	50.2
BBCH 50-52	2021	RGT Planet	Cu	47.5
BBCH 50-52	2021	RGT Planet	Cu	49.6
BBCH 50-52	2021	RGT Planet	Cu	43.6
BBCH 50-52	2021	RGT Planet	Cu	45.1
BBCH 50-52	2021	RGT Planet	Cu	43.1
BBCH 50-52	2021	RGT Planet	Cu	45.8
BBCH 50-52	2021	RGT Planet	Cu	55.6
BBCH 50-52	2021	RGT Planet	Cu	47.6
BBCH 50-52	2021	RGT Planet	Cu	42.9
BBCH 50-52	2021	RGT Planet	Cu	45.2
BBCH 50-52	2021	RGT Planet	Cu	47.2
BBCH 50-52	2021	RGT Planet	Cu	43.4
BBCH 50-52	2021	RGT Planet	Cu	50.6
BBCH 50-52	2021	RGT Planet	Cu	49.9
BBCH 50-52	2021	RGT Planet	Cu	46
BBCH 50-52	2021	RGT Planet	Cu	45.9
BBCH 50-52	2021	RGT Planet	Mn	44.3
BBCH 50-52	2021	RGT Planet	Mn	54.9
BBCH 50-52	2021	RGT Planet	Mn	46.6
BBCH 50-52	2021	RGT Planet	Mn	45
BBCH 50-52	2021	RGT Planet	Mn	49
BBCH 50-52	2021	RGT Planet	Mn	46.4
BBCH 50-52	2021	RGT Planet	Mn	48.3
BBCH 50-52	2021	RGT Planet	Mn	45.9
BBCH 50-52	2021	RGT Planet	Mn	50.5
BBCH 50-52	2021	RGT Planet	Mn	44.8
BBCH 50-52	2021	RGT Planet	Mn	49.2
BBCH 50-52	2021	RGT Planet	Mn	51.3
BBCH 50-52	2021	RGT Planet	Mn	45.2
BBCH 50-52	2021	RGT Planet	Mn	48
BBCH 50-52	2021	RGT Planet	Mn	40.9
BBCH 50-52	2021	RGT Planet	Mn	47.2
BBCH 50-52	2021	RGT Planet	Mn	47.8
BBCH 50-52	2021	RGT Planet	Mn	42.7
BBCH 50-52	2021	RGT Planet	Mn	44.8
BBCH 50-52	2021	RGT Planet	Mn	44.9
BBCH 50-52	2021	RGT Planet	Mo	51.3
BBCH 50-52	2021	RGT Planet	Mo	43.1
BBCH 50-52	2021	RGT Planet	Mo	44.9
BBCH 50-52	2021	RGT Planet	Mo	44.4
BBCH 50-52	2021	RGT Planet	Mo	45.1
BBCH 50-52	2021	RGT Planet	Mo	46.8
BBCH 50-52	2021	RGT Planet	Mo	50
BBCH 50-52	2021	RGT Planet	Mo	54.4
BBCH 50-52	2021	RGT Planet	Mo	44.8
BBCH 50-52	2021	RGT Planet	Mo	48.7
BBCH 50-52	2021	RGT Planet	Mo	45.7
BBCH 50-52	2021	RGT Planet	Mo	49.5
BBCH 50-52	2021	RGT Planet	Mo	46
BBCH 50-52	2021	RGT Planet	Mo	45.1
BBCH 50-52	2021	RGT Planet	Mo	48.2
BBCH 50-52	2021	RGT Planet	Mo	47.6
BBCH 50-52	2021	RGT Planet	Mo	52.1
BBCH 50-52	2021	RGT Planet	Mo	54.7
BBCH 50-52	2021	RGT Planet	Mo	44.6
BBCH 50-52	2021	RGT Planet	Mo	46.8
BBCH 50-52	2021	RGT Planet	Zn	45.6
BBCH 50-52	2021	RGT Planet	Zn	45.4
BBCH 50-52	2021	RGT Planet	Zn	50.5
BBCH 50-52	2021	RGT Planet	Zn	49.2
BBCH 50-52	2021	RGT Planet	Zn	43.9
BBCH 50-52	2021	RGT Planet	Zn	49.6
BBCH 50-52	2021	RGT Planet	Zn	48.9
BBCH 50-52	2021	RGT Planet	Zn	45.9
BBCH 50-52	2021	RGT Planet	Zn	47.8
BBCH 50-52	2021	RGT Planet	Zn	49.7
BBCH 50-52	2021	RGT Planet	Zn	45.6
BBCH 50-52	2021	RGT Planet	Zn	48.9
BBCH 50-52	2021	RGT Planet	Zn	44
BBCH 50-52	2021	RGT Planet	Zn	44.2
BBCH 50-52	2021	RGT Planet	Zn	44.4
BBCH 50-52	2021	RGT Planet	Zn	44
BBCH 50-52	2021	RGT Planet	Zn	48.6
BBCH 50-52	2021	RGT Planet	Zn	47.6
BBCH 50-52	2021	RGT Planet	Zn	48.1
BBCH 50-52	2021	RGT Planet	Zn	47.5

## Sheet: LAI MTA
Date	Year	Cultivar	Fertilization	LAI	MTA
BBCH 43-45	2019	Baryłka	control	4.62	44
BBCH 43-45	2019	Baryłka	control	3.74	42
BBCH 43-45	2019	Baryłka	control	4.21	40
BBCH 43-45	2019	Baryłka	control	4.62	45
BBCH 43-45	2019	Baryłka	Cu	4.85	48
BBCH 43-45	2019	Baryłka	Cu	4.4	44
BBCH 43-45	2019	Baryłka	Cu	5.12	47
BBCH 43-45	2019	Baryłka	Cu	4.81	42
BBCH 43-45	2019	Baryłka	Mn	4.74	44
BBCH 43-45	2019	Baryłka	Mn	4.6	42
BBCH 43-45	2019	Baryłka	Mn	4.3	48
BBCH 43-45	2019	Baryłka	Mn	5.12	46
BBCH 43-45	2019	Baryłka	Mo	5.3	48
BBCH 43-45	2019	Baryłka	Mo	4.99	44
BBCH 43-45	2019	Baryłka	Mo	4.45	50
BBCH 43-45	2019	Baryłka	Mo	5.1	48
BBCH 43-45	2019	Baryłka	Zn	5.3	42
BBCH 43-45	2019	Baryłka	Zn	5.2	48
BBCH 43-45	2019	Baryłka	Zn	4.92	45
BBCH 43-45	2019	Baryłka	Zn	4.6	44
BBCH 43-45	2019	KWS Irina	control	5.2	44
BBCH 43-45	2019	KWS Irina	control	3.68	42
BBCH 43-45	2019	KWS Irina	control	4.7	46
BBCH 43-45	2019	KWS Irina	control	4.52	40
BBCH 43-45	2019	KWS Irina	Cu	5.32	47
BBCH 43-45	2019	KWS Irina	Cu	3.77	51
BBCH 43-45	2019	KWS Irina	Cu	4.74	50
BBCH 43-45	2019	KWS Irina	Cu	4.3	42
BBCH 43-45	2019	KWS Irina	Mn	4.75	47
BBCH 43-45	2019	KWS Irina	Mn	5.21	49
BBCH 43-45	2019	KWS Irina	Mn	3.69	52
BBCH 43-45	2019	KWS Irina	Mn	4.36	54
BBCH 43-45	2019	KWS Irina	Mo	4.5	62
BBCH 43-45	2019	KWS Irina	Mo	5.23	58
BBCH 43-45	2019	KWS Irina	Mo	4.92	57
BBCH 43-45	2019	KWS Irina	Mo	5.3	55
BBCH 43-45	2019	KWS Irina	Zn	4.85	59
BBCH 43-45	2019	KWS Irina	Zn	4.62	60
BBCH 43-45	2019	KWS Irina	Zn	4.9	54
BBCH 43-45	2019	KWS Irina	Zn	5.11	55
BBCH 43-45	2019	RGT Planet	control	4.2	54
BBCH 43-45	2019	RGT Planet	control	4.9	59
BBCH 43-45	2019	RGT Planet	control	5.1	56
BBCH 43-45	2019	RGT Planet	control	4.2	52
BBCH 43-45	2019	RGT Planet	Cu	4.96	46
BBCH 43-45	2019	RGT Planet	Cu	5.3	44
BBCH 43-45	2019	RGT Planet	Cu	4.8	42
BBCH 43-45	2019	RGT Planet	Cu	5.1	45
BBCH 43-45	2019	RGT Planet	Mn	5.3	49
BBCH 43-45	2019	RGT Planet	Mn	4.7	48
BBCH 43-45	2019	RGT Planet	Mn	4.32	44
BBCH 43-45	2019	RGT Planet	Mn	4.52	46
BBCH 43-45	2019	RGT Planet	Mo	4.2	48
BBCH 43-45	2019	RGT Planet	Mo	4.11	44
BBCH 43-45	2019	RGT Planet	Mo	4.75	46
BBCH 43-45	2019	RGT Planet	Mo	4.21	48
BBCH 43-45	2019	RGT Planet	Zn	3.98	49
BBCH 43-45	2019	RGT Planet	Zn	4.78	47
BBCH 43-45	2019	RGT Planet	Zn	5.11	52
BBCH 43-45	2019	RGT Planet	Zn	4.2	50
BBCH 43-45	2020	Baryłka	control	4.62	46
BBCH 43-45	2020	Baryłka	control	4.8	41
BBCH 43-45	2020	Baryłka	control	4.41	40
BBCH 43-45	2020	Baryłka	control	3.9	38
BBCH 43-45	2020	Baryłka	Cu	5.3	48
BBCH 43-45	2020	Baryłka	Cu	5.4	44
BBCH 43-45	2020	Baryłka	Cu	4.11	47
BBCH 43-45	2020	Baryłka	Cu	4.74	45
BBCH 43-45	2020	Baryłka	Mn	4.62	38
BBCH 43-45	2020	Baryłka	Mn	4.4	40
BBCH 43-45	2020	Baryłka	Mn	4.21	38
BBCH 43-45	2020	Baryłka	Mn	5.1	41
BBCH 43-45	2020	Baryłka	Mo	5.8	50
BBCH 43-45	2020	Baryłka	Mo	5.41	45
BBCH 43-45	2020	Baryłka	Mo	4.98	47
BBCH 43-45	2020	Baryłka	Mo	4.74	46
BBCH 43-45	2020	Baryłka	Zn	4.87	43
BBCH 43-45	2020	Baryłka	Zn	4.6	40
BBCH 43-45	2020	Baryłka	Zn	4.52	44
BBCH 43-45	2020	Baryłka	Zn	4.4	38
BBCH 43-45	2020	KWS Irina	control	4.44	44
BBCH 43-45	2020	KWS Irina	control	4.3	38
BBCH 43-45	2020	KWS Irina	control	4.51	36
BBCH 43-45	2020	KWS Irina	control	4.2	41
BBCH 43-45	2020	KWS Irina	Cu	3.87	48
BBCH 43-45	2020	KWS Irina	Cu	4.12	43
BBCH 43-45	2020	KWS Irina	Cu	3.7	42
BBCH 43-45	2020	KWS Irina	Cu	4.41	44
BBCH 43-45	2020	KWS Irina	Mn	4.2	48
BBCH 43-45	2020	KWS Irina	Mn	4.6	52
BBCH 43-45	2020	KWS Irina	Mn	4.44	47
BBCH 43-45	2020	KWS Irina	Mn	4.12	46
BBCH 43-45	2020	KWS Irina	Mo	5.02	60
BBCH 43-45	2020	KWS Irina	Mo	4.87	58
BBCH 43-45	2020	KWS Irina	Mo	4.65	55
BBCH 43-45	2020	KWS Irina	Mo	4.5	48
BBCH 43-45	2020	KWS Irina	Zn	4.23	52
BBCH 43-45	2020	KWS Irina	Zn	4.11	50
BBCH 43-45	2020	KWS Irina	Zn	3.85	48
BBCH 43-45	2020	KWS Irina	Zn	4.52	52
BBCH 43-45	2020	RGT Planet	control	4.02	40
BBCH 43-45	2020	RGT Planet	control	3.82	45
BBCH 43-45	2020	RGT Planet	control	4.3	38
BBCH 43-45	2020	RGT Planet	control	4	37
BBCH 43-45	2020	RGT Planet	Cu	4.8	56
BBCH 43-45	2020	RGT Planet	Cu	4.45	57
BBCH 43-45	2020	RGT Planet	Cu	4.36	54
BBCH 43-45	2020	RGT Planet	Cu	4.3	52
BBCH 43-45	2020	RGT Planet	Mn	4.41	51
BBCH 43-45	2020	RGT Planet	Mn	4.6	48
BBCH 43-45	2020	RGT Planet	Mn	4.52	45
BBCH 43-45	2020	RGT Planet	Mn	4.4	47
BBCH 43-45	2020	RGT Planet	Mo	4.75	45
BBCH 43-45	2020	RGT Planet	Mo	4.8	41
BBCH 43-45	2020	RGT Planet	Mo	3.9	49
BBCH 43-45	2020	RGT Planet	Mo	4.3	42
BBCH 43-45	2020	RGT Planet	Zn	4.1	52
BBCH 43-45	2020	RGT Planet	Zn	3.9	47
BBCH 43-45	2020	RGT Planet	Zn	3.85	44
BBCH 43-45	2020	RGT Planet	Zn	4.11	45
BBCH 43-45	2021	Baryłka	control	5.1	40
BBCH 43-45	2021	Baryłka	control	4.74	38
BBCH 43-45	2021	Baryłka	control	4.6	42
BBCH 43-45	2021	Baryłka	control	4.21	41
BBCH 43-45	2021	Baryłka	Cu	5.74	42
BBCH 43-45	2021	Baryłka	Cu	5.6	40
BBCH 43-45	2021	Baryłka	Cu	5.2	39
BBCH 43-45	2021	Baryłka	Cu	4.91	46
BBCH 43-45	2021	Baryłka	Mn	4.9	47
BBCH 43-45	2021	Baryłka	Mn	5.26	40
BBCH 43-45	2021	Baryłka	Mn	4.74	44
BBCH 43-45	2021	Baryłka	Mn	4.82	42
BBCH 43-45	2021	Baryłka	Mo	5.02	40
BBCH 43-45	2021	Baryłka	Mo	5.3	37
BBCH 43-45	2021	Baryłka	Mo	4.84	39
BBCH 43-45	2021	Baryłka	Mo	4.77	37
BBCH 43-45	2021	Baryłka	Zn	5.8	42
BBCH 43-45	2021	Baryłka	Zn	5.12	40
BBCH 43-45	2021	Baryłka	Zn	5.33	37
BBCH 43-45	2021	Baryłka	Zn	5.06	40
BBCH 43-45	2021	KWS Irina	control	5.9	38
BBCH 43-45	2021	KWS Irina	control	5.54	40
BBCH 43-45	2021	KWS Irina	control	5.4	40
BBCH 43-45	2021	KWS Irina	control	4.95	38
BBCH 43-45	2021	KWS Irina	Cu	5.8	44
BBCH 43-45	2021	KWS Irina	Cu	6.3	40
BBCH 43-45	2021	KWS Irina	Cu	5.74	39
BBCH 43-45	2021	KWS Irina	Cu	6.48	37
BBCH 43-45	2021	KWS Irina	Mn	5.98	40
BBCH 43-45	2021	KWS Irina	Mn	6.2	38
BBCH 43-45	2021	KWS Irina	Mn	5.4	44
BBCH 43-45	2021	KWS Irina	Mn	5.77	42
BBCH 43-45	2021	KWS Irina	Mo	6.4	42
BBCH 43-45	2021	KWS Irina	Mo	6.2	45
BBCH 43-45	2021	KWS Irina	Mo	5.74	40
BBCH 43-45	2021	KWS Irina	Mo	6.64	38
BBCH 43-45	2021	KWS Irina	Zn	6.41	42
BBCH 43-45	2021	KWS Irina	Zn	6.7	41
BBCH 43-45	2021	KWS Irina	Zn	6.52	38
BBCH 43-45	2021	KWS Irina	Zn	6.12	40
BBCH 43-45	2021	RGT Planet	control	5.88	44
BBCH 43-45	2021	RGT Planet	control	5.91	40
BBCH 43-45	2021	RGT Planet	control	6.2	38
BBCH 43-45	2021	RGT Planet	control	6.52	41
BBCH 43-45	2021	RGT Planet	Cu	5.6	44
BBCH 43-45	2021	RGT Planet	Cu	5.2	42
BBCH 43-45	2021	RGT Planet	Cu	4.87	43
BBCH 43-45	2021	RGT Planet	Cu	4.9	43
BBCH 43-45	2021	RGT Planet	Mn	6.11	45
BBCH 43-45	2021	RGT Planet	Mn	5.74	44
BBCH 43-45	2021	RGT Planet	Mn	5.6	41
BBCH 43-45	2021	RGT Planet	Mn	5.36	45
BBCH 43-45	2021	RGT Planet	Mo	6.22	44
BBCH 43-45	2021	RGT Planet	Mo	6.5	44
BBCH 43-45	2021	RGT Planet	Mo	5.41	41
BBCH 43-45	2021	RGT Planet	Mo	5.32	40
BBCH 43-45	2021	RGT Planet	Zn	4.77	45
BBCH 43-45	2021	RGT Planet	Zn	4.82	44
BBCH 43-45	2021	RGT Planet	Zn	5.02	40
BBCH 43-45	2021	RGT Planet	Zn	5.2	39
BBCH 50-52	2019	Baryłka	control	5.12	44
BBCH 50-52	2019	Baryłka	control	5.02	42
BBCH 50-52	2019	Baryłka	control	4.98	43
BBCH 50-52	2019	Baryłka	control	4.89	45
BBCH 50-52	2019	Baryłka	Cu	5.23	50
BBCH 50-52	2019	Baryłka	Cu	5.44	49
BBCH 50-52	2019	Baryłka	Cu	5.16	51
BBCH 50-52	2019	Baryłka	Cu	5.45	52
BBCH 50-52	2019	Baryłka	Mn	4.98	44
BBCH 50-52	2019	Baryłka	Mn	5.12	45
BBCH 50-52	2019	Baryłka	Mn	5.22	47
BBCH 50-52	2019	Baryłka	Mn	5.31	49
BBCH 50-52	2019	Baryłka	Mo	5.7	50
BBCH 50-52	2019	Baryłka	Mo	5.45	48
BBCH 50-52	2019	Baryłka	Mo	5.65	52
BBCH 50-52	2019	Baryłka	Mo	5.45	54
BBCH 50-52	2019	Baryłka	Zn	5.1	45
BBCH 50-52	2019	Baryłka	Zn	5.24	47
BBCH 50-52	2019	Baryłka	Zn	5.21	44
BBCH 50-52	2019	Baryłka	Zn	5.12	44
BBCH 50-52	2019	KWS Irina	control	4.7	43
BBCH 50-52	2019	KWS Irina	control	4.65	44
BBCH 50-52	2019	KWS Irina	control	4.61	41
BBCH 50-52	2019	KWS Irina	control	4.64	43
BBCH 50-52	2019	KWS Irina	Cu	4.82	48
BBCH 50-52	2019	KWS Irina	Cu	4.83	49
BBCH 50-52	2019	KWS Irina	Cu	4.75	51
BBCH 50-52	2019	KWS Irina	Cu	4.9	50
BBCH 50-52	2019	KWS Irina	Mn	4.8	52
BBCH 50-52	2019	KWS Irina	Mn	4.77	53
BBCH 50-52	2019	KWS Irina	Mn	4.9	50
BBCH 50-52	2019	KWS Irina	Mn	5.12	51
BBCH 50-52	2019	KWS Irina	Mo	4.82	61
BBCH 50-52	2019	KWS Irina	Mo	4.75	60
BBCH 50-52	2019	KWS Irina	Mo	4.7	58
BBCH 50-52	2019	KWS Irina	Mo	4.8	59
BBCH 50-52	2019	KWS Irina	Zn	4.8	56
BBCH 50-52	2019	KWS Irina	Zn	5.2	58
BBCH 50-52	2019	KWS Irina	Zn	5.32	58
BBCH 50-52	2019	KWS Irina	Zn	5.44	60
BBCH 50-52	2019	RGT Planet	control	4.8	58
BBCH 50-52	2019	RGT Planet	control	4.85	59
BBCH 50-52	2019	RGT Planet	control	4.69	57
BBCH 50-52	2019	RGT Planet	control	4.78	60
BBCH 50-52	2019	RGT Planet	Cu	5.12	48
BBCH 50-52	2019	RGT Planet	Cu	5.23	47
BBCH 50-52	2019	RGT Planet	Cu	5.44	48
BBCH 50-52	2019	RGT Planet	Cu	5.55	46
BBCH 50-52	2019	RGT Planet	Mn	4.93	50
BBCH 50-52	2019	RGT Planet	Mn	4.85	52
BBCH 50-52	2019	RGT Planet	Mn	4.87	51
BBCH 50-52	2019	RGT Planet	Mn	5.06	52
BBCH 50-52	2019	RGT Planet	Mo	5.01	48
BBCH 50-52	2019	RGT Planet	Mo	4.68	49
BBCH 50-52	2019	RGT Planet	Mo	4.99	51
BBCH 50-52	2019	RGT Planet	Mo	5.14	51
BBCH 50-52	2019	RGT Planet	Zn	5.31	51
BBCH 50-52	2019	RGT Planet	Zn	5.26	52
BBCH 50-52	2019	RGT Planet	Zn	4.65	52
BBCH 50-52	2019	RGT Planet	Zn	5.12	54
BBCH 50-52	2020	Baryłka	control	4.8	48
BBCH 50-52	2020	Baryłka	control	4.85	47
BBCH 50-52	2020	Baryłka	control	4.8	41
BBCH 50-52	2020	Baryłka	control	4.98	40
BBCH 50-52	2020	Baryłka	Cu	5.4	54
BBCH 50-52	2020	Baryłka	Cu	4.69	43
BBCH 50-52	2020	Baryłka	Cu	5.98	55
BBCH 50-52	2020	Baryłka	Cu	4.84	50
BBCH 50-52	2020	Baryłka	Mn	4.6	45
BBCH 50-52	2020	Baryłka	Mn	4.99	41
BBCH 50-52	2020	Baryłka	Mn	4.84	47
BBCH 50-52	2020	Baryłka	Mn	4.79	40
BBCH 50-52	2020	Baryłka	Mo	4.72	42
BBCH 50-52	2020	Baryłka	Mo	5.65	54
BBCH 50-52	2020	Baryłka	Mo	5.63	58
BBCH 50-52	2020	Baryłka	Mo	6.09	44
BBCH 50-52	2020	Baryłka	Zn	4.86	41
BBCH 50-52	2020	Baryłka	Zn	5.43	42
BBCH 50-52	2020	Baryłka	Zn	4.99	51
BBCH 50-52	2020	Baryłka	Zn	5.02	41
BBCH 50-52	2020	KWS Irina	control	4.7	45
BBCH 50-52	2020	KWS Irina	control	4.65	43
BBCH 50-52	2020	KWS Irina	control	4.6	43
BBCH 50-52	2020	KWS Irina	control	4.52	40
BBCH 50-52	2020	KWS Irina	Cu	4.42	41
BBCH 50-52	2020	KWS Irina	Cu	4.86	53
BBCH 50-52	2020	KWS Irina	Cu	4.86	45
BBCH 50-52	2020	KWS Irina	Cu	4.06	51
BBCH 50-52	2020	KWS Irina	Mn	3.96	45
BBCH 50-52	2020	KWS Irina	Mn	4.36	49
BBCH 50-52	2020	KWS Irina	Mn	5.63	60
BBCH 50-52	2020	KWS Irina	Mn	5.13	57
BBCH 50-52	2020	KWS Irina	Mo	4.89	61
BBCH 50-52	2020	KWS Irina	Mo	5.9	52
BBCH 50-52	2020	KWS Irina	Mo	5.05	62
BBCH 50-52	2020	KWS Irina	Mo	5.09	64
BBCH 50-52	2020	KWS Irina	Zn	4.19	60
BBCH 50-52	2020	KWS Irina	Zn	5.59	52
BBCH 50-52	2020	KWS Irina	Zn	4.04	54
BBCH 50-52	2020	KWS Irina	Zn	4.76	57
BBCH 50-52	2020	RGT Planet	control	4.65	45
BBCH 50-52	2020	RGT Planet	control	4.23	40
BBCH 50-52	2020	RGT Planet	control	4.03	42
BBCH 50-52	2020	RGT Planet	control	4.58	41
BBCH 50-52	2020	RGT Planet	Cu	5.34	61
BBCH 50-52	2020	RGT Planet	Cu	5.43	54
BBCH 50-52	2020	RGT Planet	Cu	4.03	62
BBCH 50-52	2020	RGT Planet	Cu	4.35	52
BBCH 50-52	2020	RGT Planet	Mn	3.41	46
BBCH 50-52	2020	RGT Planet	Mn	5.17	60
BBCH 50-52	2020	RGT Planet	Mn	5.53	51
BBCH 50-52	2020	RGT Planet	Mn	4.76	44
BBCH 50-52	2020	RGT Planet	Mo	5.11	46
BBCH 50-52	2020	RGT Planet	Mo	5.41	53
BBCH 50-52	2020	RGT Planet	Mo	5.12	40
BBCH 50-52	2020	RGT Planet	Mo	4.52	49
BBCH 50-52	2020	RGT Planet	Zn	4.52	50
BBCH 50-52	2020	RGT Planet	Zn	5.36	58
BBCH 50-52	2020	RGT Planet	Zn	4.4	44
BBCH 50-52	2020	RGT Planet	Zn	4.09	46
BBCH 50-52	2021	Baryłka	control	4.77	43
BBCH 50-52	2021	Baryłka	control	4.57	42
BBCH 50-52	2021	Baryłka	control	4.98	44
BBCH 50-52	2021	Baryłka	control	5.31	43
BBCH 50-52	2021	Baryłka	Cu	6.74	45
BBCH 50-52	2021	Baryłka	Cu	5.61	43
BBCH 50-52	2021	Baryłka	Cu	4.99	39
BBCH 50-52	2021	Baryłka	Cu	5.65	50
BBCH 50-52	2021	Baryłka	Mn	4.85	42
BBCH 50-52	2021	Baryłka	Mn	5.63	50
BBCH 50-52	2021	Baryłka	Mn	4.73	42
BBCH 50-52	2021	Baryłka	Mn	5.32	50
BBCH 50-52	2021	Baryłka	Mo	5.67	41
BBCH 50-52	2021	Baryłka	Mo	4.19	43
BBCH 50-52	2021	Baryłka	Mo	5.25	42
BBCH 50-52	2021	Baryłka	Mo	5.56	41
BBCH 50-52	2021	Baryłka	Zn	5.76	42
BBCH 50-52	2021	Baryłka	Zn	5.29	41
BBCH 50-52	2021	Baryłka	Zn	5.91	41
BBCH 50-52	2021	Baryłka	Zn	5.65	41
BBCH 50-52	2021	KWS Irina	control	5.5	41
BBCH 50-52	2021	KWS Irina	control	5.91	41
BBCH 50-52	2021	KWS Irina	control	5.83	42
BBCH 50-52	2021	KWS Irina	control	6.11	41
BBCH 50-52	2021	KWS Irina	Cu	6.13	41
BBCH 50-52	2021	KWS Irina	Cu	6.63	42
BBCH 50-52	2021	KWS Irina	Cu	6.46	41
BBCH 50-52	2021	KWS Irina	Cu	8.15	47
BBCH 50-52	2021	KWS Irina	Mn	7.07	41
BBCH 50-52	2021	KWS Irina	Mn	6.56	41
BBCH 50-52	2021	KWS Irina	Mn	5.77	42
BBCH 50-52	2021	KWS Irina	Mn	5.02	46
BBCH 50-52	2021	KWS Irina	Mo	5.97	41
BBCH 50-52	2021	KWS Irina	Mo	7.23	48
BBCH 50-52	2021	KWS Irina	Mo	7.15	45
BBCH 50-52	2021	KWS Irina	Mo	6.16	42
BBCH 50-52	2021	KWS Irina	Zn	8.46	43
BBCH 50-52	2021	KWS Irina	Zn	7.13	41
BBCH 50-52	2021	KWS Irina	Zn	5.84	41
BBCH 50-52	2021	KWS Irina	Zn	6.47	41
BBCH 50-52	2021	RGT Planet	control	6.51	42
BBCH 50-52	2021	RGT Planet	control	6.45	44
BBCH 50-52	2021	RGT Planet	control	6.6	43
BBCH 50-52	2021	RGT Planet	control	6.55	43
BBCH 50-52	2021	RGT Planet	Cu	6.18	49
BBCH 50-52	2021	RGT Planet	Cu	5.86	42
BBCH 50-52	2021	RGT Planet	Cu	5.01	41
BBCH 50-52	2021	RGT Planet	Cu	4.7	43
BBCH 50-52	2021	RGT Planet	Mn	7.38	53
BBCH 50-52	2021	RGT Planet	Mn	6.46	41
BBCH 50-52	2021	RGT Planet	Mn	5.25	44
BBCH 50-52	2021	RGT Planet	Mn	5.71	41
BBCH 50-52	2021	RGT Planet	Mo	6.3	48
BBCH 50-52	2021	RGT Planet	Mo	6.43	41
BBCH 50-52	2021	RGT Planet	Mo	5.3	42
BBCH 50-52	2021	RGT Planet	Mo	6.28	42
BBCH 50-52	2021	RGT Planet	Zn	6.18	48
BBCH 50-52	2021	RGT Planet	Zn	4.87	44
BBCH 50-52	2021	RGT Planet	Zn	5.2	43
BBCH 50-52	2021	RGT Planet	Zn	5.12	43

## Sheet: gas exchange
Date	Year	Cultivar	Fertilization	ci	E	gs	Pn
BBCH 43-45	2019	Baryłka	control	275	3.94	0.51	13.1
BBCH 43-45	2019	Baryłka	control	283	3.48	0.44	12.65
BBCH 43-45	2019	Baryłka	control	284	4.21	0.45	12.05
BBCH 43-45	2019	Baryłka	control	290	4.15	0.43	13.3
BBCH 43-45	2019	Baryłka	control	303	4.8	0.41	14.01
BBCH 43-45	2019	Baryłka	control	294	3.25	0.4	13
BBCH 43-45	2019	Baryłka	control	255	3.7	0.46	13.26
BBCH 43-45	2019	Baryłka	control	279	4	0.38	14.02
BBCH 43-45	2019	Baryłka	control	290	4.74	0.46	12.59
BBCH 43-45	2019	Baryłka	control	297	3.25	0.42	12.05
BBCH 43-45	2019	Baryłka	control	292	3.14	0.45	11.44
BBCH 43-45	2019	Baryłka	control	296	4.58	0.49	11.25
BBCH 43-45	2019	Baryłka	Cu	295	3.45	0.49	14.02
BBCH 43-45	2019	Baryłka	Cu	302	4.12	0.51	13.25
BBCH 43-45	2019	Baryłka	Cu	299	4.36	0.44	15.62
BBCH 43-45	2019	Baryłka	Cu	305	5.41	0.58	16.41
BBCH 43-45	2019	Baryłka	Cu	303	3.54	0.46	15.5
BBCH 43-45	2019	Baryłka	Cu	279	4.96	0.42	16.41
BBCH 43-45	2019	Baryłka	Cu	284	5.11	0.44	14.39
BBCH 43-45	2019	Baryłka	Cu	302	5.26	0.47	15.05
BBCH 43-45	2019	Baryłka	Cu	310	4.05	0.51	13.54
BBCH 43-45	2019	Baryłka	Cu	324	3.61	0.5	14.95
BBCH 43-45	2019	Baryłka	Cu	285	4.41	0.48	15.82
BBCH 43-45	2019	Baryłka	Cu	270	4.5	0.46	14.99
BBCH 43-45	2019	Baryłka	Mn	290	3.45	0.47	14.1
BBCH 43-45	2019	Baryłka	Mn	292	4.51	0.42	14.23
BBCH 43-45	2019	Baryłka	Mn	302	5.28	0.44	13.65
BBCH 43-45	2019	Baryłka	Mn	302	4.79	0.48	13.5
BBCH 43-45	2019	Baryłka	Mn	300	5.45	0.5	14.02
BBCH 43-45	2019	Baryłka	Mn	295	3.79	0.49	13.81
BBCH 43-45	2019	Baryłka	Mn	294	3.52	0.42	12.92
BBCH 43-45	2019	Baryłka	Mn	285	3.77	0.47	13.47
BBCH 43-45	2019	Baryłka	Mn	279	3.65	0.49	14.23
BBCH 43-45	2019	Baryłka	Mn	282	3.14	0.5	13.65
BBCH 43-45	2019	Baryłka	Mn	320	3.12	0.48	13.88
BBCH 43-45	2019	Baryłka	Mn	294	3.64	0.46	14.39
BBCH 43-45	2019	Baryłka	Mo	290	3.66	0.55	15.6
BBCH 43-45	2019	Baryłka	Mo	286	3.79	0.61	13.2
BBCH 43-45	2019	Baryłka	Mo	288	4.33	0.52	14
BBCH 43-45	2019	Baryłka	Mo	252	4.51	0.5	15.06
BBCH 43-45	2019	Baryłka	Mo	291	5.18	0.49	13.52
BBCH 43-45	2019	Baryłka	Mo	285	3.95	0.63	14.95
BBCH 43-45	2019	Baryłka	Mo	303	3.8	0.51	15.08
BBCH 43-45	2019	Baryłka	Mo	325	3.27	0.52	15.51
BBCH 43-45	2019	Baryłka	Mo	299	4.31	0.61	15.3
BBCH 43-45	2019	Baryłka	Mo	319	4.51	0.6	14.74
BBCH 43-45	2019	Baryłka	Mo	324	3.66	0.58	14.6
BBCH 43-45	2019	Baryłka	Mo	301	3.12	0.54	14.25
BBCH 43-45	2019	Baryłka	Zn	294	4.12	0.48	14.28
BBCH 43-45	2019	Baryłka	Zn	290	4.44	0.52	13.6
BBCH 43-45	2019	Baryłka	Zn	296	5.62	0.61	15.4
BBCH 43-45	2019	Baryłka	Zn	301	5.15	0.52	15.55
BBCH 43-45	2019	Baryłka	Zn	284	4.83	0.6	15.82
BBCH 43-45	2019	Baryłka	Zn	288	4.5	0.54	15.4
BBCH 43-45	2019	Baryłka	Zn	296	5.09	0.5	14.99
BBCH 43-45	2019	Baryłka	Zn	308	5.11	0.55	14.6
BBCH 43-45	2019	Baryłka	Zn	311	4.44	0.63	15.2
BBCH 43-45	2019	Baryłka	Zn	296	4.13	0.48	14.47
BBCH 43-45	2019	Baryłka	Zn	290	4.09	0.5	14.71
BBCH 43-45	2019	Baryłka	Zn	300	5.01	0.45	15.12
BBCH 43-45	2019	KWS Irina	control	301	4.14	0.51	14.6
BBCH 43-45	2019	KWS Irina	control	280	4.21	0.52	14.97
BBCH 43-45	2019	KWS Irina	control	299	4.51	0.49	15.28
BBCH 43-45	2019	KWS Irina	control	275	4.33	0.48	14.3
BBCH 43-45	2019	KWS Irina	control	280	4.25	0.5	15.62
BBCH 43-45	2019	KWS Irina	control	266	3.74	0.49	14.74
BBCH 43-45	2019	KWS Irina	control	271	3.92	0.5	14.3
BBCH 43-45	2019	KWS Irina	control	277	4.02	0.51	14.41
BBCH 43-45	2019	KWS Irina	control	281	4.19	0.44	13.74
BBCH 43-45	2019	KWS Irina	control	275	3.87	0.48	14.68
BBCH 43-45	2019	KWS Irina	control	288	3.9	0.48	14.82
BBCH 43-45	2019	KWS Irina	control	291	3.65	0.52	14.7
BBCH 43-45	2019	KWS Irina	Cu	295	4.8	0.52	15.4
BBCH 43-45	2019	KWS Irina	Cu	302	4.94	0.51	16.41
BBCH 43-45	2019	KWS Irina	Cu	300	4.9	0.51	15.74
BBCH 43-45	2019	KWS Irina	Cu	298	4.78	0.54	16.02
BBCH 43-45	2019	KWS Irina	Cu	292	4.77	0.62	17.25
BBCH 43-45	2019	KWS Irina	Cu	288	5.02	0.49	16.55
BBCH 43-45	2019	KWS Irina	Cu	297	4.9	0.54	17.02
BBCH 43-45	2019	KWS Irina	Cu	301	4.88	0.59	16.21
BBCH 43-45	2019	KWS Irina	Cu	302	5.02	0.49	16.3
BBCH 43-45	2019	KWS Irina	Cu	298	4.9	0.56	16.49
BBCH 43-45	2019	KWS Irina	Cu	295	4.95	0.61	17.02
BBCH 43-45	2019	KWS Irina	Cu	304	5.03	0.6	16.38
BBCH 43-45	2019	KWS Irina	Mn	288	5.02	0.54	15.37
BBCH 43-45	2019	KWS Irina	Mn	285	5.11	0.57	14.95
BBCH 43-45	2019	KWS Irina	Mn	290	5.41	0.51	15.02
BBCH 43-45	2019	KWS Irina	Mn	283	4.88	0.63	14.44
BBCH 43-45	2019	KWS Irina	Mn	287	4.35	0.59	15.64
BBCH 43-45	2019	KWS Irina	Mn	267	4.62	0.58	16.05
BBCH 43-45	2019	KWS Irina	Mn	290	4.56	0.62	15.44
BBCH 43-45	2019	KWS Irina	Mn	289	5.01	0.65	16.356
BBCH 43-45	2019	KWS Irina	Mn	295	4.41	0.6	16.7
BBCH 43-45	2019	KWS Irina	Mn	304	4.69	0.64	16.81
BBCH 43-45	2019	KWS Irina	Mn	301	4.8	0.62	15.98
BBCH 43-45	2019	KWS Irina	Mn	297	4.41	0.61	15.7
BBCH 43-45	2019	KWS Irina	Mo	301	4.8	0.59	16.02
BBCH 43-45	2019	KWS Irina	Mo	303	5.32	0.58	16.3
BBCH 43-45	2019	KWS Irina	Mo	298	5.11	0.63	15.48
BBCH 43-45	2019	KWS Irina	Mo	302	4.77	0.61	14.5
BBCH 43-45	2019	KWS Irina	Mo	304	4.69	0.6	16.36
BBCH 43-45	2019	KWS Irina	Mo	311	4.93	0.58	16.6
BBCH 43-45	2019	KWS Irina	Mo	299	4.44	0.59	15.94
BBCH 43-45	2019	KWS Irina	Mo	304	4.85	0.62	15.9
BBCH 43-45	2019	KWS Irina	Mo	314	5.09	0.62	16.02
BBCH 43-45	2019	KWS Irina	Mo	320	5.14	0.64	16
BBCH 43-45	2019	KWS Irina	Mo	300	5.2	0.58	15.47
BBCH 43-45	2019	KWS Irina	Mo	292	4.99	0.59	15.92
BBCH 43-45	2019	KWS Irina	Zn	295	4.5	0.61	14.79
BBCH 43-45	2019	KWS Irina	Zn	290	4.69	0.54	15.45
BBCH 43-45	2019	KWS Irina	Zn	284	5.02	0.6	14.4
BBCH 43-45	2019	KWS Irina	Zn	302	4.82	0.57	16.24
BBCH 43-45	2019	KWS Irina	Zn	300	4.5	0.55	14.79
BBCH 43-45	2019	KWS Irina	Zn	294	4.91	0.52	14.9
BBCH 43-45	2019	KWS Irina	Zn	299	5.03	0.63	15.2
BBCH 43-45	2019	KWS Irina	Zn	301	4.8	0.57	14.41
BBCH 43-45	2019	KWS Irina	Zn	295	4.79	0.54	14.2
BBCH 43-45	2019	KWS Irina	Zn	302	4.61	0.59	14.93
BBCH 43-45	2019	KWS Irina	Zn	289	5.11	0.61	15.01
BBCH 43-45	2019	KWS Irina	Zn	297	4.46	0.6	15.22
BBCH 43-45	2019	RGT Planet	control	299	4.51	0.54	14.3
BBCH 43-45	2019	RGT Planet	control	302	4.44	0.54	15.1
BBCH 43-45	2019	RGT Planet	control	300	4.8	0.62	14.74
BBCH 43-45	2019	RGT Planet	control	284	5.06	0.5	14.6
BBCH 43-45	2019	RGT Planet	control	311	5.02	0.64	15.23
BBCH 43-45	2019	RGT Planet	control	305	5.11	0.59	14.8
BBCH 43-45	2019	RGT Planet	control	294	4.6	0.6	14.66
BBCH 43-45	2019	RGT Planet	control	297	4.55	0.58	15.02
BBCH 43-45	2019	RGT Planet	control	309	4.3	0.54	14.25
BBCH 43-45	2019	RGT Planet	control	303	3.9	0.55	15.16
BBCH 43-45	2019	RGT Planet	control	311	4.25	0.5	14.6
BBCH 43-45	2019	RGT Planet	control	288	5.02	0.56	14.4
BBCH 43-45	2019	RGT Planet	Cu	323	5.5	0.53	15.6
BBCH 43-45	2019	RGT Planet	Cu	316	4.7	0.55	16.02
BBCH 43-45	2019	RGT Planet	Cu	308	4.61	0.51	16.14
BBCH 43-45	2019	RGT Planet	Cu	310	5.21	0.54	15.81
BBCH 43-45	2019	RGT Planet	Cu	314	5.19	0.6	16.3
BBCH 43-45	2019	RGT Planet	Cu	313	5.89	0.61	14.52
BBCH 43-45	2019	RGT Planet	Cu	310	5.62	0.55	15.73
BBCH 43-45	2019	RGT Planet	Cu	320	5.44	0.52	15.91
BBCH 43-45	2019	RGT Planet	Cu	314	5.4	0.51	15.14
BBCH 43-45	2019	RGT Planet	Cu	308	5.85	0.56	16.02
BBCH 43-45	2019	RGT Planet	Cu	311	5.9	0.5	16.2
BBCH 43-45	2019	RGT Planet	Cu	313	5.84	0.54	15.89
BBCH 43-45	2019	RGT Planet	Mn	290	4.92	0.5	15.36
BBCH 43-45	2019	RGT Planet	Mn	302	5.02	0.49	15.4
BBCH 43-45	2019	RGT Planet	Mn	311	5.15	0.52	16.02
BBCH 43-45	2019	RGT Planet	Mn	304	4.62	0.51	13.42
BBCH 43-45	2019	RGT Planet	Mn	278	5.28	0.5	14.52
BBCH 43-45	2019	RGT Planet	Mn	290	4.88	0.48	15.9
BBCH 43-45	2019	RGT Planet	Mn	282	5.21	0.44	15.47
BBCH 43-45	2019	RGT Planet	Mn	301	5.14	0.47	16.21
BBCH 43-45	2019	RGT Planet	Mn	300	4.8	0.51	16
BBCH 43-45	2019	RGT Planet	Mn	269	4.46	0.5	15.37
BBCH 43-45	2019	RGT Planet	Mn	280	4.9	0.53	15.4
BBCH 43-45	2019	RGT Planet	Mn	291	4.94	0.49	15.7
BBCH 43-45	2019	RGT Planet	Mo	290	5.09	0.55	15.5
BBCH 43-45	2019	RGT Planet	Mo	305	5.11	0.51	16.02
BBCH 43-45	2019	RGT Planet	Mo	311	4.84	0.54	15.84
BBCH 43-45	2019	RGT Planet	Mo	289	5.39	0.62	16.3
BBCH 43-45	2019	RGT Planet	Mo	288	5.3	0.58	15.77
BBCH 43-45	2019	RGT Planet	Mo	302	5.47	0.54	15.49
BBCH 43-45	2019	RGT Planet	Mo	311	5.18	0.55	15.8
BBCH 43-45	2019	RGT Planet	Mo	287	4.98	0.58	15.3
BBCH 43-45	2019	RGT Planet	Mo	290	5.36	0.61	16.2
BBCH 43-45	2019	RGT Planet	Mo	297	5.21	0.6	14.78
BBCH 43-45	2019	RGT Planet	Mo	302	5.63	0.59	15.8
BBCH 43-45	2019	RGT Planet	Mo	304	5.5	0.51	17.65
BBCH 43-45	2019	RGT Planet	Zn	302	5.9	0.55	15.3
BBCH 43-45	2019	RGT Planet	Zn	311	5.45	0.56	15.44
BBCH 43-45	2019	RGT Planet	Zn	308	4.92	0.5	15.6
BBCH 43-45	2019	RGT Planet	Zn	305	5.31	0.64	16
BBCH 43-45	2019	RGT Planet	Zn	299	5.51	0.64	15.5
BBCH 43-45	2019	RGT Planet	Zn	303	5.91	0.6	14.99
BBCH 43-45	2019	RGT Planet	Zn	315	5.62	0.58	14.7
BBCH 43-45	2019	RGT Planet	Zn	320	5.8	0.55	15.32
BBCH 43-45	2019	RGT Planet	Zn	297	5.55	0.54	15.4
BBCH 43-45	2019	RGT Planet	Zn	304	4.97	0.61	15.06
BBCH 43-45	2019	RGT Planet	Zn	301	5.79	0.57	14.88
BBCH 43-45	2019	RGT Planet	Zn	305	5.9	0.55	14.45
BBCH 43-45	2020	Baryłka	control	289	4.04	0.51	10.15
BBCH 43-45	2020	Baryłka	control	280	4.36	0.55	10.6
BBCH 43-45	2020	Baryłka	control	272	4.91	0.59	9.48
BBCH 43-45	2020	Baryłka	control	291	4.22	0.49	10.36
BBCH 43-45	2020	Baryłka	control	265	3.46	0.52	8.35
BBCH 43-45	2020	Baryłka	control	289	4.25	0.44	9.45
BBCH 43-45	2020	Baryłka	control	290	4.62	0.52	9.12
BBCH 43-45	2020	Baryłka	control	302	3.99	0.5	10.36
BBCH 43-45	2020	Baryłka	control	305	3.45	0.55	10.5
BBCH 43-45	2020	Baryłka	control	288	3.25	0.59	12.6
BBCH 43-45	2020	Baryłka	control	287	4.34	0.58	11.7
BBCH 43-45	2020	Baryłka	control	269	4.4	0.6	9.82
BBCH 43-45	2020	Baryłka	Cu	301	4.54	0.51	12.12
BBCH 43-45	2020	Baryłka	Cu	300	4.62	0.5	12.3
BBCH 43-45	2020	Baryłka	Cu	284	4.7	0.44	11.94
BBCH 43-45	2020	Baryłka	Cu	293	5.11	0.54	11.8
BBCH 43-45	2020	Baryłka	Cu	268	4.36	0.58	12.35
BBCH 43-45	2020	Baryłka	Cu	302	4.85	0.53	12.4
BBCH 43-45	2020	Baryłka	Cu	301	4.25	0.47	11.6
BBCH 43-45	2020	Baryłka	Cu	292	3.98	0.51	10.47
BBCH 43-45	2020	Baryłka	Cu	290	3.65	0.54	12.61
BBCH 43-45	2020	Baryłka	Cu	284	4.08	0.52	12.44
BBCH 43-45	2020	Baryłka	Cu	296	4.27	0.5	12.8
BBCH 43-45	2020	Baryłka	Cu	290	4.3	0.47	11.45
BBCH 43-45	2020	Baryłka	Mn	277	3.9	0.55	12.62
BBCH 43-45	2020	Baryłka	Mn	280	4.11	0.54	13.25
BBCH 43-45	2020	Baryłka	Mn	259	3.33	0.54	13
BBCH 43-45	2020	Baryłka	Mn	282	3.95	0.52	12.94
BBCH 43-45	2020	Baryłka	Mn	301	4.12	0.58	12.7
BBCH 43-45	2020	Baryłka	Mn	274	3.88	0.48	11.56
BBCH 43-45	2020	Baryłka	Mn	264	3.8	0.49	12.62
BBCH 43-45	2020	Baryłka	Mn	303	4.09	0.5	12.66
BBCH 43-45	2020	Baryłka	Mn	282	3.85	0.48	12.85
BBCH 43-45	2020	Baryłka	Mn	280	3.99	0.47	13.02
BBCH 43-45	2020	Baryłka	Mn	276	3.7	0.57	12.55
BBCH 43-45	2020	Baryłka	Mn	277	3.94	0.54	12.3
BBCH 43-45	2020	Baryłka	Mo	290	4	0.54	12.09
BBCH 43-45	2020	Baryłka	Mo	302	4.92	0.53	12.25
BBCH 43-45	2020	Baryłka	Mo	313	5.1	0.58	12.74
BBCH 43-45	2020	Baryłka	Mo	290	4.6	0.55	13.05
BBCH 43-45	2020	Baryłka	Mo	287	4.8	0.54	12.65
BBCH 43-45	2020	Baryłka	Mo	280	4.7	0.52	11.44
BBCH 43-45	2020	Baryłka	Mo	293	5.05	0.5	11.85
BBCH 43-45	2020	Baryłka	Mo	245	4.64	0.48	10.6
BBCH 43-45	2020	Baryłka	Mo	261	4.8	0.54	10.4
BBCH 43-45	2020	Baryłka	Mo	289	4.45	0.56	11.85
BBCH 43-45	2020	Baryłka	Mo	297	4.6	0.5	11.6
BBCH 43-45	2020	Baryłka	Mo	292	4.47	0.5	12
BBCH 43-45	2020	Baryłka	Zn	298	4.62	0.51	12.05
BBCH 43-45	2020	Baryłka	Zn	299	4.8	0.52	11.95
BBCH 43-45	2020	Baryłka	Zn	302	5.11	0.5	12.4
BBCH 43-45	2020	Baryłka	Zn	300	5	0.57	12.6
BBCH 43-45	2020	Baryłka	Zn	287	4.74	0.56	11.82
BBCH 43-45	2020	Baryłka	Zn	290	4.6	0.54	12.63
BBCH 43-45	2020	Baryłka	Zn	294	4.52	0.53	12.3
BBCH 43-45	2020	Baryłka	Zn	284	4.4	0.55	12.74
BBCH 43-45	2020	Baryłka	Zn	288	4.3	0.52	12.85
BBCH 43-45	2020	Baryłka	Zn	295	4.54	0.51	13.02
BBCH 43-45	2020	Baryłka	Zn	301	4.96	0.53	12.82
BBCH 43-45	2020	Baryłka	Zn	298	4.71	0.49	11.7
BBCH 43-45	2020	KWS Irina	control	285	3.7	0.56	12.8
BBCH 43-45	2020	KWS Irina	control	290	3.45	0.54	13.4
BBCH 43-45	2020	KWS Irina	control	279	3.25	0.51	12.4
BBCH 43-45	2020	KWS Irina	control	260	2.89	0.56	11.85
BBCH 43-45	2020	KWS Irina	control	262	3.61	0.55	11.6
BBCH 43-45	2020	KWS Irina	control	274	3.83	0.52	12
BBCH 43-45	2020	KWS Irina	control	280	3.5	0.56	12.8
BBCH 43-45	2020	KWS Irina	control	269	4.12	0.52	10.5
BBCH 43-45	2020	KWS Irina	control	297	3.52	0.58	10.4
BBCH 43-45	2020	KWS Irina	control	299	3.96	0.57	10.65
BBCH 43-45	2020	KWS Irina	control	301	4.35	0.55	11.91
BBCH 43-45	2020	KWS Irina	control	300	4.5	0.55	12.02
BBCH 43-45	2020	KWS Irina	Cu	280	4.15	0.51	15.02
BBCH 43-45	2020	KWS Irina	Cu	275	4.02	0.55	15
BBCH 43-45	2020	KWS Irina	Cu	270	3.5	0.52	14.6
BBCH 43-45	2020	KWS Irina	Cu	280	3.94	0.56	13.99
BBCH 43-45	2020	KWS Irina	Cu	276	3.99	0.54	14.5
BBCH 43-45	2020	KWS Irina	Cu	284	4.32	0.56	14.23
BBCH 43-45	2020	KWS Irina	Cu	280	4.25	0.5	14.89
BBCH 43-45	2020	KWS Irina	Cu	277	4.8	0.49	14.8
BBCH 43-45	2020	KWS Irina	Cu	282	4.82	0.58	15.02
BBCH 43-45	2020	KWS Irina	Cu	283	4.9	0.52	15.14
BBCH 43-45	2020	KWS Irina	Cu	278	4.2	0.5	14.96
BBCH 43-45	2020	KWS Irina	Cu	274	4.12	0.51	14.6
BBCH 43-45	2020	KWS Irina	Mn	289	4.6	0.59	14.4
BBCH 43-45	2020	KWS Irina	Mn	288	4.55	0.6	15.1
BBCH 43-45	2020	KWS Irina	Mn	279	4.4	0.57	14.92
BBCH 43-45	2020	KWS Irina	Mn	288	4.7	0.55	14.3
BBCH 43-45	2020	KWS Irina	Mn	302	5.12	0.58	15.2
BBCH 43-45	2020	KWS Irina	Mn	277	3.85	0.6	14.23
BBCH 43-45	2020	KWS Irina	Mn	291	3.91	0.54	14.69
BBCH 43-45	2020	KWS Irina	Mn	283	3.84	0.6	14.12
BBCH 43-45	2020	KWS Irina	Mn	287	4.62	0.58	13.69
BBCH 43-45	2020	KWS Irina	Mn	288	4.7	0.59	13.8
BBCH 43-45	2020	KWS Irina	Mn	292	5.12	0.6	14.05
BBCH 43-45	2020	KWS Irina	Mn	280	4.96	0.54	14.7
BBCH 43-45	2020	KWS Irina	Mo	252	4.52	0.55	12.4
BBCH 43-45	2020	KWS Irina	Mo	260	4.12	0.59	12.26
BBCH 43-45	2020	KWS Irina	Mo	249	4.3	0.48	12.5
BBCH 43-45	2020	KWS Irina	Mo	245	3.8	0.44	10.56
BBCH 43-45	2020	KWS Irina	Mo	261	4.62	0.52	11.63
BBCH 43-45	2020	KWS Irina	Mo	282	4.8	0.62	12.69
BBCH 43-45	2020	KWS Irina	Mo	290	5.12	0.63	14.05
BBCH 43-45	2020	KWS Irina	Mo	266	3.22	0.58	12.78
BBCH 43-45	2020	KWS Irina	Mo	245	3.41	0.54	13.85
BBCH 43-45	2020	KWS Irina	Mo	281	4.12	0.62	14.62
BBCH 43-45	2020	KWS Irina	Mo	270	3.89	0.58	15.41
BBCH 43-45	2020	KWS Irina	Mo	244	3.12	0.55	13.8
BBCH 43-45	2020	KWS Irina	Zn	290	4.51	0.52	12
BBCH 43-45	2020	KWS Irina	Zn	301	4.9	0.56	14.46
BBCH 43-45	2020	KWS Irina	Zn	312	5.13	0.58	15.5
BBCH 43-45	2020	KWS Irina	Zn	275	3.36	0.44	11.52
BBCH 43-45	2020	KWS Irina	Zn	295	4.14	0.47	13.85
BBCH 43-45	2020	KWS Irina	Zn	292	3.84	0.48	13.03
BBCH 43-45	2020	KWS Irina	Zn	301	4.55	0.51	14.05
BBCH 43-45	2020	KWS Irina	Zn	287	4.22	0.48	10.2
BBCH 43-45	2020	KWS Irina	Zn	290	4.46	0.52	12.82
BBCH 43-45	2020	KWS Irina	Zn	274	4.3	0.46	10.69
BBCH 43-45	2020	KWS Irina	Zn	296	4.2	0.48	12.85
BBCH 43-45	2020	KWS Irina	Zn	299	4.15	0.51	12.5
BBCH 43-45	2020	RGT Planet	control	259	4.35	0.44	10.6
BBCH 43-45	2020	RGT Planet	control	262	4.2	0.48	11.5
BBCH 43-45	2020	RGT Planet	control	288	4.18	0.5	12.36
BBCH 43-45	2020	RGT Planet	control	294	4.34	0.52	13.74
BBCH 43-45	2020	RGT Planet	control	266	4.5	0.45	10.74
BBCH 43-45	2020	RGT Planet	control	274	3.85	0.48	11.2
BBCH 43-45	2020	RGT Planet	control	282	4.6	0.51	13.36
BBCH 43-45	2020	RGT Planet	control	265	4.22	0.48	11.02
BBCH 43-45	2020	RGT Planet	control	255	4.15	0.46	11.5
BBCH 43-45	2020	RGT Planet	control	281	4.3	0.52	12.64
BBCH 43-45	2020	RGT Planet	control	272	4.8	0.55	12.8
BBCH 43-45	2020	RGT Planet	control	264	4.62	0.57	12.41
BBCH 43-45	2020	RGT Planet	Cu	302	4.42	0.47	14.52
BBCH 43-45	2020	RGT Planet	Cu	311	5.12	0.58	15.2
BBCH 43-45	2020	RGT Planet	Cu	285	4.36	0.52	13.21
BBCH 43-45	2020	RGT Planet	Cu	299	4.12	0.56	12.9
BBCH 43-45	2020	RGT Planet	Cu	304	4.6	0.58	15.52
BBCH 43-45	2020	RGT Planet	Cu	279	3.78	0.42	12.08
BBCH 43-45	2020	RGT Planet	Cu	258	3.45	0.41	10.25
BBCH 43-45	2020	RGT Planet	Cu	294	4.26	0.47	13.45
BBCH 43-45	2020	RGT Planet	Cu	299	4.76	0.49	14.2
BBCH 43-45	2020	RGT Planet	Cu	276	4.3	0.46	13.95
BBCH 43-45	2020	RGT Planet	Cu	281	4.61	0.45	14.99
BBCH 43-45	2020	RGT Planet	Cu	274	4.34	0.44	14.7
BBCH 43-45	2020	RGT Planet	Mn	292	5.12	0.49	13.25
BBCH 43-45	2020	RGT Planet	Mn	282	4.89	0.5	13.5
BBCH 43-45	2020	RGT Planet	Mn	286	4.92	0.48	13.05
BBCH 43-45	2020	RGT Planet	Mn	290	5.09	0.51	14
BBCH 43-45	2020	RGT Planet	Mn	301	5.42	0.56	15.02
BBCH 43-45	2020	RGT Planet	Mn	290	4.7	0.48	14.2
BBCH 43-45	2020	RGT Planet	Mn	288	4.65	0.56	13.99
BBCH 43-45	2020	RGT Planet	Mn	291	4.84	0.58	14.52
BBCH 43-45	2020	RGT Planet	Mn	301	4.92	0.6	14.6
BBCH 43-45	2020	RGT Planet	Mn	284	4.12	0.54	13.52
BBCH 43-45	2020	RGT Planet	Mn	275	4.65	0.55	12.9
BBCH 43-45	2020	RGT Planet	Mn	295	5.33	0.58	13.34
BBCH 43-45	2020	RGT Planet	Mo	290	4.8	0.5	14.9
BBCH 43-45	2020	RGT Planet	Mo	311	5.32	0.61	15.6
BBCH 43-45	2020	RGT Planet	Mo	305	5.2	0.6	15.02
BBCH 43-45	2020	RGT Planet	Mo	308	4.91	0.61	15
BBCH 43-45	2020	RGT Planet	Mo	285	4.61	0.54	13.52
BBCH 43-45	2020	RGT Planet	Mo	269	4.5	0.57	13.6
BBCH 43-45	2020	RGT Planet	Mo	275	4.2	0.5	13.68
BBCH 43-45	2020	RGT Planet	Mo	309	5.01	0.59	14.7
BBCH 43-45	2020	RGT Planet	Mo	301	4.94	0.58	14.8
BBCH 43-45	2020	RGT Planet	Mo	274	4.37	0.58	13.65
BBCH 43-45	2020	RGT Planet	Mo	279	4.42	0.57	13.7
BBCH 43-45	2020	RGT Planet	Mo	299	5.09	0.61	14
BBCH 43-45	2020	RGT Planet	Zn	291	4.51	0.58	14.3
BBCH 43-45	2020	RGT Planet	Zn	301	5.12	0.61	15.28
BBCH 43-45	2020	RGT Planet	Zn	313	5.2	0.63	15.4
BBCH 43-45	2020	RGT Planet	Zn	291	4.41	0.58	14.66
BBCH 43-45	2020	RGT Planet	Zn	302	5	0.59	15.09
BBCH 43-45	2020	RGT Planet	Zn	300	4.74	0.54	15
BBCH 43-45	2020	RGT Planet	Zn	284	4.5	0.55	13.74
BBCH 43-45	2020	RGT Planet	Zn	308	4.98	0.58	14.79
BBCH 43-45	2020	RGT Planet	Zn	311	5.02	0.6	15.17
BBCH 43-45	2020	RGT Planet	Zn	299	4.46	0.57	14.93
BBCH 43-45	2020	RGT Planet	Zn	274	4.35	0.52	13.8
BBCH 43-45	2020	RGT Planet	Zn	282	4.82	0.58	13.75
BBCH 43-45	2021	Baryłka	control	299	4.44	0.59	14.2
BBCH 43-45	2021	Baryłka	control	284	4.15	0.55	12.9
BBCH 43-45	2021	Baryłka	control	293	4.36	0.58	15.1
BBCH 43-45	2021	Baryłka	control	299	4.9	0.59	15.2
BBCH 43-45	2021	Baryłka	control	289	4.8	0.57	13.7
BBCH 43-45	2021	Baryłka	control	300	4.7	0.6	14.85
BBCH 43-45	2021	Baryłka	control	294	4.92	0.54	14.2
BBCH 43-45	2021	Baryłka	control	292	4.93	0.58	14.32
BBCH 43-45	2021	Baryłka	control	289	4.3	0.58	13.7
BBCH 43-45	2021	Baryłka	control	287	4.1	0.56	14.25
BBCH 43-45	2021	Baryłka	control	297	4.5	0.6	13.6
BBCH 43-45	2021	Baryłka	control	301	4.8	0.6	14
BBCH 43-45	2021	Baryłka	Cu	297	4.79	0.62	14.2
BBCH 43-45	2021	Baryłka	Cu	310	5.12	0.64	16.4
BBCH 43-45	2021	Baryłka	Cu	301	5.02	0.63	16.5
BBCH 43-45	2021	Baryłka	Cu	314	5.36	0.64	16.08
BBCH 43-45	2021	Baryłka	Cu	287	4.77	0.58	14.92
BBCH 43-45	2021	Baryłka	Cu	304	4.92	0.6	16.2
BBCH 43-45	2021	Baryłka	Cu	314	5.08	0.61	17.32
BBCH 43-45	2021	Baryłka	Cu	320	5.14	0.6	17
BBCH 43-45	2021	Baryłka	Cu	297	4.46	0.58	16.5
BBCH 43-45	2021	Baryłka	Cu	299	4.52	0.55	15.7
BBCH 43-45	2021	Baryłka	Cu	312	4.9	0.64	16
BBCH 43-45	2021	Baryłka	Cu	314	5.41	0.66	16.22
BBCH 43-45	2021	Baryłka	Mn	308	5.26	0.58	13.9
BBCH 43-45	2021	Baryłka	Mn	313	5.5	0.61	14.4
BBCH 43-45	2021	Baryłka	Mn	321	5.61	0.62	12.23
BBCH 43-45	2021	Baryłka	Mn	318	5.41	0.61	15.02
BBCH 43-45	2021	Baryłka	Mn	302	5.47	0.6	12.67
BBCH 43-45	2021	Baryłka	Mn	302	5.15	0.59	13.7
BBCH 43-45	2021	Baryłka	Mn	309	5.7	0.62	14.92
BBCH 43-45	2021	Baryłka	Mn	300	5.09	0.58	14.3
BBCH 43-45	2021	Baryłka	Mn	308	5.36	0.63	14.1
BBCH 43-45	2021	Baryłka	Mn	310	5.7	0.64	14.78
BBCH 43-45	2021	Baryłka	Mn	307	5.42	0.62	15.2
BBCH 43-45	2021	Baryłka	Mn	308	5.6	0.6	14.07
BBCH 43-45	2021	Baryłka	Mo	305	4.95	0.58	15
BBCH 43-45	2021	Baryłka	Mo	299	5	0.49	14.85
BBCH 43-45	2021	Baryłka	Mo	302	5.2	0.52	14.3
BBCH 43-45	2021	Baryłka	Mo	313	4.98	0.56	15
BBCH 43-45	2021	Baryłka	Mo	289	4.34	0.5	13.69
BBCH 43-45	2021	Baryłka	Mo	305	4.8	0.51	14.52
BBCH 43-45	2021	Baryłka	Mo	311	4.9	0.55	15.45
BBCH 43-45	2021	Baryłka	Mo	295	4.4	0.54	14.1
BBCH 43-45	2021	Baryłka	Mo	308	4.78	0.59	14.8
BBCH 43-45	2021	Baryłka	Mo	314	4.92	0.62	15.05
BBCH 43-45	2021	Baryłka	Mo	300	5.02	0.57	14.3
BBCH 43-45	2021	Baryłka	Mo	296	4.87	0.58	13.9
BBCH 43-45	2021	Baryłka	Zn	318	5.45	0.66	15.8
BBCH 43-45	2021	Baryłka	Zn	310	5.6	0.72	15.41
BBCH 43-45	2021	Baryłka	Zn	305	4.9	0.61	15
BBCH 43-45	2021	Baryłka	Zn	289	4.85	0.58	14.8
BBCH 43-45	2021	Baryłka	Zn	303	5.4	0.62	15.62
BBCH 43-45	2021	Baryłka	Zn	311	5.6	0.68	16
BBCH 43-45	2021	Baryłka	Zn	284	5.12	0.55	15.2
BBCH 43-45	2021	Baryłka	Zn	313	5.9	0.65	16.36
BBCH 43-45	2021	Baryłka	Zn	307	6.01	0.71	16.09
BBCH 43-45	2021	Baryłka	Zn	309	5.45	0.69	15.87
BBCH 43-45	2021	Baryłka	Zn	310	5.6	0.7	15.99
BBCH 43-45	2021	Baryłka	Zn	312	5.91	0.71	15.67
BBCH 43-45	2021	KWS Irina	control	299	4.99	0.6	14
BBCH 43-45	2021	KWS Irina	control	301	5.02	0.58	15.1
BBCH 43-45	2021	KWS Irina	control	305	5.15	0.62	15
BBCH 43-45	2021	KWS Irina	control	298	5	0.55	13.2
BBCH 43-45	2021	KWS Irina	control	299	4.8	0.58	12.95
BBCH 43-45	2021	KWS Irina	control	309	5.36	0.61	13.5
BBCH 43-45	2021	KWS Irina	control	304	5.6	0.6	13
BBCH 43-45	2021	KWS Irina	control	302	5.12	0.56	12.78
BBCH 43-45	2021	KWS Irina	control	289	5	0.54	12.88
BBCH 43-45	2021	KWS Irina	control	296	5.41	0.6	12.5
BBCH 43-45	2021	KWS Irina	control	302	5.8	0.62	13.69
BBCH 43-45	2021	KWS Irina	control	300	5.69	0.56	12
BBCH 43-45	2021	KWS Irina	Cu	320	5.4	0.6	12.7
BBCH 43-45	2021	KWS Irina	Cu	325	5.6	0.58	14.3
BBCH 43-45	2021	KWS Irina	Cu	314	5.52	0.56	12.4
BBCH 43-45	2021	KWS Irina	Cu	331	5.74	0.62	14.5
BBCH 43-45	2021	KWS Irina	Cu	323	5.6	0.65	13.95
BBCH 43-45	2021	KWS Irina	Cu	330	4.85	0.7	13.5
BBCH 43-45	2021	KWS Irina	Cu	328	5.09	0.52	13.9
BBCH 43-45	2021	KWS Irina	Cu	330	5.15	0.54	15.6
BBCH 43-45	2021	KWS Irina	Cu	325	4.8	0.5	14.21
BBCH 43-45	2021	KWS Irina	Cu	319	5.74	0.56	12.1
BBCH 43-45	2021	KWS Irina	Cu	324	6.02	0.59	15
BBCH 43-45	2021	KWS Irina	Cu	328	6.08	0.61	13.9
BBCH 43-45	2021	KWS Irina	Mn	310	6.1	0.56	14.8
BBCH 43-45	2021	KWS Irina	Mn	308	6.25	0.58	16
BBCH 43-45	2021	KWS Irina	Mn	312	5.82	0.56	15
BBCH 43-45	2021	KWS Irina	Mn	300	5.79	0.6	15.3
BBCH 43-45	2021	KWS Irina	Mn	284	5.62	0.58	15.65
BBCH 43-45	2021	KWS Irina	Mn	290	5.5	0.54	14.85
BBCH 43-45	2021	KWS Irina	Mn	302	6.2	0.56	15.02
BBCH 43-45	2021	KWS Irina	Mn	310	5.99	0.61	15.2
BBCH 43-45	2021	KWS Irina	Mn	323	6.11	0.63	16.46
BBCH 43-45	2021	KWS Irina	Mn	308	5.7	0.58	15.6
BBCH 43-45	2021	KWS Irina	Mn	314	5.84	0.6	16
BBCH 43-45	2021	KWS Irina	Mn	329	6.13	0.54	16.8
BBCH 43-45	2021	KWS Irina	Mo	323	6.05	0.56	15.6
BBCH 43-45	2021	KWS Irina	Mo	330	6.42	0.56	15.8
BBCH 43-45	2021	KWS Irina	Mo	308	6.25	0.5	15
BBCH 43-45	2021	KWS Irina	Mo	310	6.14	0.59	14.92
BBCH 43-45	2021	KWS Irina	Mo	326	6.32	0.67	16.5
BBCH 43-45	2021	KWS Irina	Mo	317	5.85	0.62	16.2
BBCH 43-45	2021	KWS Irina	Mo	315	5.9	0.59	15.5
BBCH 43-45	2021	KWS Irina	Mo	305	5.74	0.54	16.02
BBCH 43-45	2021	KWS Irina	Mo	320	5.7	0.58	15.98
BBCH 43-45	2021	KWS Irina	Mo	314	5.95	0.58	14
BBCH 43-45	2021	KWS Irina	Mo	310	6	0.54	14.74
BBCH 43-45	2021	KWS Irina	Mo	303	5.99	0.55	15.5
BBCH 43-45	2021	KWS Irina	Zn	310	6.1	0.61	16.5
BBCH 43-45	2021	KWS Irina	Zn	308	5.87	0.58	15.7
BBCH 43-45	2021	KWS Irina	Zn	312	5.6	0.62	15.62
BBCH 43-45	2021	KWS Irina	Zn	315	5.95	0.59	14.59
BBCH 43-45	2021	KWS Irina	Zn	310	5.9	0.64	15.92
BBCH 43-45	2021	KWS Irina	Zn	308	5.45	0.6	15.6
BBCH 43-45	2021	KWS Irina	Zn	323	6.32	0.66	16.46
BBCH 43-45	2021	KWS Irina	Zn	314	6.1	0.61	16.6
BBCH 43-45	2021	KWS Irina	Zn	308	5.92	0.62	15.91
BBCH 43-45	2021	KWS Irina	Zn	304	5.9	0.59	15.9
BBCH 43-45	2021	KWS Irina	Zn	310	6.03	0.57	16.4
BBCH 43-45	2021	KWS Irina	Zn	305	6.15	0.63	16.12
BBCH 43-45	2021	RGT Planet	control	301	5.41	0.6	16.9
BBCH 43-45	2021	RGT Planet	control	313	5.8	0.63	17.8
BBCH 43-45	2021	RGT Planet	control	287	4.95	0.62	17
BBCH 43-45	2021	RGT Planet	control	286	4.88	0.57	18.52
BBCH 43-45	2021	RGT Planet	control	302	5.02	0.6	18
BBCH 43-45	2021	RGT Planet	control	294	5.41	0.63	16.2
BBCH 43-45	2021	RGT Planet	control	289	5.12	0.64	16.4
BBCH 43-45	2021	RGT Planet	control	290	5.36	0.6	17.2
BBCH 43-45	2021	RGT Planet	control	302	6.21	0.67	17.35
BBCH 43-45	2021	RGT Planet	control	301	5.4	0.61	18.02
BBCH 43-45	2021	RGT Planet	control	296	5.2	0.6	17.8
BBCH 43-45	2021	RGT Planet	control	297	5.74	0.58	17.94
BBCH 43-45	2021	RGT Planet	Cu	308	5.4	0.58	18.8
BBCH 43-45	2021	RGT Planet	Cu	323	5.65	0.64	19.2
BBCH 43-45	2021	RGT Planet	Cu	330	5.8	0.67	19.2
BBCH 43-45	2021	RGT Planet	Cu	314	5.09	0.62	18.4
BBCH 43-45	2021	RGT Planet	Cu	320	5.51	0.68	19.5
BBCH 43-45	2021	RGT Planet	Cu	319	5.32	0.62	18.8
BBCH 43-45	2021	RGT Planet	Cu	321	5.1	0.65	19.6
BBCH 43-45	2021	RGT Planet	Cu	313	4.89	0.61	18.3
BBCH 43-45	2021	RGT Planet	Cu	305	4.65	0.6	18.3
BBCH 43-45	2021	RGT Planet	Cu	307	5.6	0.58	19.8
BBCH 43-45	2021	RGT Planet	Cu	311	5.4	0.58	19.2
BBCH 43-45	2021	RGT Planet	Cu	309	5.18	0.56	18.97
BBCH 43-45	2021	RGT Planet	Mn	302	5.2	0.58	16.87
BBCH 43-45	2021	RGT Planet	Mn	311	5.15	0.54	16.5
BBCH 43-45	2021	RGT Planet	Mn	323	6.02	0.61	18.25
BBCH 43-45	2021	RGT Planet	Mn	325	6.14	0.57	18.17
BBCH 43-45	2021	RGT Planet	Mn	319	5.52	0.59	17.3
BBCH 43-45	2021	RGT Planet	Mn	305	5.32	0.57	17.5
BBCH 43-45	2021	RGT Planet	Mn	307	5.15	0.58	17
BBCH 43-45	2021	RGT Planet	Mn	298	5.28	0.56	16.5
BBCH 43-45	2021	RGT Planet	Mn	311	5.14	0.58	18.09
BBCH 43-45	2021	RGT Planet	Mn	315	5.36	0.56	18.48
BBCH 43-45	2021	RGT Planet	Mn	306	4.9	0.54	18.74
BBCH 43-45	2021	RGT Planet	Mn	314	5.41	0.57	17.42
BBCH 43-45	2021	RGT Planet	Mo	303	5.65	0.51	15.89
BBCH 43-45	2021	RGT Planet	Mo	313	5.8	0.52	16.21
BBCH 43-45	2021	RGT Planet	Mo	308	4.99	0.49	16.5
BBCH 43-45	2021	RGT Planet	Mo	299	5.51	0.56	16.47
BBCH 43-45	2021	RGT Planet	Mo	279	4.8	0.51	15.74
BBCH 43-45	2021	RGT Planet	Mo	325	4.98	0.6	18.2
BBCH 43-45	2021	RGT Planet	Mo	316	5.26	0.52	17.1
BBCH 43-45	2021	RGT Planet	Mo	304	5.14	0.58	16.99
BBCH 43-45	2021	RGT Planet	Mo	302	5	0.49	17.85
BBCH 43-45	2021	RGT Planet	Mo	288	5.19	0.46	17.4
BBCH 43-45	2021	RGT Planet	Mo	294	5.32	0.51	16.69
BBCH 43-45	2021	RGT Planet	Mo	301	5.24	0.5	17.9
BBCH 43-45	2021	RGT Planet	Zn	305	5.55	0.49	17.25
BBCH 43-45	2021	RGT Planet	Zn	311	5.6	0.51	17.32
BBCH 43-45	2021	RGT Planet	Zn	289	4.97	0.48	16.5
BBCH 43-45	2021	RGT Planet	Zn	294	4.99	0.54	16.85
BBCH 43-45	2021	RGT Planet	Zn	323	5.62	0.56	17.6
BBCH 43-45	2021	RGT Planet	Zn	317	5.54	0.52	17.4
BBCH 43-45	2021	RGT Planet	Zn	320	5.25	0.48	17.28
BBCH 43-45	2021	RGT Planet	Zn	279	4.99	0.53	16.88
BBCH 43-45	2021	RGT Planet	Zn	284	5.3	0.52	16.79
BBCH 43-45	2021	RGT Planet	Zn	288	5.2	0.54	17.09
BBCH 43-45	2021	RGT Planet	Zn	304	5.31	0.51	17.15
BBCH 43-45	2021	RGT Planet	Zn	301	5.5	0.5	16.98
BBCH 50-52	2019	Baryłka	control	285	3.52	0.43	12.09
BBCH 50-52	2019	Baryłka	control	280	3.23	0.44	12.02
BBCH 50-52	2019	Baryłka	control	279	3.77	0.42	11.84
BBCH 50-52	2019	Baryłka	control	282	3.94	0.44	11.45
BBCH 50-52	2019	Baryłka	control	287	4.02	0.47	12.44
BBCH 50-52	2019	Baryłka	control	290	4.23	0.47	12.6
BBCH 50-52	2019	Baryłka	control	274	4.14	0.45	12.84
BBCH 50-52	2019	Baryłka	control	282	3.85	0.46	11.48
BBCH 50-52	2019	Baryłka	control	275	3.51	0.48	11.95
BBCH 50-52	2019	Baryłka	control	280	3.44	0.4	12.5
BBCH 50-52	2019	Baryłka	control	294	4.35	0.48	12.08
BBCH 50-52	2019	Baryłka	control	282	4.06	0.44	11.7
BBCH 50-52	2019	Baryłka	Cu	295	4.2	0.44	14
BBCH 50-52	2019	Baryłka	Cu	290	4.43	0.47	14.22
BBCH 50-52	2019	Baryłka	Cu	292	4.02	0.47	14.6
BBCH 50-52	2019	Baryłka	Cu	297	3.65	0.46	13.9
BBCH 50-52	2019	Baryłka	Cu	300	3.83	0.48	14.3
BBCH 50-52	2019	Baryłka	Cu	294	4.32	0.46	14.2
BBCH 50-52	2019	Baryłka	Cu	290	4.44	0.47	14.7
BBCH 50-52	2019	Baryłka	Cu	294	4.5	0.44	13.97
BBCH 50-52	2019	Baryłka	Cu	294	4.25	0.45	14.8
BBCH 50-52	2019	Baryłka	Cu	293	4.35	0.48	13.95
BBCH 50-52	2019	Baryłka	Cu	290	4.4	0.48	14.2
BBCH 50-52	2019	Baryłka	Cu	300	3.65	0.44	13.94
BBCH 50-52	2019	Baryłka	Mn	288	3.51	0.46	13.4
BBCH 50-52	2019	Baryłka	Mn	289	3.3	0.45	12.4
BBCH 50-52	2019	Baryłka	Mn	295	3.21	0.43	13.52
BBCH 50-52	2019	Baryłka	Mn	292	3.55	0.48	13.11
BBCH 50-52	2019	Baryłka	Mn	284	3.6	0.46	13.65
BBCH 50-52	2019	Baryłka	Mn	282	3.33	0.44	14.1
BBCH 50-52	2019	Baryłka	Mn	280	3.41	0.45	14.23
BBCH 50-52	2019	Baryłka	Mn	281	3.28	0.45	13.5
BBCH 50-52	2019	Baryłka	Mn	292	3.55	0.45	12.5
BBCH 50-52	2019	Baryłka	Mn	286	3.28	0.49	14.4
BBCH 50-52	2019	Baryłka	Mn	288	3.29	0.41	14.48
BBCH 50-52	2019	Baryłka	Mn	281	3.5	0.46	12.52
BBCH 50-52	2019	Baryłka	Mo	288	4.01	0.53	14.1
BBCH 50-52	2019	Baryłka	Mo	287	4	0.55	14.2
BBCH 50-52	2019	Baryłka	Mo	280	3.88	0.54	13.7
BBCH 50-52	2019	Baryłka	Mo	285	3.55	0.5	14.2
BBCH 50-52	2019	Baryłka	Mo	280	3.46	0.48	13.8
BBCH 50-52	2019	Baryłka	Mo	282	3.6	0.49	13.8
BBCH 50-52	2019	Baryłka	Mo	287	3.75	0.51	14.2
BBCH 50-52	2019	Baryłka	Mo	288	3.8	0.5	14.14
BBCH 50-52	2019	Baryłka	Mo	285	3.95	0.54	13.7
BBCH 50-52	2019	Baryłka	Mo	290	3.9	0.51	13.66
BBCH 50-52	2019	Baryłka	Mo	286	3.34	0.53	14.14
BBCH 50-52	2019	Baryłka	Mo	279	3.8	0.48	14.5
BBCH 50-52	2019	Baryłka	Zn	288	4.14	0.44	14.2
BBCH 50-52	2019	Baryłka	Zn	284	3.85	0.5	14.54
BBCH 50-52	2019	Baryłka	Zn	290	4.01	0.54	15.1
BBCH 50-52	2019	Baryłka	Zn	294	4	0.44	15.15
BBCH 50-52	2019	Baryłka	Zn	292	3.81	0.45	14.7
BBCH 50-52	2019	Baryłka	Zn	291	4.15	0.45	14.22
BBCH 50-52	2019	Baryłka	Zn	289	4.1	0.44	14.3
BBCH 50-52	2019	Baryłka	Zn	292	4.18	0.46	14.6
BBCH 50-52	2019	Baryłka	Zn	290	3.9	0.43	14.7
BBCH 50-52	2019	Baryłka	Zn	289	3.98	0.44	14.04
BBCH 50-52	2019	Baryłka	Zn	296	4.01	0.46	14.4
BBCH 50-52	2019	Baryłka	Zn	285	4.23	0.53	15.27
BBCH 50-52	2019	KWS Irina	control	280	4.01	0.47	15.1
BBCH 50-52	2019	KWS Irina	control	270	3.99	0.44	14.2
BBCH 50-52	2019	KWS Irina	control	272	3.85	0.52	14.33
BBCH 50-52	2019	KWS Irina	control	277	3.7	0.48	14.2
BBCH 50-52	2019	KWS Irina	control	280	3.94	0.49	14.8
BBCH 50-52	2019	KWS Irina	control	277	4.02	0.5	14.5
BBCH 50-52	2019	KWS Irina	control	274	4	0.47	14.5
BBCH 50-52	2019	KWS Irina	control	281	3.7	0.47	14.3
BBCH 50-52	2019	KWS Irina	control	287	3.98	0.42	14.12
BBCH 50-52	2019	KWS Irina	control	270	4	0.45	14.4
BBCH 50-52	2019	KWS Irina	control	269	3.87	0.5	14.5
BBCH 50-52	2019	KWS Irina	control	280	3.8	0.57	15
BBCH 50-52	2019	KWS Irina	Cu	292	4.5	0.55	16
BBCH 50-52	2019	KWS Irina	Cu	295	4.54	0.54	15.8
BBCH 50-52	2019	KWS Irina	Cu	290	4.8	0.52	16.77
BBCH 50-52	2019	KWS Irina	Cu	289	4.82	0.52	16.85
BBCH 50-52	2019	KWS Irina	Cu	291	4.78	0.54	15.7
BBCH 50-52	2019	KWS Irina	Cu	294	4.9	0.5	15.82
BBCH 50-52	2019	KWS Irina	Cu	288	4.85	0.51	16
BBCH 50-52	2019	KWS Irina	Cu	290	4.8	0.53	16.5
BBCH 50-52	2019	KWS Irina	Cu	292	4.51	0.55	16.2
BBCH 50-52	2019	KWS Irina	Cu	290	4.98	0.52	15.98
BBCH 50-52	2019	KWS Irina	Cu	289	4.89	0.53	16.1
BBCH 50-52	2019	KWS Irina	Cu	295	4.61	0.54	16.45
BBCH 50-52	2019	KWS Irina	Mn	285	4.42	0.61	15.4
BBCH 50-52	2019	KWS Irina	Mn	286	4.22	0.52	15.35
BBCH 50-52	2019	KWS Irina	Mn	287	4.45	0.58	15.45
BBCH 50-52	2019	KWS Irina	Mn	287	4.52	0.6	15.01
BBCH 50-52	2019	KWS Irina	Mn	282	4.22	0.62	15
BBCH 50-52	2019	KWS Irina	Mn	286	4.23	0.62	15.6
BBCH 50-52	2019	KWS Irina	Mn	288	4.6	0.59	16
BBCH 50-52	2019	KWS Irina	Mn	284	4.45	0.61	15.2
BBCH 50-52	2019	KWS Irina	Mn	283	4.23	0.53	15.8
BBCH 50-52	2019	KWS Irina	Mn	281	4.12	0.49	15.02
BBCH 50-52	2019	KWS Irina	Mn	289	4.2	0.65	15.58
BBCH 50-52	2019	KWS Irina	Mn	290	4.99	0.7	15.11
BBCH 50-52	2019	KWS Irina	Mo	299	4.8	0.62	15.25
BBCH 50-52	2019	KWS Irina	Mo	300	4.62	0.61	16.1
BBCH 50-52	2019	KWS Irina	Mo	289	4.58	0.58	16.45
BBCH 50-52	2019	KWS Irina	Mo	301	4.75	0.55	15.5
BBCH 50-52	2019	KWS Irina	Mo	300	4.82	0.56	15.25
BBCH 50-52	2019	KWS Irina	Mo	301	4.7	0.6	15.3
BBCH 50-52	2019	KWS Irina	Mo	299	4.69	0.61	15.55
BBCH 50-52	2019	KWS Irina	Mo	299	4.72	0.59	15.9
BBCH 50-52	2019	KWS Irina	Mo	295	4.82	0.63	14.71
BBCH 50-52	2019	KWS Irina	Mo	300	4.75	0.61	15.23
BBCH 50-52	2019	KWS Irina	Mo	302	4.62	0.55	16.5
BBCH 50-52	2019	KWS Irina	Mo	297	4.68	0.59	16.2
BBCH 50-52	2019	KWS Irina	Zn	292	4.65	0.55	15.1
BBCH 50-52	2019	KWS Irina	Zn	294	4.45	0.54	15.2
BBCH 50-52	2019	KWS Irina	Zn	290	4.5	0.58	14.41
BBCH 50-52	2019	KWS Irina	Zn	289	4.45	0.61	14.5
BBCH 50-52	2019	KWS Irina	Zn	291	4.3	0.58	14.1
BBCH 50-52	2019	KWS Irina	Zn	290	4.52	0.56	13.9
BBCH 50-52	2019	KWS Irina	Zn	288	4.5	0.52	14.52
BBCH 50-52	2019	KWS Irina	Zn	289	4.61	0.56	15.1
BBCH 50-52	2019	KWS Irina	Zn	292	4.41	0.53	13.2
BBCH 50-52	2019	KWS Irina	Zn	290	4.32	0.57	15.45
BBCH 50-52	2019	KWS Irina	Zn	288	4.65	0.6	15.6
BBCH 50-52	2019	KWS Irina	Zn	291	4.63	0.54	14.2
BBCH 50-52	2019	RGT Planet	control	298	4.25	0.61	14.5
BBCH 50-52	2019	RGT Planet	control	295	4.5	0.55	14.78
BBCH 50-52	2019	RGT Planet	control	290	4.4	0.58	13.92
BBCH 50-52	2019	RGT Planet	control	289	4.62	0.52	14.4
BBCH 50-52	2019	RGT Planet	control	292	4.2	0.55	13.72
BBCH 50-52	2019	RGT Planet	control	290	4.44	0.56	13.81
BBCH 50-52	2019	RGT Planet	control	291	4.35	0.53	14.1
BBCH 50-52	2019	RGT Planet	control	291	4.38	0.52	14.7
BBCH 50-52	2019	RGT Planet	control	285	4.21	0.57	12.2
BBCH 50-52	2019	RGT Planet	control	295	4.55	0.51	14.7
BBCH 50-52	2019	RGT Planet	control	300	4.62	0.56	15.2
BBCH 50-52	2019	RGT Planet	control	290	4.21	0.58	14.93
BBCH 50-52	2019	RGT Planet	Cu	310	5.61	0.5	15.6
BBCH 50-52	2019	RGT Planet	Cu	311	5.11	0.55	16.01
BBCH 50-52	2019	RGT Planet	Cu	314	5.23	0.54	15.8
BBCH 50-52	2019	RGT Planet	Cu	312	5.31	0.51	15.52
BBCH 50-52	2019	RGT Planet	Cu	310	5.42	0.52	14.98
BBCH 50-52	2019	RGT Planet	Cu	311	5.11	0.53	14.8
BBCH 50-52	2019	RGT Planet	Cu	309	5.44	0.49	15.5
BBCH 50-52	2019	RGT Planet	Cu	311	5.3	0.52	15.58
BBCH 50-52	2019	RGT Planet	Cu	310	5.35	0.53	15.91
BBCH 50-52	2019	RGT Planet	Cu	312	5.48	0.49	14.5
BBCH 50-52	2019	RGT Planet	Cu	308	5.2	0.56	14.62
BBCH 50-52	2019	RGT Planet	Cu	315	5.21	0.52	16.85
BBCH 50-52	2019	RGT Planet	Mn	290	4.74	0.48	15.2
BBCH 50-52	2019	RGT Planet	Mn	288	4.8	0.5	15.13
BBCH 50-52	2019	RGT Planet	Mn	286	4.65	0.45	14.77
BBCH 50-52	2019	RGT Planet	Mn	282	4.44	0.47	15.14
BBCH 50-52	2019	RGT Planet	Mn	288	4.8	0.41	14.55
BBCH 50-52	2019	RGT Planet	Mn	290	4.82	0.44	15.6
BBCH 50-52	2019	RGT Planet	Mn	288	5.01	0.5	15.33
BBCH 50-52	2019	RGT Planet	Mn	287	4.5	0.48	15.8
BBCH 50-52	2019	RGT Planet	Mn	290	5.36	0.48	14.21
BBCH 50-52	2019	RGT Planet	Mn	286	4.25	0.46	15.98
BBCH 50-52	2019	RGT Planet	Mn	289	4.77	0.55	15.98
BBCH 50-52	2019	RGT Planet	Mn	285	4.49	0.42	14.56
BBCH 50-52	2019	RGT Planet	Mo	288	5.45	0.53	15.3
BBCH 50-52	2019	RGT Planet	Mo	285	5.5	0.53	15.1
BBCH 50-52	2019	RGT Planet	Mo	289	5.24	0.55	15.6
BBCH 50-52	2019	RGT Planet	Mo	290	4.82	0.55	15.55
BBCH 50-52	2019	RGT Planet	Mo	288	4.75	0.58	15.9
BBCH 50-52	2019	RGT Planet	Mo	289	5.33	0.54	15.35
BBCH 50-52	2019	RGT Planet	Mo	286	5.4	0.52	15.4
BBCH 50-52	2019	RGT Planet	Mo	286	5.01	0.53	15.6
BBCH 50-52	2019	RGT Planet	Mo	288	5.51	0.53	15.41
BBCH 50-52	2019	RGT Planet	Mo	286	4.59	0.55	15.23
BBCH 50-52	2019	RGT Planet	Mo	285	5.38	0.51	15.51
BBCH 50-52	2019	RGT Planet	Mo	289	5.28	0.58	15.76
BBCH 50-52	2019	RGT Planet	Zn	302	5.52	0.55	14.9
BBCH 50-52	2019	RGT Planet	Zn	308	5.6	0.54	15.1
BBCH 50-52	2019	RGT Planet	Zn	299	5.14	0.5	15.22
BBCH 50-52	2019	RGT Planet	Zn	291	5.44	0.56	14.82
BBCH 50-52	2019	RGT Planet	Zn	295	5.25	0.54	14.9
BBCH 50-52	2019	RGT Planet	Zn	299	5.2	0.55	15.02
BBCH 50-52	2019	RGT Planet	Zn	302	5.45	0.55	14.66
BBCH 50-52	2019	RGT Planet	Zn	305	5.7	0.54	14.75
BBCH 50-52	2019	RGT Planet	Zn	300	5.25	0.52	14.6
BBCH 50-52	2019	RGT Planet	Zn	315	5.35	0.53	15.02
BBCH 50-52	2019	RGT Planet	Zn	298	5.8	0.58	15.23
BBCH 50-52	2019	RGT Planet	Zn	290	5.21	0.55	14.84
BBCH 50-52	2020	Baryłka	control	283	4.23	0.56	10.12
BBCH 50-52	2020	Baryłka	control	280	4.3	0.52	9.85
BBCH 50-52	2020	Baryłka	control	282	3.87	0.49	9.44
BBCH 50-52	2020	Baryłka	control	284	3.8	0.55	9.74
BBCH 50-52	2020	Baryłka	control	283	3.75	0.51	9.99
BBCH 50-52	2020	Baryłka	control	283	4.12	0.52	10.02
BBCH 50-52	2020	Baryłka	control	280	4.44	0.57	9.74
BBCH 50-52	2020	Baryłka	control	283	3.78	0.52	9.82
BBCH 50-52	2020	Baryłka	control	287	3.78	0.54	10.14
BBCH 50-52	2020	Baryłka	control	289	4.59	0.57	10.21
BBCH 50-52	2020	Baryłka	control	285	3.6	0.48	9.46
BBCH 50-52	2020	Baryłka	control	268	4.16	0.55	9.51
BBCH 50-52	2020	Baryłka	Cu	292	4.21	0.5	12.02
BBCH 50-52	2020	Baryłka	Cu	280	4.15	0.49	10.58
BBCH 50-52	2020	Baryłka	Cu	285	4.2	0.45	11.02
BBCH 50-52	2020	Baryłka	Cu	292	4.35	0.44	11.57
BBCH 50-52	2020	Baryłka	Cu	298	4.12	0.57	12.22
BBCH 50-52	2020	Baryłka	Cu	297	4.02	0.46	12.52
BBCH 50-52	2020	Baryłka	Cu	287	4.1	0.47	12.25
BBCH 50-52	2020	Baryłka	Cu	285	4.34	0.47	11.48
BBCH 50-52	2020	Baryłka	Cu	287	4.44	0.58	12.66
BBCH 50-52	2020	Baryłka	Cu	292	4.11	0.51	12.01
BBCH 50-52	2020	Baryłka	Cu	298	4.08	0.43	10.14
BBCH 50-52	2020	Baryłka	Cu	282	4.12	0.43	12.03
BBCH 50-52	2020	Baryłka	Mn	272	3.89	0.49	12.14
BBCH 50-52	2020	Baryłka	Mn	276	3.8	0.57	12.51
BBCH 50-52	2020	Baryłka	Mn	280	3.75	0.54	12.7
BBCH 50-52	2020	Baryłka	Mn	278	3.88	0.55	12
BBCH 50-52	2020	Baryłka	Mn	277	4.21	0.58	12.24
BBCH 50-52	2020	Baryłka	Mn	275	4.02	0.49	12.57
BBCH 50-52	2020	Baryłka	Mn	270	3.67	0.53	12.47
BBCH 50-52	2020	Baryłka	Mn	278	3.7	0.56	12.7
BBCH 50-52	2020	Baryłka	Mn	271	3.61	0.59	12.4
BBCH 50-52	2020	Baryłka	Mn	286	3.75	0.48	12.27
BBCH 50-52	2020	Baryłka	Mn	269	3.76	0.54	12.93
BBCH 50-52	2020	Baryłka	Mn	278	4.33	0.55	12.11
BBCH 50-52	2020	Baryłka	Mo	284	4.65	0.51	12.02
BBCH 50-52	2020	Baryłka	Mo	285	4.21	0.5	12.3
BBCH 50-52	2020	Baryłka	Mo	288	4.12	0.49	11.2
BBCH 50-52	2020	Baryłka	Mo	287	4.68	0.49	11.54
BBCH 50-52	2020	Baryłka	Mo	284	4.98	0.55	12.02
BBCH 50-52	2020	Baryłka	Mo	282	4.77	0.56	11.9
BBCH 50-52	2020	Baryłka	Mo	283	4.55	0.56	11.62
BBCH 50-52	2020	Baryłka	Mo	275	4.5	0.51	11.22
BBCH 50-52	2020	Baryłka	Mo	271	4.55	0.57	12.22
BBCH 50-52	2020	Baryłka	Mo	283	4.53	0.55	11.55
BBCH 50-52	2020	Baryłka	Mo	282	4.57	0.47	12.46
BBCH 50-52	2020	Baryłka	Mo	299	4.58	0.49	10.7
BBCH 50-52	2020	Baryłka	Zn	290	4.44	0.52	10.99
BBCH 50-52	2020	Baryłka	Zn	289	4.85	0.49	12.2
BBCH 50-52	2020	Baryłka	Zn	293	4.36	0.49	12.54
BBCH 50-52	2020	Baryłka	Zn	293	4.57	0.52	13.02
BBCH 50-52	2020	Baryłka	Zn	292	4.67	0.53	11.25
BBCH 50-52	2020	Baryłka	Zn	295	4.5	0.54	11.78
BBCH 50-52	2020	Baryłka	Zn	294	4.72	0.52	11.9
BBCH 50-52	2020	Baryłka	Zn	292	4.54	0.49	11.92
BBCH 50-52	2020	Baryłka	Zn	289	5.02	0.54	13.19
BBCH 50-52	2020	Baryłka	Zn	292	5.08	0.55	13.14
BBCH 50-52	2020	Baryłka	Zn	295	4.02	0.47	10.64
BBCH 50-52	2020	Baryłka	Zn	292	4.16	0.48	10.83
BBCH 50-52	2020	KWS Irina	control	283	3.82	0.52	12
BBCH 50-52	2020	KWS Irina	control	280	3.9	0.54	11.85
BBCH 50-52	2020	KWS Irina	control	283	3.44	0.55	11.23
BBCH 50-52	2020	KWS Irina	control	285	3.45	0.52	12.01
BBCH 50-52	2020	KWS Irina	control	288	3.7	0.52	11.25
BBCH 50-52	2020	KWS Irina	control	275	3.66	0.56	11.85
BBCH 50-52	2020	KWS Irina	control	280	3.8	0.54	11.98
BBCH 50-52	2020	KWS Irina	control	283	3.55	0.51	11.52
BBCH 50-52	2020	KWS Irina	control	273	3.74	0.58	12.04
BBCH 50-52	2020	KWS Irina	control	282	3.65	0.53	11.94
BBCH 50-52	2020	KWS Irina	control	290	3.45	0.52	10.95
BBCH 50-52	2020	KWS Irina	control	285	3.85	0.49	11.95
BBCH 50-52	2020	KWS Irina	Cu	282	4.35	0.52	14.12
BBCH 50-52	2020	KWS Irina	Cu	275	4.38	0.51	13.88
BBCH 50-52	2020	KWS Irina	Cu	274	3.77	0.54	13.54
BBCH 50-52	2020	KWS Irina	Cu	262	3.58	0.54	16.25
BBCH 50-52	2020	KWS Irina	Cu	280	3.66	0.49	16.3
BBCH 50-52	2020	KWS Irina	Cu	271	4.11	0.48	14.88
BBCH 50-52	2020	KWS Irina	Cu	272	4.22	0.51	15.02
BBCH 50-52	2020	KWS Irina	Cu	270	4.51	0.52	13.88
BBCH 50-52	2020	KWS Irina	Cu	282	3.44	0.46	13.49
BBCH 50-52	2020	KWS Irina	Cu	267	4.55	0.56	14.66
BBCH 50-52	2020	KWS Irina	Cu	258	4.02	0.5	17.1
BBCH 50-52	2020	KWS Irina	Cu	287	4.23	0.54	13.58
BBCH 50-52	2020	KWS Irina	Mn	285	4.5	0.61	13.52
BBCH 50-52	2020	KWS Irina	Mn	278	4.78	0.62	13.77
BBCH 50-52	2020	KWS Irina	Mn	280	4.65	0.59	15.42
BBCH 50-52	2020	KWS Irina	Mn	285	4.44	0.58	14.23
BBCH 50-52	2020	KWS Irina	Mn	290	4.21	0.57	14.45
BBCH 50-52	2020	KWS Irina	Mn	288	4.52	0.6	15.01
BBCH 50-52	2020	KWS Irina	Mn	285	4.3	0.59	14
BBCH 50-52	2020	KWS Irina	Mn	284	4.52	0.58	13.55
BBCH 50-52	2020	KWS Irina	Mn	286	4.28	0.57	14.18
BBCH 50-52	2020	KWS Irina	Mn	287	4.8	0.62	15.24
BBCH 50-52	2020	KWS Irina	Mn	279	4.38	0.52	13.28
BBCH 50-52	2020	KWS Irina	Mn	284	4.5	0.58	14.22
BBCH 50-52	2020	KWS Irina	Mo	245	4.02	0.52	14.1
BBCH 50-52	2020	KWS Irina	Mo	250	3.88	0.53	14.2
BBCH 50-52	2020	KWS Irina	Mo	235	3.75	0.55	13.8
BBCH 50-52	2020	KWS Irina	Mo	244	3.9	0.58	13.7
BBCH 50-52	2020	KWS Irina	Mo	250	4.01	0.57	13.77
BBCH 50-52	2020	KWS Irina	Mo	248	3.78	0.54	13.99
BBCH 50-52	2020	KWS Irina	Mo	235	3.8	0.55	14.1
BBCH 50-52	2020	KWS Irina	Mo	252	3.87	0.53	14.05
BBCH 50-52	2020	KWS Irina	Mo	215	3.58	0.52	14.28
BBCH 50-52	2020	KWS Irina	Mo	272	3.88	0.58	13.07
BBCH 50-52	2020	KWS Irina	Mo	270	3.05	0.56	14.6
BBCH 50-52	2020	KWS Irina	Mo	222	4.98	0.51	13.9
BBCH 50-52	2020	KWS Irina	Zn	301	4.21	0.51	13
BBCH 50-52	2020	KWS Irina	Zn	302	4.02	0.52	12.8
BBCH 50-52	2020	KWS Irina	Zn	299	3.99	0.5	12.74
BBCH 50-52	2020	KWS Irina	Zn	288	4.21	0.47	12.42
BBCH 50-52	2020	KWS Irina	Zn	280	4.33	0.47	11.98
BBCH 50-52	2020	KWS Irina	Zn	282	4.14	0.51	12.1
BBCH 50-52	2020	KWS Irina	Zn	280	4.05	0.49	12.73
BBCH 50-52	2020	KWS Irina	Zn	277	4.17	0.5	12.45
BBCH 50-52	2020	KWS Irina	Zn	305	3.92	0.49	11.22
BBCH 50-52	2020	KWS Irina	Zn	291	4.43	0.57	12.11
BBCH 50-52	2020	KWS Irina	Zn	281	3.83	0.44	12.81
BBCH 50-52	2020	KWS Irina	Zn	278	4.38	0.48	13.94
BBCH 50-52	2020	RGT Planet	control	265	4.3	0.49	11.45
BBCH 50-52	2020	RGT Planet	control	266	4.11	0.51	12.55
BBCH 50-52	2020	RGT Planet	control	258	4.25	0.5	12.47
BBCH 50-52	2020	RGT Planet	control	264	4.12	0.48	11.45
BBCH 50-52	2020	RGT Planet	control	268	3.99	0.47	12.42
BBCH 50-52	2020	RGT Planet	control	266	3.82	0.46	12.35
BBCH 50-52	2020	RGT Planet	control	262	4.22	0.45	11.85
BBCH 50-52	2020	RGT Planet	control	270	4.35	0.48	11.75
BBCH 50-52	2020	RGT Planet	control	254	4.2	0.45	11.35
BBCH 50-52	2020	RGT Planet	control	270	4.31	0.45	11.86
BBCH 50-52	2020	RGT Planet	control	265	4.12	0.58	12.76
BBCH 50-52	2020	RGT Planet	control	268	4.24	0.44	12.08
BBCH 50-52	2020	RGT Planet	Cu	282	4.32	0.48	13.2
BBCH 50-52	2020	RGT Planet	Cu	285	4.2	0.52	13.83
BBCH 50-52	2020	RGT Planet	Cu	270	4.15	0.54	12.65
BBCH 50-52	2020	RGT Planet	Cu	271	4.19	0.55	12.9
BBCH 50-52	2020	RGT Planet	Cu	282	4.28	0.44	13.63
BBCH 50-52	2020	RGT Planet	Cu	283	4.32	0.42	13.98
BBCH 50-52	2020	RGT Planet	Cu	286	4.44	0.42	14.2
BBCH 50-52	2020	RGT Planet	Cu	289	4.3	0.41	15.1
BBCH 50-52	2020	RGT Planet	Cu	279	4.25	0.43	13.15
BBCH 50-52	2020	RGT Planet	Cu	282	4.21	0.44	13.81
BBCH 50-52	2020	RGT Planet	Cu	267	4.1	0.44	12.37
BBCH 50-52	2020	RGT Planet	Cu	297	4.55	0.59	15.4
BBCH 50-52	2020	RGT Planet	Mn	285	5.11	0.5	12.9
BBCH 50-52	2020	RGT Planet	Mn	289	4.9	0.49	13.02
BBCH 50-52	2020	RGT Planet	Mn	290	4.88	0.58	13.3
BBCH 50-52	2020	RGT Planet	Mn	285	4.8	0.62	11.98
BBCH 50-52	2020	RGT Planet	Mn	281	4.51	0.6	13.45
BBCH 50-52	2020	RGT Planet	Mn	280	4.71	0.52	13.11
BBCH 50-52	2020	RGT Planet	Mn	288	4.81	0.48	13.21
BBCH 50-52	2020	RGT Planet	Mn	290	4.8	0.47	13.44
BBCH 50-52	2020	RGT Planet	Mn	292	5.13	0.68	13.53
BBCH 50-52	2020	RGT Planet	Mn	285	5.21	0.48	11.71
BBCH 50-52	2020	RGT Planet	Mn	271	4.15	0.54	12.06
BBCH 50-52	2020	RGT Planet	Mn	297	4.76	0.42	14.94
BBCH 50-52	2020	RGT Planet	Mo	288	4.8	0.58	13.8
BBCH 50-52	2020	RGT Planet	Mo	290	4.25	0.54	13.25
BBCH 50-52	2020	RGT Planet	Mo	294	4.74	0.56	13.45
BBCH 50-52	2020	RGT Planet	Mo	289	4.9	0.54	14.01
BBCH 50-52	2020	RGT Planet	Mo	277	4.75	0.5	14.12
BBCH 50-52	2020	RGT Planet	Mo	274	4.66	0.57	13.56
BBCH 50-52	2020	RGT Planet	Mo	282	4.52	0.58	13.44
BBCH 50-52	2020	RGT Planet	Mo	290	4.5	0.57	13.8
BBCH 50-52	2020	RGT Planet	Mo	292	4.78	0.58	14.33
BBCH 50-52	2020	RGT Planet	Mo	264	4.52	0.5	14.29
BBCH 50-52	2020	RGT Planet	Mo	298	4.71	0.64	13.72
BBCH 50-52	2020	RGT Planet	Mo	290	4.51	0.51	12.36
BBCH 50-52	2020	RGT Planet	Zn	290	4.2	0.55	14.42
BBCH 50-52	2020	RGT Planet	Zn	289	4.11	0.53	15.1
BBCH 50-52	2020	RGT Planet	Zn	290	4.45	0.54	14.6
BBCH 50-52	2020	RGT Planet	Zn	301	4.5	0.54	14.56
BBCH 50-52	2020	RGT Planet	Zn	300	4.36	0.58	14.33
BBCH 50-52	2020	RGT Planet	Zn	288	4.4	0.58	14.44
BBCH 50-52	2020	RGT Planet	Zn	289	4.6	0.55	14.5
BBCH 50-52	2020	RGT Planet	Zn	284	4.2	0.54	14.2
BBCH 50-52	2020	RGT Planet	Zn	294	4.86	0.57	14.42
BBCH 50-52	2020	RGT Planet	Zn	287	4.25	0.56	14.11
BBCH 50-52	2020	RGT Planet	Zn	288	4.46	0.56	14.82
BBCH 50-52	2020	RGT Planet	Zn	293	3.79	0.53	14.76
BBCH 50-52	2021	Baryłka	control	290	4.4	0.6	14.2
BBCH 50-52	2021	Baryłka	control	289	3.9	0.58	14.4
BBCH 50-52	2021	Baryłka	control	292	3.98	0.52	13.8
BBCH 50-52	2021	Baryłka	control	285	4.11	0.55	14.2
BBCH 50-52	2021	Baryłka	control	295	4.42	0.54	13.28
BBCH 50-52	2021	Baryłka	control	297	4.15	0.6	13.52
BBCH 50-52	2021	Baryłka	control	294	4.36	0.59	13.42
BBCH 50-52	2021	Baryłka	control	295	4.52	0.59	13.5
BBCH 50-52	2021	Baryłka	control	298	4.3	0.58	14
BBCH 50-52	2021	Baryłka	control	295	4.32	0.52	14.1
BBCH 50-52	2021	Baryłka	control	288	4.29	0.65	13.7
BBCH 50-52	2021	Baryłka	control	291	4.23	0.55	13.32
BBCH 50-52	2021	Baryłka	Cu	305	4.52	0.65	15.5
BBCH 50-52	2021	Baryłka	Cu	302	4.6	0.64	15.25
BBCH 50-52	2021	Baryłka	Cu	300	4.8	0.6	15.3
BBCH 50-52	2021	Baryłka	Cu	299	4.74	0.61	15.1
BBCH 50-52	2021	Baryłka	Cu	302	4.82	0.62	15.84
BBCH 50-52	2021	Baryłka	Cu	300	5.02	0.63	16.02
BBCH 50-52	2021	Baryłka	Cu	302	4.92	0.625	15.98
BBCH 50-52	2021	Baryłka	Cu	300	4.66	0.63	15.8
BBCH 50-52	2021	Baryłka	Cu	310	4.88	0.61	15.24
BBCH 50-52	2021	Baryłka	Cu	297	4.01	0.71	16.46
BBCH 50-52	2021	Baryłka	Cu	307	4.45	0.63	15.19
BBCH 50-52	2021	Baryłka	Cu	292	5.66	0.55	15.48
BBCH 50-52	2021	Baryłka	Mn	305	5.12	0.66	14.22
BBCH 50-52	2021	Baryłka	Mn	306	5.25	0.52	14.02
BBCH 50-52	2021	Baryłka	Mn	310	5.62	0.55	13.92
BBCH 50-52	2021	Baryłka	Mn	309	5.51	0.58	13.9
BBCH 50-52	2021	Baryłka	Mn	305	5.6	0.61	13.84
BBCH 50-52	2021	Baryłka	Mn	303	5.44	0.6	13.55
BBCH 50-52	2021	Baryłka	Mn	300	5.39	0.62	14.2
BBCH 50-52	2021	Baryłka	Mn	304	5.48	0.59	14
BBCH 50-52	2021	Baryłka	Mn	300	5.22	0.69	13.77
BBCH 50-52	2021	Baryłka	Mn	305	5.77	0.67	13.89
BBCH 50-52	2021	Baryłka	Mn	323	4.99	0.37	13.9
BBCH 50-52	2021	Baryłka	Mn	295	5.65	0.63	14.31
BBCH 50-52	2021	Baryłka	Mo	298	4.72	0.5	14.41
BBCH 50-52	2021	Baryłka	Mo	297	4.6	0.55	14.2
BBCH 50-52	2021	Baryłka	Mo	295	4.55	0.58	14.64
BBCH 50-52	2021	Baryłka	Mo	301	4.68	0.52	14.12
BBCH 50-52	2021	Baryłka	Mo	303	4.7	0.56	14.2
BBCH 50-52	2021	Baryłka	Mo	305	4.55	0.54	14.14
BBCH 50-52	2021	Baryłka	Mo	308	4.8	0.54	14.56
BBCH 50-52	2021	Baryłka	Mo	299	4.65	0.55	14.82
BBCH 50-52	2021	Baryłka	Mo	314	5.01	0.48	15.61
BBCH 50-52	2021	Baryłka	Mo	302	4.02	0.54	13.42
BBCH 50-52	2021	Baryłka	Mo	296	4.25	0.56	14.26
BBCH 50-52	2021	Baryłka	Mo	288	5.32	0.6	14.25
BBCH 50-52	2021	Baryłka	Zn	300	5.44	0.71	15.5
BBCH 50-52	2021	Baryłka	Zn	301	5.5	0.7	15.35
BBCH 50-52	2021	Baryłka	Zn	302	4.92	0.62	16.02
BBCH 50-52	2021	Baryłka	Zn	305	5.3	0.66	16
BBCH 50-52	2021	Baryłka	Zn	308	5.02	0.64	15.24
BBCH 50-52	2021	Baryłka	Zn	299	5.35	0.7	14.56
BBCH 50-52	2021	Baryłka	Zn	302	5.52	0.62	14.99
BBCH 50-52	2021	Baryłka	Zn	300	5.75	0.6	15.98
BBCH 50-52	2021	Baryłka	Zn	295	5.44	0.71	16.38
BBCH 50-52	2021	Baryłka	Zn	292	4.87	0.57	15.84
BBCH 50-52	2021	Baryłka	Zn	307	5	0.68	14.44
BBCH 50-52	2021	Baryłka	Zn	315	6.12	0.62	15.13
BBCH 50-52	2021	KWS Irina	control	284	5.5	0.55	13.82
BBCH 50-52	2021	KWS Irina	control	285	5.11	0.56	13.22
BBCH 50-52	2021	KWS Irina	control	299	5.02	0.61	12.85
BBCH 50-52	2021	KWS Irina	control	301	4.98	0.57	12.77
BBCH 50-52	2021	KWS Irina	control	302	4.92	0.55	12.85
BBCH 50-52	2021	KWS Irina	control	304	5.2	0.58	13.4
BBCH 50-52	2021	KWS Irina	control	306	5.35	0.58	13.25
BBCH 50-52	2021	KWS Irina	control	302	5.45	0.56	13.5
BBCH 50-52	2021	KWS Irina	control	300	5.36	0.54	14.82
BBCH 50-52	2021	KWS Irina	control	288	5.14	0.56	13.35
BBCH 50-52	2021	KWS Irina	control	299	5.22	0.54	12.42
BBCH 50-52	2021	KWS Irina	control	306	5.01	0.64	12.22
BBCH 50-52	2021	KWS Irina	Cu	320	5.45	0.62	13.4
BBCH 50-52	2021	KWS Irina	Cu	322	5.32	0.6	13.88
BBCH 50-52	2021	KWS Irina	Cu	313	5.38	0.54	13.57
BBCH 50-52	2021	KWS Irina	Cu	318	5.4	0.55	13.25
BBCH 50-52	2021	KWS Irina	Cu	323	5.36	0.52	12.81
BBCH 50-52	2021	KWS Irina	Cu	325	5.32	0.56	13.05
BBCH 50-52	2021	KWS Irina	Cu	328	5.37	0.58	13.14
BBCH 50-52	2021	KWS Irina	Cu	321	5.38	0.55	13.65
BBCH 50-52	2021	KWS Irina	Cu	318	4.98	0.73	12.84
BBCH 50-52	2021	KWS Irina	Cu	315	5.22	0.59	13.33
BBCH 50-52	2021	KWS Irina	Cu	331	5.87	0.49	13.59
BBCH 50-52	2021	KWS Irina	Cu	323	5.44	0.45	13.63
BBCH 50-52	2021	KWS Irina	Mn	299	6.02	0.52	15.4
BBCH 50-52	2021	KWS Irina	Mn	302	5.92	0.54	15.12
BBCH 50-52	2021	KWS Irina	Mn	285	5.81	0.56	15.35
BBCH 50-52	2021	KWS Irina	Mn	299	5.75	0.58	15.45
BBCH 50-52	2021	KWS Irina	Mn	305	5.72	0.6	15.6
BBCH 50-52	2021	KWS Irina	Mn	311	5.91	0.62	15.23
BBCH 50-52	2021	KWS Irina	Mn	322	5.75	0.54	15.52
BBCH 50-52	2021	KWS Irina	Mn	320	6.02	0.5	15.4
BBCH 50-52	2021	KWS Irina	Mn	290	5.92	0.55	15.33
BBCH 50-52	2021	KWS Irina	Mn	302	5.77	0.49	15.34
BBCH 50-52	2021	KWS Irina	Mn	307	5.9	0.65	15.02
BBCH 50-52	2021	KWS Irina	Mn	323	5.88	0.54	15.84
BBCH 50-52	2021	KWS Irina	Mo	315	5.87	0.58	14.98
BBCH 50-52	2021	KWS Irina	Mo	318	5.9	0.56	14.7
BBCH 50-52	2021	KWS Irina	Mo	319	6.12	0.58	15.35
BBCH 50-52	2021	KWS Irina	Mo	309	6.13	0.54	15.2
BBCH 50-52	2021	KWS Irina	Mo	308	5.98	0.58	15.67
BBCH 50-52	2021	KWS Irina	Mo	315	5.79	0.57	16.02
BBCH 50-52	2021	KWS Irina	Mo	310	6.02	0.52	15.2
BBCH 50-52	2021	KWS Irina	Mo	317	6.18	0.56	15.1
BBCH 50-52	2021	KWS Irina	Mo	316	5.77	0.55	15.14
BBCH 50-52	2021	KWS Irina	Mo	302	5.98	0.58	14.87
BBCH 50-52	2021	KWS Irina	Mo	318	6.01	0.55	14.85
BBCH 50-52	2021	KWS Irina	Mo	320	6.22	0.56	16.28
BBCH 50-52	2021	KWS Irina	Zn	303	5.9	0.58	15.8
BBCH 50-52	2021	KWS Irina	Zn	313	6.13	0.61	15.44
BBCH 50-52	2021	KWS Irina	Zn	320	6.05	0.64	15.95
BBCH 50-52	2021	KWS Irina	Zn	308	5.82	0.62	16.24
BBCH 50-52	2021	KWS Irina	Zn	301	5.75	0.57	16.16
BBCH 50-52	2021	KWS Irina	Zn	307	5.9	0.54	16.08
BBCH 50-52	2021	KWS Irina	Zn	302	5.66	0.59	15.77
BBCH 50-52	2021	KWS Irina	Zn	310	5.89	0.65	15.52
BBCH 50-52	2021	KWS Irina	Zn	300	6.02	0.62	16.75
BBCH 50-52	2021	KWS Irina	Zn	295	5.88	0.62	15.73
BBCH 50-52	2021	KWS Irina	Zn	317	5.77	0.48	15.61
BBCH 50-52	2021	KWS Irina	Zn	321	5.87	0.69	15.36
BBCH 50-52	2021	RGT Planet	control	295	5.42	0.58	16.02
BBCH 50-52	2021	RGT Planet	control	298	5.44	0.57	16.57
BBCH 50-52	2021	RGT Planet	control	300	5.64	0.62	17.55
BBCH 50-52	2021	RGT Planet	control	287	5.12	0.64	16.89
BBCH 50-52	2021	RGT Planet	control	288	5.33	0.68	17.05
BBCH 50-52	2021	RGT Planet	control	295	5.08	0.57	17.08
BBCH 50-52	2021	RGT Planet	control	297	5.01	0.56	17.44
BBCH 50-52	2021	RGT Planet	control	295	5.12	0.61	17.52
BBCH 50-52	2021	RGT Planet	control	298	5.22	0.55	16.25
BBCH 50-52	2021	RGT Planet	control	300	5.56	0.54	17.82
BBCH 50-52	2021	RGT Planet	control	295	5.21	0.65	16.34
BBCH 50-52	2021	RGT Planet	control	286	5.11	0.68	17.64
BBCH 50-52	2021	RGT Planet	Cu	310	5.32	0.52	18.8
BBCH 50-52	2021	RGT Planet	Cu	323	5.14	0.55	19.1
BBCH 50-52	2021	RGT Planet	Cu	322	5.22	0.61	18.99
BBCH 50-52	2021	RGT Planet	Cu	315	5.35	0.63	18.63
BBCH 50-52	2021	RGT Planet	Cu	319	4.87	0.67	18.77
BBCH 50-52	2021	RGT Planet	Cu	305	4.9	0.59	19.1
BBCH 50-52	2021	RGT Planet	Cu	303	5.23	0.64	18.67
BBCH 50-52	2021	RGT Planet	Cu	301	5.44	0.61	18.8
BBCH 50-52	2021	RGT Planet	Cu	331	5.13	0.7	17.52
BBCH 50-52	2021	RGT Planet	Cu	310	4.88	0.63	19.29
BBCH 50-52	2021	RGT Planet	Cu	303	5.44	0.65	18.85
BBCH 50-52	2021	RGT Planet	Cu	307	5.27	0.42	19.92
BBCH 50-52	2021	RGT Planet	Mn	315	5.3	0.52	17.33
BBCH 50-52	2021	RGT Planet	Mn	310	5.28	0.56	16.99
BBCH 50-52	2021	RGT Planet	Mn	312	4.99	0.57	17.05
BBCH 50-52	2021	RGT Planet	Mn	308	5.36	0.62	17.45
BBCH 50-52	2021	RGT Planet	Mn	305	5.8	0.64	17.55
BBCH 50-52	2021	RGT Planet	Mn	308	5.34	0.6	18.01
BBCH 50-52	2021	RGT Planet	Mn	306	5.13	0.58	17.88
BBCH 50-52	2021	RGT Planet	Mn	308	5.1	0.32	16.97
BBCH 50-52	2021	RGT Planet	Mn	314	5.09	0.46	17.48
BBCH 50-52	2021	RGT Planet	Mn	304	4.95	0.47	16.85
BBCH 50-52	2021	RGT Planet	Mn	320	5.52	0.67	17.28
BBCH 50-52	2021	RGT Planet	Mn	301	5.57	0.62	18.05
BBCH 50-52	2021	RGT Planet	Mo	302	5.12	0.51	16.25
BBCH 50-52	2021	RGT Planet	Mo	299	5.25	0.5	16.82
BBCH 50-52	2021	RGT Planet	Mo	300	5.2	0.48	16.77
BBCH 50-52	2021	RGT Planet	Mo	295	5.12	0.44	16.52
BBCH 50-52	2021	RGT Planet	Mo	299	5.08	0.52	16.87
BBCH 50-52	2021	RGT Planet	Mo	300	5.03	0.51	17.12
BBCH 50-52	2021	RGT Planet	Mo	299	5.1	0.52	17.07
BBCH 50-52	2021	RGT Planet	Mo	298	5.08	0.5	16.78
BBCH 50-52	2021	RGT Planet	Mo	307	5.15	0.65	16.21
BBCH 50-52	2021	RGT Planet	Mo	297	5.08	0.58	16.63
BBCH 50-52	2021	RGT Planet	Mo	292	5.19	0.33	16.94
BBCH 50-52	2021	RGT Planet	Mo	299	5.09	0.43	17.28
BBCH 50-52	2021	RGT Planet	Zn	302	4.55	0.48	16.74
BBCH 50-52	2021	RGT Planet	Zn	300	4.87	0.5	17.23
BBCH 50-52	2021	RGT Planet	Zn	298	5.12	0.51	16.98
BBCH 50-52	2021	RGT Planet	Zn	298	5.35	0.47	16.57
BBCH 50-52	2021	RGT Planet	Zn	297	5.37	0.48	17.12
BBCH 50-52	2021	RGT Planet	Zn	299	5.65	0.51	17.45
BBCH 50-52	2021	RGT Planet	Zn	302	5.14	0.47	16.54
BBCH 50-52	2021	RGT Planet	Zn	299	4.75	0.49	16.73
BBCH 50-52	2021	RGT Planet	Zn	304	4.25	0.47	16.46
BBCH 50-52	2021	RGT Planet	Zn	305	6.04	0.35	17.53
BBCH 50-52	2021	RGT Planet	Zn	295	4.85	0.64	16.73
BBCH 50-52	2021	RGT Planet	Zn	294	5.21	0.49	17.02

## Sheet: chlorophyll fluorescence
Date	Year	Cultivar	Fertilization	Fv/Fm	RC / ABS	Fv / Fo	(1-Vj) / Vj	PI
BBCH 43-45	2019	Baryłka	control	0.82455	2.532	4.956	0.6325	9.256
BBCH 43-45	2019	Baryłka	control	0.7935	2.7	4.02	0.667	9.425
BBCH 43-45	2019	Baryłka	control	0.79235	2.532	4.104	0.713	9.8046
BBCH 43-45	2019	Baryłka	control	0.82225	2.64	4.38	0.6762	9.6772
BBCH 43-45	2019	Baryłka	control	0.8004	2.544	4.62	0.66355	9.2625
BBCH 43-45	2019	Baryłka	control	0.80385	2.424	4.392	0.75325	9.0974
BBCH 43-45	2019	Baryłka	control	0.79235	2.82	4.776	0.713	8.931
BBCH 43-45	2019	Baryłka	control	0.80385	2.88	5.04	0.7475	8.671
BBCH 43-45	2019	Baryłka	control	0.7843	3.996	5.052	0.71875	8.7685
BBCH 43-45	2019	Baryłka	control	0.7774	2.7	4.536	0.7084	9.243
BBCH 43-45	2019	Baryłka	control	0.80385	3.1872	4.776	0.6762	8.2173
BBCH 43-45	2019	Baryłka	control	0.80615	3.048	5.22	0.6647	8.3343
BBCH 43-45	2019	Baryłka	control	0.8073	2.94	4.968	0.64055	8.1276
BBCH 43-45	2019	Baryłka	control	0.80615	2.76	5.076	0.67275	7.9443
BBCH 43-45	2019	Baryłka	control	0.8211	2.58	4.944	0.67735	8.099
BBCH 43-45	2019	Baryłka	control	0.8165	2.628	4.932	0.6808	8.2355
BBCH 43-45	2019	Baryłka	control	0.8073	2.652	4.788	0.7153	8.3902
BBCH 43-45	2019	Baryłka	control	0.8188	2.64	4.548	0.7038	8.2589
BBCH 43-45	2019	Baryłka	control	0.8211	2.616	4.14	0.70495	8.5605
BBCH 43-45	2019	Baryłka	control	0.8165	2.34	4.272	0.71185	8.6658
BBCH 43-45	2019	Baryłka	Cu	0.87055	2.544	4.59	0.71645	9.3002
BBCH 43-45	2019	Baryłka	Cu	0.8533	2.268	4.83	0.72795	9.399
BBCH 43-45	2019	Baryłka	Cu	0.83375	2.784	4.932	0.7061	10.543
BBCH 43-45	2019	Baryłka	Cu	0.8809	2.532	4.662	0.70725	9.0467
BBCH 43-45	2019	Baryłka	Cu	0.90275	2.79	5.076	0.6992	8.853
BBCH 43-45	2019	Baryłka	Cu	0.9108	2.5464	4.9692	0.7176	9.425
BBCH 43-45	2019	Baryłka	Cu	0.9085	2.8224	5.1984	0.7797	11.2333
BBCH 43-45	2019	Baryłka	Cu	0.92345	3.054	5.1024	0.7544	11.0773
BBCH 43-45	2019	Baryłka	Cu	0.9292	2.8092	4.7868	0.7843	10.582
BBCH 43-45	2019	Baryłka	Cu	0.9315	2.7876	4.788	0.75325	8.5111
BBCH 43-45	2019	Baryłka	Cu	0.91885	2.88	4.5336	0.7383	8.9076
BBCH 43-45	2019	Baryłka	Cu	0.92	2.8224	4.9452	0.7314	9.633
BBCH 43-45	2019	Baryłka	Cu	0.90505	2.5584	5.184	0.7061	9.4003
BBCH 43-45	2019	Baryłka	Cu	0.90965	2.91	5.58	0.7153	9.36
BBCH 43-45	2019	Baryłka	Cu	0.91885	2.7972	4.6452	0.7107	9.2846
BBCH 43-45	2019	Baryłka	Cu	0.9223	3.024	5.1468	0.7038	9.0857
BBCH 43-45	2019	Baryłka	Cu	0.92115	2.9532	5.1612	0.7406	8.814
BBCH 43-45	2019	Baryłka	Cu	0.93265	2.8236	5.064	0.7107	8.8673
BBCH 43-45	2019	Baryłka	Cu	0.9085	2.67	4.932	0.7199	9.282
BBCH 43-45	2019	Baryłka	Cu	0.9062	3.186	4.7784	0.7245	9.9554
BBCH 43-45	2019	Baryłka	Mn	0.9292	3.732	5.0184	0.7544	9.2846
BBCH 43-45	2019	Baryłka	Mn	0.9223	3.324	3.9024	0.7843	9.0896
BBCH 43-45	2019	Baryłka	Mn	0.90505	2.8944	4.0344	0.77855	9.3925
BBCH 43-45	2019	Baryłka	Mn	0.80385	3.39	4.908	0.71875	9.5199
BBCH 43-45	2019	Baryłka	Mn	0.9177	4.4928	4.9344	0.7061	9.5303
BBCH 43-45	2019	Baryłka	Mn	0.81535	4.4268	4.2696	0.72795	8.8205
BBCH 43-45	2019	Baryłka	Mn	0.9223	4.3932	4.3872	0.7061	8.6554
BBCH 43-45	2019	Baryłka	Mn	0.93495	3.4536	4.392	0.71875	9.4354
BBCH 43-45	2019	Baryłka	Mn	0.86135	3.192	3.852	0.7544	9.8033
BBCH 43-45	2019	Baryłka	Mn	0.90505	3.246	5.064	0.77625	9.9606
BBCH 43-45	2019	Baryłka	Mn	0.9108	3.372	5.454	0.7912	10.3883
BBCH 43-45	2019	Baryłka	Mn	0.8556	3.3288	5.5344	0.6877	10.5612
BBCH 43-45	2019	Baryłka	Mn	0.90505	3.2232	5.3304	0.69575	10.3896
BBCH 43-45	2019	Baryłka	Mn	0.9361	3.1956	5.0244	0.73715	11.2216
BBCH 43-45	2019	Baryłka	Mn	0.93035	2.9304	5.1984	0.72795	10.7276
BBCH 43-45	2019	Baryłka	Mn	0.9315	3.7404	5.43	0.73715	10.582
BBCH 43-45	2019	Baryłka	Mn	0.8809	3.1584	5.52	0.7544	10.6912
BBCH 43-45	2019	Baryłka	Mn	0.8648	3.0648	5.5044	0.69345	10.8303
BBCH 43-45	2019	Baryłka	Mn	0.8556	3.4176	4.6668	0.70495	10.9083
BBCH 43-45	2019	Baryłka	Mn	0.9223	3.666	5.3304	0.6923	10.9226
BBCH 43-45	2019	Baryłka	Mo	0.9338	3.876	5.1984	0.7153	9.2846
BBCH 43-45	2019	Baryłka	Mo	0.9108	3.9972	5.0532	0.7061	9.295
BBCH 43-45	2019	Baryłka	Mo	0.9108	4.1496	5.4132	0.73025	9.724
BBCH 43-45	2019	Baryłka	Mo	0.91885	4.6224	5.2392	0.7406	10.556
BBCH 43-45	2019	Baryłka	Mo	0.94415	4.2612	5.13	0.78775	10.8719
BBCH 43-45	2019	Baryłka	Mo	0.92575	3.5928	4.932	0.7636	11.1111
BBCH 43-45	2019	Baryłka	Mo	0.9361	3.4644	5.4492	0.71645	11.2593
BBCH 43-45	2019	Baryłka	Mo	0.95795	3.33	4.5336	0.7153	10.3974
BBCH 43-45	2019	Baryłka	Mo	0.94415	3.5904	4.7148	0.72565	11.2645
BBCH 43-45	2019	Baryłka	Mo	0.9361	3.7368	5.1972	0.7406	11.5843
BBCH 43-45	2019	Baryłka	Mo	0.9223	3.8424	5.1456	0.71875	11.3672
BBCH 43-45	2019	Baryłka	Mo	0.92	3.456	5.5368	0.72795	11.1202
BBCH 43-45	2019	Baryłka	Mo	0.8855	3.1728	5.3292	0.70265	10.673
BBCH 43-45	2019	Baryłka	Mo	0.9108	2.9688	5.106	0.76475	10.868
BBCH 43-45	2019	Baryłka	Mo	0.92115	3.3288	4.6584	0.71875	10.9811
BBCH 43-45	2019	Baryłka	Mo	0.93495	3.0696	4.0944	0.7107	11.232
BBCH 43-45	2019	Baryłka	Mo	0.92345	3.1452	5.5836	0.72565	10.6444
BBCH 43-45	2019	Baryłka	Mo	0.9453	3.2568	5.5968	0.71875	10.2505
BBCH 43-45	2019	Baryłka	Mo	0.94185	3.8532	5.142	0.72795	9.9528
BBCH 43-45	2019	Baryłka	Mo	0.9407	4.284	5.16	0.7061	9.2885
BBCH 43-45	2019	Baryłka	Zn	0.9315	3.294	5.346	0.7636	9.4185
BBCH 43-45	2019	Baryłka	Zn	0.94875	3.42	4.9488	0.71875	10.1062
BBCH 43-45	2019	Baryłka	Zn	0.93495	3.1944	5.19	0.7314	8.9414
BBCH 43-45	2019	Baryłka	Zn	0.9062	2.6568	5.334	0.7061	8.6528
BBCH 43-45	2019	Baryłka	Zn	0.94415	2.8728	5.2272	0.81765	9.2482
BBCH 43-45	2019	Baryłka	Zn	0.95795	3.732	5.1024	0.82915	9.8085
BBCH 43-45	2019	Baryłka	Zn	0.943	3.8652	5.5932	0.782	9.9931
BBCH 43-45	2019	Baryłka	Zn	0.9361	3.6624	5.2224	0.73025	10.1205
BBCH 43-45	2019	Baryłka	Zn	0.9177	3.3288	4.932	0.7061	10.5482
BBCH 43-45	2019	Baryłka	Zn	0.9223	3.1728	5.1024	0.71875	10.4325
BBCH 43-45	2019	Baryłka	Zn	0.93035	2.9448	5.19	0.72795	10.3805
BBCH 43-45	2019	Baryłka	Zn	0.9361	3.096	5.0736	0.70725	10.3844
BBCH 43-45	2019	Baryłka	Zn	0.93955	3.1956	5.0292	0.7774	10.8199
BBCH 43-45	2019	Baryłka	Zn	0.94875	3.3168	5.1768	0.75325	10.9382
BBCH 43-45	2019	Baryłka	Zn	0.92345	3.0132	5.3292	0.78315	9.3782
BBCH 43-45	2019	Baryłka	Zn	0.90505	3.7452	4.9704	0.77855	9.5303
BBCH 43-45	2019	Baryłka	Zn	0.9154	3.9984	4.6644	0.7751	9.6733
BBCH 43-45	2019	Baryłka	Zn	0.92575	3.7704	4.6968	0.7153	9.8046
BBCH 43-45	2019	Baryłka	Zn	0.93495	3.696	4.6548	0.7061	9.8293
BBCH 43-45	2019	Baryłka	Zn	0.9223	3.9216	4.932	0.7084	10.2453
BBCH 43-45	2019	KWS Irina	control	0.90505	3.0492	5.0568	0.6923	10.1075
BBCH 43-45	2019	KWS Irina	control	0.89355	2.79	4.9692	0.7061	10.1985
BBCH 43-45	2019	KWS Irina	control	0.90275	3.3288	4.8252	0.7153	9.6876
BBCH 43-45	2019	KWS Irina	control	0.87975	3.2904	4.6644	0.7084	9.6733
BBCH 43-45	2019	KWS Irina	control	0.8809	3.222	5.226	0.71875	9.2885
BBCH 43-45	2019	KWS Irina	control	0.90505	3.3336	5.2032	0.7176	9.5355
BBCH 43-45	2019	KWS Irina	control	0.8004	3.186	5.1048	0.7107	9.425
BBCH 43-45	2019	KWS Irina	control	0.7797	2.6652	5.3364	0.71875	9.8202
BBCH 43-45	2019	KWS Irina	control	0.76705	2.3496	5.454	0.7084	9.0883
BBCH 43-45	2019	KWS Irina	control	0.79235	2.532	4.998	0.73025	9.243
BBCH 43-45	2019	KWS Irina	control	0.7889	2.382	4.9764	0.76705	8.9466
BBCH 43-45	2019	KWS Irina	control	0.81765	2.2608	5.046	0.6877	7.9703
BBCH 43-45	2019	KWS Irina	control	0.81075	2.7852	4.9908	0.71875	8.0925
BBCH 43-45	2019	KWS Irina	control	0.8096	2.5692	5.1096	0.6923	8.0782
BBCH 43-45	2019	KWS Irina	control	0.8004	2.838	4.5444	0.7107	8.2303
BBCH 43-45	2019	KWS Irina	control	0.81765	2.7768	4.7856	0.71645	8.3733
BBCH 43-45	2019	KWS Irina	control	0.8004	2.424	4.5336	0.71185	8.3473
BBCH 43-45	2019	KWS Irina	control	0.81765	2.7768	5.1984	0.7153	8.2433
BBCH 43-45	2019	KWS Irina	control	0.77855	2.7048	5.1024	0.713	8.2407
BBCH 43-45	2019	KWS Irina	control	0.782	2.6652	4.5336	0.7061	8.905
BBCH 43-45	2019	KWS Irina	Cu	0.8901	2.928	4.9368	0.80615	9.2391
BBCH 43-45	2019	KWS Irina	Cu	0.90735	2.58	5.0544	0.8004	9.3925
BBCH 43-45	2019	KWS Irina	Cu	0.851	2.8212	5.1972	0.78775	8.3811
BBCH 43-45	2019	KWS Irina	Cu	0.83375	2.9292	5.2356	0.77855	8.4825
BBCH 43-45	2019	KWS Irina	Cu	0.8211	3.1428	5.4624	0.8004	8.2342
BBCH 43-45	2019	KWS Irina	Cu	0.80385	2.25	5.0736	0.805	8.827
BBCH 43-45	2019	KWS Irina	Cu	0.8211	1.998	5.0304	0.8165	9.464
BBCH 43-45	2019	KWS Irina	Cu	0.83145	2.6736	5.2164	0.72795	9.5303
BBCH 43-45	2019	KWS Irina	Cu	0.79465	2.7768	4.9728	0.7636	9.6902
BBCH 43-45	2019	KWS Irina	Cu	0.81765	2.97	5.07	0.7498	9.5368
BBCH 43-45	2019	KWS Irina	Cu	0.828	3.1968	5.4168	0.7176	9.4354
BBCH 43-45	2019	KWS Irina	Cu	0.8004	3.4584	4.7976	0.72795	9.5043
BBCH 43-45	2019	KWS Irina	Cu	0.81765	3.0168	4.5048	0.74405	9.1416
BBCH 43-45	2019	KWS Irina	Cu	0.84065	3.1632	4.932	0.7153	9.282
BBCH 43-45	2019	KWS Irina	Cu	0.8211	2.9292	5.4672	0.6762	9.8202
BBCH 43-45	2019	KWS Irina	Cu	0.8303	3.0024	4.062	0.67965	8.8062
BBCH 43-45	2019	KWS Irina	Cu	0.81765	3.1956	5.1024	0.6923	8.9674
BBCH 43-45	2019	KWS Irina	Cu	0.82915	2.8284	4.944	0.71415	9.0896
BBCH 43-45	2019	KWS Irina	Cu	0.8257	2.826	5.1984	0.6969	9.126
BBCH 43-45	2019	KWS Irina	Cu	0.80385	2.898	5.142	0.67505	7.982
BBCH 43-45	2019	KWS Irina	Mn	0.8556	2.5704	5.3292	0.69345	9.373
BBCH 43-45	2019	KWS Irina	Mn	0.81765	2.7984	4.9692	0.68885	9.5316
BBCH 43-45	2019	KWS Irina	Mn	0.8372	3.1452	5.0676	0.67275	9.4276
BBCH 43-45	2019	KWS Irina	Mn	0.8211	2.928	5.0628	0.66585	9.2885
BBCH 43-45	2019	KWS Irina	Mn	0.8303	3.0984	5.142	0.6785	9.5186
BBCH 43-45	2019	KWS Irina	Mn	0.84065	3.084	4.5288	0.7153	9.2885
BBCH 43-45	2019	KWS Irina	Mn	0.7958	3.1452	4.6776	0.7245	9.6785
BBCH 43-45	2019	KWS Irina	Mn	0.79005	3.1596	4.6824	0.6969	9.3223
BBCH 43-45	2019	KWS Irina	Mn	0.81765	2.9688	5.1024	0.69575	9.4276
BBCH 43-45	2019	KWS Irina	Mn	0.83835	3.09	5.0676	0.7061	9.5316
BBCH 43-45	2019	KWS Irina	Mn	0.8464	3.1944	5.166	0.70495	9.321
BBCH 43-45	2019	KWS Irina	Mn	0.851	3.2568	5.1972	0.7153	9.4029
BBCH 43-45	2019	KWS Irina	Mn	0.89125	3.3744	4.86	0.7061	9.438
BBCH 43-45	2019	KWS Irina	Mn	0.8763	2.6676	5.028	0.7705	9.5654
BBCH 43-45	2019	KWS Irina	Mn	0.7682	2.58	5.1024	0.8073	9.6837
BBCH 43-45	2019	KWS Irina	Mn	0.9085	2.718	5.1144	0.80615	9.048
BBCH 43-45	2019	KWS Irina	Mn	0.8947	2.6568	5.16	0.8004	9.633
BBCH 43-45	2019	KWS Irina	Mn	0.87975	2.568	4.4028	0.7912	9.3067
BBCH 43-45	2019	KWS Irina	Mn	0.85215	2.424	4.74	0.78085	9.6772
BBCH 43-45	2019	KWS Irina	Mn	0.83835	2.388	4.7976	0.80385	9.5225
BBCH 43-45	2019	KWS Irina	Mo	0.8947	2.7984	5.0544	0.7613	10.7276
BBCH 43-45	2019	KWS Irina	Mo	0.91655	2.8968	4.9824	0.7544	10.5482
BBCH 43-45	2019	KWS Irina	Mo	0.85675	3.06	5.19	0.74175	9.9684
BBCH 43-45	2019	KWS Irina	Mo	0.8901	3.1368	5.4648	0.76015	9.6785
BBCH 43-45	2019	KWS Irina	Mo	0.8303	2.9292	5.6544	0.7314	10.543
BBCH 43-45	2019	KWS Irina	Mo	0.9062	2.784	5.598	0.71415	10.7003
BBCH 43-45	2019	KWS Irina	Mo	0.8809	2.6688	5.8104	0.71875	10.2557
BBCH 43-45	2019	KWS Irina	Mo	0.90505	2.796	5.3292	0.7084	10.8316
BBCH 43-45	2019	KWS Irina	Mo	0.8855	3.054	5.4168	0.7176	10.66
BBCH 43-45	2019	KWS Irina	Mo	0.91885	3.0132	5.55	0.713	10.3896
BBCH 43-45	2019	KWS Irina	Mo	0.8211	3.1932	5.4612	0.7314	9.8228
BBCH 43-45	2019	KWS Irina	Mo	0.8004	3.1968	5.1984	0.7084	9.243
BBCH 43-45	2019	KWS Irina	Mo	0.81765	3.24	5.4624	0.7176	10.5612
BBCH 43-45	2019	KWS Irina	Mo	0.84295	2.8716	5.238	0.7061	10.686
BBCH 43-45	2019	KWS Irina	Mo	0.83375	2.8536	5.334	0.72795	9.321
BBCH 43-45	2019	KWS Irina	Mo	0.8556	3.0732	5.4624	0.73715	9.3873
BBCH 43-45	2019	KWS Irina	Mo	0.8073	2.9304	5.55	0.70265	9.5199
BBCH 43-45	2019	KWS Irina	Mo	0.8556	2.874	5.118	0.72795	9.6785
BBCH 43-45	2019	KWS Irina	Mo	0.81765	2.9292	5.3292	0.7061	9.9528
BBCH 43-45	2019	KWS Irina	Mo	0.83375	3.0264	4.9704	0.6969	10.01
BBCH 43-45	2019	KWS Irina	Zn	0.9177	3.066	5.3292	0.7153	10.2414
BBCH 43-45	2019	KWS Irina	Zn	0.9223	3.1872	5.1876	0.7245	10.5482
BBCH 43-45	2019	KWS Irina	Zn	0.92115	2.934	5.0652	0.7406	10.8719
BBCH 43-45	2019	KWS Irina	Zn	0.90735	3.42	5.1	0.71875	10.92
BBCH 43-45	2019	KWS Irina	Zn	0.91885	2.7732	5.2032	0.77855	11.843
BBCH 43-45	2019	KWS Irina	Zn	0.8556	2.91	5.4612	0.7958	9.9632
BBCH 43-45	2019	KWS Irina	Zn	0.91425	2.7972	5.1876	0.77855	10.3428
BBCH 43-45	2019	KWS Irina	Zn	0.90275	3.3288	5.2032	0.76935	10.9785
BBCH 43-45	2019	KWS Irina	Zn	0.87975	3.1956	4.9368	0.7544	10.8316
BBCH 43-45	2019	KWS Irina	Zn	0.89125	2.898	5.0652	0.7199	9.2833
BBCH 43-45	2019	KWS Irina	Zn	0.90275	2.6736	5.16	0.59685	10.3376
BBCH 43-45	2019	KWS Irina	Zn	0.91885	3.4644	5.1984	0.6095	10.0815
BBCH 43-45	2019	KWS Irina	Zn	0.8809	2.9592	5.064	0.7751	10.6756
BBCH 43-45	2019	KWS Irina	Zn	0.92345	3.294	4.6668	0.7314	10.5963
BBCH 43-45	2019	KWS Irina	Zn	0.92575	3.3252	4.4364	0.68425	10.3935
BBCH 43-45	2019	KWS Irina	Zn	0.91885	2.9388	4.6968	0.6601	10.2674
BBCH 43-45	2019	KWS Irina	Zn	0.8901	2.244	3.8784	0.6762	10.3428
BBCH 43-45	2019	KWS Irina	Zn	0.9108	2.6652	5.0568	0.67965	10.7016
BBCH 43-45	2019	KWS Irina	Zn	0.79465	2.5632	5.2068	0.76015	10.8186
BBCH 43-45	2019	KWS Irina	Zn	0.76475	2.7972	4.9704	0.70495	10.5885
BBCH 43-45	2019	RGT Planet	control	0.8211	2.76	5.3292	0.76015	9.282
BBCH 43-45	2019	RGT Planet	control	0.9062	2.6652	4.9812	0.6348	9.3925
BBCH 43-45	2019	RGT Planet	control	0.8188	2.634	5.184	0.62675	9.5199
BBCH 43-45	2019	RGT Planet	control	0.83375	2.574	5.4624	0.7153	9.6902
BBCH 43-45	2019	RGT Planet	control	0.8418	2.796	5.328	0.7291	9.2833
BBCH 43-45	2019	RGT Planet	control	0.9223	3.0612	5.2344	0.75325	9.893
BBCH 43-45	2019	RGT Planet	control	0.92575	2.6736	4.9692	0.7774	9.4276
BBCH 43-45	2019	RGT Planet	control	0.8809	2.7624	5.592	0.7843	9.0961
BBCH 43-45	2019	RGT Planet	control	0.85675	3.0648	4.9812	0.7406	8.762
BBCH 43-45	2019	RGT Planet	control	0.81765	2.772	5.1	0.7544	9.6785
BBCH 43-45	2019	RGT Planet	control	0.82915	2.5692	5.1972	0.713	9.9528
BBCH 43-45	2019	RGT Planet	control	0.84295	2.796	5.3328	0.7038	9.958
BBCH 43-45	2019	RGT Planet	control	0.87975	2.5812	4.692	0.7061	9.6811
BBCH 43-45	2019	RGT Planet	control	0.8211	3.192	5.58	0.70495	9.802
BBCH 43-45	2019	RGT Planet	control	0.8303	2.6736	5.7732	0.7153	10.1062
BBCH 43-45	2019	RGT Planet	control	0.84755	2.814	4.9452	0.7406	9.3873
BBCH 43-45	2019	RGT Planet	control	0.85215	2.7972	5.16	0.67275	9.2963
BBCH 43-45	2019	RGT Planet	control	0.8671	2.9688	4.788	0.68885	9.5225
BBCH 43-45	2019	RGT Planet	control	0.84295	2.7984	4.5576	0.6923	9.2846
BBCH 43-45	2019	RGT Planet	control	0.828	2.9364	4.434	0.7061	9.6733
BBCH 43-45	2019	RGT Planet	Cu	0.9177	2.5692	5.0544	0.81765	9.2846
BBCH 43-45	2019	RGT Planet	Cu	0.8556	2.7624	4.9368	0.8027	9.672
BBCH 43-45	2019	RGT Planet	Cu	0.84525	2.796	5.1876	0.80385	9.9528
BBCH 43-45	2019	RGT Planet	Cu	0.8303	2.934	4.98	0.74175	10.1725
BBCH 43-45	2019	RGT Planet	Cu	0.84525	3.018	4.788	0.76705	9.9528
BBCH 43-45	2019	RGT Planet	Cu	0.8211	3.1512	5.1072	0.7153	9.1416
BBCH 43-45	2019	RGT Planet	Cu	0.88665	3.1932	5.1984	0.73025	9.113
BBCH 43-45	2019	RGT Planet	Cu	0.8533	2.7744	4.8144	0.7406	9.3964
BBCH 43-45	2019	RGT Planet	Cu	0.84295	2.3736	5.07	0.7498	9.6824
BBCH 43-45	2019	RGT Planet	Cu	0.8303	2.3904	5.1624	0.7475	9.4757
BBCH 43-45	2019	RGT Planet	Cu	0.81765	2.5308	4.9908	0.68425	9.49
BBCH 43-45	2019	RGT Planet	Cu	0.82225	2.9652	5.3292	0.667	9.5719
BBCH 43-45	2019	RGT Planet	Cu	0.82685	3.0648	5.1912	0.7015	9.776
BBCH 43-45	2019	RGT Planet	Cu	0.83375	2.9292	4.8216	0.7061	10.2362
BBCH 43-45	2019	RGT Planet	Cu	0.81765	3.03	4.968	0.7153	10.5482
BBCH 43-45	2019	RGT Planet	Cu	0.89815	3.1344	4.5288	0.7084	10.816
BBCH 43-45	2019	RGT Planet	Cu	0.8556	2.6544	4.3752	0.7061	9.0727
BBCH 43-45	2019	RGT Planet	Cu	0.89815	2.9292	5.3976	0.71875	8.6671
BBCH 43-45	2019	RGT Planet	Cu	0.851	2.424	5.0544	0.7061	9.6863
BBCH 43-45	2019	RGT Planet	Cu	0.8303	2.6748	5.1984	0.70265	9.815
BBCH 43-45	2019	RGT Planet	Mn	0.85905	2.8968	4.968	0.7084	9.2885
BBCH 43-45	2019	RGT Planet	Mn	0.8625	2.94	5.07	0.71875	9.4276
BBCH 43-45	2019	RGT Planet	Mn	0.8786	2.436	5.1876	0.72795	9.49
BBCH 43-45	2019	RGT Planet	Mn	0.88665	3.1932	4.83	0.7061	10.3922
BBCH 43-45	2019	RGT Planet	Mn	0.828	3.0696	4.9872	0.7153	10.582
BBCH 43-45	2019	RGT Planet	Mn	0.8809	2.388	4.8948	0.74175	9.3002
BBCH 43-45	2019	RGT Planet	Mn	0.8717	2.7876	4.776	0.72795	8.6606
BBCH 43-45	2019	RGT Planet	Mn	0.8303	2.9652	5.0064	0.7222	7.826
BBCH 43-45	2019	RGT Planet	Mn	0.8418	3.39	5.07	0.7084	9.3925
BBCH 43-45	2019	RGT Planet	Mn	0.805	2.7972	4.6968	0.68885	9.3587
BBCH 43-45	2019	RGT Planet	Mn	0.78315	2.5704	4.4028	0.67735	9.3925
BBCH 43-45	2019	RGT Planet	Mn	0.7199	4.1292	5.532	0.7268	9.6902
BBCH 43-45	2019	RGT Planet	Mn	0.84295	2.7876	5.0736	0.7061	10.2505
BBCH 43-45	2019	RGT Planet	Mn	0.88665	3.096	4.8672	0.70725	9.6902
BBCH 43-45	2019	RGT Planet	Mn	0.85675	3.132	5.3292	0.76475	10.5456
BBCH 43-45	2019	RGT Planet	Mn	0.79235	2.5368	5.1204	0.736	9.88
BBCH 43-45	2019	RGT Planet	Mn	0.7429	2.43	5.184	0.7199	9.1806
BBCH 43-45	2019	RGT Planet	Mn	0.7314	2.9364	5.8668	0.75325	9.2443
BBCH 43-45	2019	RGT Planet	Mn	0.7475	2.772	4.356	0.7015	8.6606
BBCH 43-45	2019	RGT Planet	Mn	0.7958	2.436	4.26	0.7406	8.1276
BBCH 43-45	2019	RGT Planet	Mo	0.8556	3.0648	4.9368	0.7613	10.0633
BBCH 43-45	2019	RGT Planet	Mo	0.83375	3.144	5.22	0.70725	9.2976
BBCH 43-45	2019	RGT Planet	Mo	0.84295	3.2568	5.064	0.6762	9.386
BBCH 43-45	2019	RGT Planet	Mo	0.81765	3.4584	5.994	0.6463	9.087
BBCH 43-45	2019	RGT Planet	Mo	0.8855	2.568	5.4984	0.7153	8.8387
BBCH 43-45	2019	RGT Planet	Mo	0.9223	2.7876	5.292	0.74405	9.633
BBCH 43-45	2019	RGT Planet	Mo	0.93265	2.892	5.7288	0.64285	9.8254
BBCH 43-45	2019	RGT Planet	Mo	0.9361	3.054	4.7988	0.71875	9.3665
BBCH 43-45	2019	RGT Planet	Mo	0.8901	2.8332	4.164	0.75325	9.6798
BBCH 43-45	2019	RGT Planet	Mo	0.8303	2.9292	4.662	0.7452	9.3067
BBCH 43-45	2019	RGT Planet	Mo	0.8165	3.012	5.07	0.72795	9.672
BBCH 43-45	2019	RGT Planet	Mo	0.897	3.4536	5.184	0.7314	10.1686
BBCH 43-45	2019	RGT Planet	Mo	0.90965	2.934	5.4672	0.7015	10.543
BBCH 43-45	2019	RGT Planet	Mo	0.91885	3.06	5.5872	0.7751	10.699
BBCH 43-45	2019	RGT Planet	Mo	0.85905	3.156	5.64	0.72335	9.6785
BBCH 43-45	2019	RGT Planet	Mo	0.8901	3.3444	5.8212	0.73485	9.4276
BBCH 43-45	2019	RGT Planet	Mo	0.85675	2.9688	5.16	0.736	9.5225
BBCH 43-45	2019	RGT Planet	Mo	0.88665	3.54	4.9368	0.7452	9.2833
BBCH 43-45	2019	RGT Planet	Mo	0.83375	3.456	5.064	0.7498	9.4276
BBCH 43-45	2019	RGT Planet	Mo	0.81765	2.5692	4.794	0.7314	9.5368
BBCH 43-45	2019	RGT Planet	Zn	0.8556	3.03	4.9368	0.76475	10.5846
BBCH 43-45	2019	RGT Planet	Zn	0.8648	3.39	5.1024	0.713	10.7055
BBCH 43-45	2019	RGT Planet	Zn	0.8556	3.252	5.19	0.7061	11.8625
BBCH 43-45	2019	RGT Planet	Zn	0.8303	3.198	5.07	0.7314	11.9665
BBCH 43-45	2019	RGT Planet	Zn	0.80385	2.9364	4.9368	0.76015	10.9863
BBCH 43-45	2019	RGT Planet	Zn	0.8211	2.628	5.0712	0.8073	10.816
BBCH 43-45	2019	RGT Planet	Zn	0.8303	2.7024	5.1024	0.805	10.6925
BBCH 43-45	2019	RGT Planet	Zn	0.81075	3.288	5.1984	0.79465	10.5885
BBCH 43-45	2019	RGT Planet	Zn	0.87975	2.8032	5.412	0.7636	10.8238
BBCH 43-45	2019	RGT Planet	Zn	0.9016	2.658	4.8624	0.7314	10.972
BBCH 43-45	2019	RGT Planet	Zn	0.8556	3.06	4.8012	0.713	10.5846
BBCH 43-45	2019	RGT Planet	Zn	0.8694	3.1392	5.5932	0.7061	11.011
BBCH 43-45	2019	RGT Planet	Zn	0.86825	2.9292	5.2572	0.7015	9.9645
BBCH 43-45	2019	RGT Planet	Zn	0.81765	3.0612	5.196	0.6762	9.6785
BBCH 43-45	2019	RGT Planet	Zn	0.8142	2.928	5.1024	0.6923	9.4445
BBCH 43-45	2019	RGT Planet	Zn	0.89815	2.8536	4.956	0.6946	9.243
BBCH 43-45	2019	RGT Planet	Zn	0.8763	3.0168	4.9452	0.68885	10.7328
BBCH 43-45	2019	RGT Planet	Zn	0.8556	2.7972	5.07	0.7061	10.5885
BBCH 43-45	2019	RGT Planet	Zn	0.90275	2.424	4.9368	0.7153	10.5846
BBCH 43-45	2019	RGT Planet	Zn	0.8878	2.5848	5.07	0.736	9.0922
BBCH 43-45	2020	Baryłka	control	0.868537	2.6652	5.4168	0.774	7.11
BBCH 43-45	2020	Baryłka	control	0.814545	2.628	4.98	0.714	7.24
BBCH 43-45	2020	Baryłka	control	0.806265	2.7852	5.07	0.774	7.33
BBCH 43-45	2020	Baryłka	control	0.7452	2.82	4.7868	0.754	7.81
BBCH 43-45	2020	Baryłka	control	0.758655	2.628	5.292	0.669	8.12
BBCH 43-45	2020	Baryłka	control	0.771075	2.9364	4.998	0.694	7.554
BBCH 43-45	2020	Baryłka	control	0.818685	3.012	5.1024	0.711	7.91
BBCH 43-45	2020	Baryłka	control	0.806265	3.1932	5.4612	0.745	6.694
BBCH 43-45	2020	Baryłka	control	0.80937	3.4536	5.532	0.733	7.52
BBCH 43-45	2020	Baryłka	control	0.771075	2.928	5.1576	0.745	7.749
BBCH 43-45	2020	Baryłka	control	0.826965	3.1932	5.8464	0.755	7.778
BBCH 43-45	2020	Baryłka	control	0.73899	2.91	4.974	0.712	8.235
BBCH 43-45	2020	Baryłka	control	0.79281	2.7972	5.184	0.714	8.33
BBCH 43-45	2020	Baryłka	control	0.808335	3.0216	4.956	0.733	9.11
BBCH 43-45	2020	Baryłka	control	0.785565	2.8428	5.4624	0.745	8.363
BBCH 43-45	2020	Baryłka	control	0.826965	2.8128	5.292	0.736	10.12
BBCH 43-45	2020	Baryłka	control	0.814545	3.012	4.7892	0.722	9.656
BBCH 43-45	2020	Baryłka	control	0.80109	3.1932	4.5288	0.755	9.447
BBCH 43-45	2020	Baryłka	control	0.79281	2.5452	5.1972	0.751	9.925
BBCH 43-45	2020	Baryłka	control	0.735885	2.4384	5.448	0.743	8.997
BBCH 43-45	2020	Baryłka	Cu	0.802	2.99	4.47	0.739	10.44
BBCH 43-45	2020	Baryłka	Cu	0.815	3.02	4.158	0.745	11.05
BBCH 43-45	2020	Baryłka	Cu	0.805	3.05	4.263	0.714	9.448
BBCH 43-45	2020	Baryłka	Cu	0.814	2.779	4.225	0.766	9.05
BBCH 43-45	2020	Baryłka	Cu	0.822	2.812	4.741	0.754	9.774
BBCH 43-45	2020	Baryłka	Cu	0.841	2.905	4.182	0.758	10.025
BBCH 43-45	2020	Baryłka	Cu	0.83	2.554	4.656	0.709	10.13
BBCH 43-45	2020	Baryłka	Cu	0.822	2.361	4.325	0.737	11.025
BBCH 43-45	2020	Baryłka	Cu	0.844	2.441	4.522	0.711	11.332
BBCH 43-45	2020	Baryłka	Cu	0.792	2.554	4.656	0.696	12.02
BBCH 43-45	2020	Baryłka	Cu	0.779	2.277	4.448	0.684	10.55
BBCH 43-45	2020	Baryłka	Cu	0.806	2.99	4.428	0.733	9.454
BBCH 43-45	2020	Baryłka	Cu	0.815	2.978	4.256	0.741	9.114
BBCH 43-45	2020	Baryłka	Cu	0.822	3.025	4.449	0.725	9.25
BBCH 43-45	2020	Baryłka	Cu	0.839	3.011	4.515	0.736	10.14
BBCH 43-45	2020	Baryłka	Cu	0.841	2.774	4.62	0.722	10.363
BBCH 43-45	2020	Baryłka	Cu	0.821	3.255	4.323	0.711	10.252
BBCH 43-45	2020	Baryłka	Cu	0.816	3.332	4.441	0.707	10.447
BBCH 43-45	2020	Baryłka	Cu	0.819	3.29	4.887	0.678	9.74
BBCH 43-45	2020	Baryłka	Cu	0.816	3.48	4.874	0.685	9.982
BBCH 43-45	2020	Baryłka	Mn	0.828	3.12	4.612	0.646	10.14
BBCH 43-45	2020	Baryłka	Mn	0.834	3.25	4.66	0.669	10.225
BBCH 43-45	2020	Baryłka	Mn	0.815	3.411	4.252	0.714	10.363
BBCH 43-45	2020	Baryłka	Mn	0.825	3.252	4.152	0.722	9.458
BBCH 43-45	2020	Baryłka	Mn	0.845	3.152	4.22	0.715	10.12
BBCH 43-45	2020	Baryłka	Mn	0.813	3.263	4.31	0.731	9.774
BBCH 43-45	2020	Baryłka	Mn	0.803	2.944	4.258	0.744	9.985
BBCH 43-45	2020	Baryłka	Mn	0.807	2.441	4.221	0.754	8.457
BBCH 43-45	2020	Baryłka	Mn	0.815	2.52	4.545	0.699	10.252
BBCH 43-45	2020	Baryłka	Mn	0.823	2.616	4.645	0.741	10.147
BBCH 43-45	2020	Baryłka	Mn	0.814	3.125	4.25	0.788	11.662
BBCH 43-45	2020	Baryłka	Mn	0.833	3.252	4.745	0.771	11.625
BBCH 43-45	2020	Baryłka	Mn	0.815	3.412	4.774	0.712	12.412
BBCH 43-45	2020	Baryłka	Mn	0.828	3.333	4.82	0.705	10.252
BBCH 43-45	2020	Baryłka	Mn	0.826	3.025	4.446	0.715	10.995
BBCH 43-45	2020	Baryłka	Mn	0.809	2.885	4.741	0.706	10.774
BBCH 43-45	2020	Baryłka	Mn	0.811	2.945	4.858	0.722	10.884
BBCH 43-45	2020	Baryłka	Mn	0.812	3.22	4.45	0.735	10.662
BBCH 43-45	2020	Baryłka	Mn	0.833	3.412	4.54	0.744	9.994
BBCH 43-45	2020	Baryłka	Mn	0.828	3.001	4.225	0.736	11.454
BBCH 43-45	2020	Baryłka	Mo	0.822	3.52	4.142	0.74	10.1
BBCH 43-45	2020	Baryłka	Mo	0.836	3.452	4.082	0.75	11.45
BBCH 43-45	2020	Baryłka	Mo	0.833	3.335	3.774	0.733	12.11
BBCH 43-45	2020	Baryłka	Mo	0.845	3.111	3.812	0.741	12.325
BBCH 43-45	2020	Baryłka	Mo	0.825	2.88	3.991	0.742	10.41
BBCH 43-45	2020	Baryłka	Mo	0.816	2.745	4.551	0.736	11.002
BBCH 43-45	2020	Baryłka	Mo	0.829	2.665	4.11	0.751	10.159
BBCH 43-45	2020	Baryłka	Mo	0.844	2.82	4.254	0.736	10.258
BBCH 43-45	2020	Baryłka	Mo	0.825	2.847	3.774	0.72	11.32
BBCH 43-45	2020	Baryłka	Mo	0.816	2.336	3.858	0.719	10.226
BBCH 43-45	2020	Baryłka	Mo	0.844	2.414	4.252	0.775	10.447
BBCH 43-45	2020	Baryłka	Mo	0.833	2.514	3.665	0.713	10.662
BBCH 43-45	2020	Baryłka	Mo	0.811	2.99	4.11	0.745	10.447
BBCH 43-45	2020	Baryłka	Mo	0.825	3.41	4.252	0.739	10.336
BBCH 43-45	2020	Baryłka	Mo	0.833	3.52	4.331	0.718	10.151
BBCH 43-45	2020	Baryłka	Mo	0.816	3.614	4.661	0.727	10.258
BBCH 43-45	2020	Baryłka	Mo	0.829	3.881	4.225	0.741	11.326
BBCH 43-45	2020	Baryłka	Mo	0.84	3.22	4.151	0.729	11.225
BBCH 43-45	2020	Baryłka	Mo	0.816	3.41	4.554	0.714	11.47
BBCH 43-45	2020	Baryłka	Mo	0.827	3.542	4.878	0.766	11.05
BBCH 43-45	2020	Baryłka	Zn	0.824	2.914	4.125	0.724	10.08
BBCH 43-45	2020	Baryłka	Zn	0.832	3.29	4.441	0.714	11.258
BBCH 43-45	2020	Baryłka	Zn	0.815	2.41	4.225	0.744	11.065
BBCH 43-45	2020	Baryłka	Zn	0.808	3.441	4.131	0.746	11.85
BBCH 43-45	2020	Baryłka	Zn	0.812	3.258	4.662	0.765	10.974
BBCH 43-45	2020	Baryłka	Zn	0.805	3.464	4.747	0.733	10.85
BBCH 43-45	2020	Baryłka	Zn	0.814	3.028	4.664	0.744	11.778
BBCH 43-45	2020	Baryłka	Zn	0.809	2.745	4.71	0.752	11.848
BBCH 43-45	2020	Baryłka	Zn	0.841	2.882	5.14	0.713	10.664
BBCH 43-45	2020	Baryłka	Zn	0.815	2.745	5.126	0.721	10.325
BBCH 43-45	2020	Baryłka	Zn	0.847	2.665	5.224	0.73	11.447
BBCH 43-45	2020	Baryłka	Zn	0.833	2.914	4.551	0.711	11.25
BBCH 43-45	2020	Baryłka	Zn	0.809	3.441	4.265	0.721	12.02
BBCH 43-45	2020	Baryłka	Zn	0.829	3.515	4.325	0.715	11.32
BBCH 43-45	2020	Baryłka	Zn	0.841	3.332	5.118	0.705	10.41
BBCH 43-45	2020	Baryłka	Zn	0.825	3.13	5.241	0.729	11.94
BBCH 43-45	2020	Baryłka	Zn	0.833	3.284	4.797	0.734	11.884
BBCH 43-45	2020	Baryłka	Zn	0.845	3.331	4.925	0.721	11.764
BBCH 43-45	2020	Baryłka	Zn	0.802	3.441	4.836	0.733	12.85
BBCH 43-45	2020	Baryłka	Zn	0.819	3.551	4.745	0.739	9.47
BBCH 43-45	2020	KWS Irina	control	0.802	2.224	3.848	0.711	8.114
BBCH 43-45	2020	KWS Irina	control	0.799	2.545	3.745	0.698	8.252
BBCH 43-45	2020	KWS Irina	control	0.795	2.62	3.981	0.721	8.141
BBCH 43-45	2020	KWS Irina	control	0.748	2.44	3.412	0.655	9.221
BBCH 43-45	2020	KWS Irina	control	0.813	2.85	4.335	0.639	7.774
BBCH 43-45	2020	KWS Irina	control	0.765	2.311	4.159	0.674	7.165
BBCH 43-45	2020	KWS Irina	control	0.745	3.41	4.774	0.712	6.998
BBCH 43-45	2020	KWS Irina	control	0.7336	2.08	4.145	0.709	7.252
BBCH 43-45	2020	KWS Irina	control	0.794	2.67	3.454	0.679	7.994
BBCH 43-45	2020	KWS Irina	control	0.688	3.521	3.779	0.709	8.141
BBCH 43-45	2020	KWS Irina	control	0.711	3.332	3.851	0.702	8.21
BBCH 43-45	2020	KWS Irina	control	0.804	3.09	3.991	0.711	7.878
BBCH 43-45	2020	KWS Irina	control	0.765	2.798	3.778	0.669	8.181
BBCH 43-45	2020	KWS Irina	control	0.799	2.994	4.025	0.714	8.252
BBCH 43-45	2020	KWS Irina	control	0.814	3.225	4.225	0.709	8.332
BBCH 43-45	2020	KWS Irina	control	0.798	3.111	4.385	0.696	7.989
BBCH 43-45	2020	KWS Irina	control	0.832	2.441	4.552	0.687	7.252
BBCH 43-45	2020	KWS Irina	control	0.719	2.52	4.325	0.711	7.312
BBCH 43-45	2020	KWS Irina	control	0.822	2.349	4.114	0.696	7.221
BBCH 43-45	2020	KWS Irina	control	0.832	2.447	4.282	0.667	6.787
BBCH 43-45	2020	KWS Irina	Cu	0.811	2.71	4.626	0.699	10.441
BBCH 43-45	2020	KWS Irina	Cu	0.82	2.815	4.7	0.678	11.09
BBCH 43-45	2020	KWS Irina	Cu	0.826	3.009	4.332	0.696	10.45
BBCH 43-45	2020	KWS Irina	Cu	0.809	3.115	3.778	0.702	10.321
BBCH 43-45	2020	KWS Irina	Cu	0.814	2.78	3.915	0.711	11.5
BBCH 43-45	2020	KWS Irina	Cu	0.809	2.664	3.774	0.739	9.447
BBCH 43-45	2020	KWS Irina	Cu	0.817	2.991	4.652	0.697	11.25
BBCH 43-45	2020	KWS Irina	Cu	0.824	2.41	4.551	0.702	11.221
BBCH 43-45	2020	KWS Irina	Cu	0.83	1.779	4.745	0.711	10.71
BBCH 43-45	2020	KWS Irina	Cu	0.814	2.142	4.945	0.703	10.551
BBCH 43-45	2020	KWS Irina	Cu	0.82	2.645	4.814	0.719	10.232
BBCH 43-45	2020	KWS Irina	Cu	0.822	2.551	4.991	0.708	10.14
BBCH 43-45	2020	KWS Irina	Cu	0.819	2.774	4.798	0.699	9.745
BBCH 43-45	2020	KWS Irina	Cu	0.8	2.8	4.445	0.647	9.994
BBCH 43-45	2020	KWS Irina	Cu	0.817	3.058	4.745	0.732	10.332
BBCH 43-45	2020	KWS Irina	Cu	0.822	3.441	4.898	0.714	10.412
BBCH 43-45	2020	KWS Irina	Cu	0.829	3.445	3.94	0.725	11.41
BBCH 43-45	2020	KWS Irina	Cu	0.815	2.994	4.525	0.684	10.65
BBCH 43-45	2020	KWS Irina	Cu	0.824	3.645	4.509	0.719	10.554
BBCH 43-45	2020	KWS Irina	Cu	0.833	3.472	4.51	0.705	9.778
BBCH 43-45	2020	KWS Irina	Mn	0.814	3.15	4.331	0.656	9.205
BBCH 43-45	2020	KWS Irina	Mn	0.822	2.441	4.202	0.615	9.441
BBCH 43-45	2020	KWS Irina	Mn	0.809	2.449	4.949	0.712	10.515
BBCH 43-45	2020	KWS Irina	Mn	0.831	2.85	3.997	0.714	10.412
BBCH 43-45	2020	KWS Irina	Mn	0.829	3.141	4.114	0.695	9.452
BBCH 43-45	2020	KWS Irina	Mn	0.816	3.033	4.445	0.71	9.848
BBCH 43-45	2020	KWS Irina	Mn	0.817	2.884	4.625	0.725	10.745
BBCH 43-45	2020	KWS Irina	Mn	0.833	2.858	3.774	0.728	9.52
BBCH 43-45	2020	KWS Irina	Mn	0.814	2.464	3.159	0.766	9.48
BBCH 43-45	2020	KWS Irina	Mn	0.794	3.154	4.009	0.719	10.241
BBCH 43-45	2020	KWS Irina	Mn	0.821	3.21	3.285	0.749	10.332
BBCH 43-45	2020	KWS Irina	Mn	0.831	2.939	4.665	0.709	9.992
BBCH 43-45	2020	KWS Irina	Mn	0.822	2.754	4.15	0.684	9.917
BBCH 43-45	2020	KWS Irina	Mn	0.829	3.315	4.363	0.724	10.441
BBCH 43-45	2020	KWS Irina	Mn	0.831	3.419	3.947	0.7	10.252
BBCH 43-45	2020	KWS Irina	Mn	0.824	3.005	4.01	0.689	10.3
BBCH 43-45	2020	KWS Irina	Mn	0.816	2.51	4.55	0.741	9.115
BBCH 43-45	2020	KWS Irina	Mn	0.794	2.449	4.656	0.708	9.002
BBCH 43-45	2020	KWS Irina	Mn	0.821	2.132	4.514	0.732	8.444
BBCH 43-45	2020	KWS Irina	Mn	0.826	2.508	4.441	0.681	8.15
BBCH 43-45	2020	KWS Irina	Mo	0.822	2.941	4.212	0.664	8.412
BBCH 43-45	2020	KWS Irina	Mo	0.834	2.779	4.145	0.714	8.656
BBCH 43-45	2020	KWS Irina	Mo	0.83	3.025	4.178	0.721	9.258
BBCH 43-45	2020	KWS Irina	Mo	0.84	3.114	3.774	0.714	9.81
BBCH 43-45	2020	KWS Irina	Mo	0.819	2.778	3.99	0.736	8.741
BBCH 43-45	2020	KWS Irina	Mo	0.802	2.848	4.524	0.741	9.331
BBCH 43-45	2020	KWS Irina	Mo	0.814	2.664	4.32	0.715	9.251
BBCH 43-45	2020	KWS Irina	Mo	0.813	2.851	4.661	0.7215	8.994
BBCH 43-45	2020	KWS Irina	Mo	0.807	2.949	4.28	0.7441	9.118
BBCH 43-45	2020	KWS Irina	Mo	0.824	3.232	3.784	0.726	9.3
BBCH 43-45	2020	KWS Irina	Mo	0.802	2.8	4.308	0.73	9.14
BBCH 43-45	2020	KWS Irina	Mo	0.794	3.06	3.947	0.715	9.252
BBCH 43-45	2020	KWS Irina	Mo	0.833	2.774	4.332	0.728	8.549
BBCH 43-45	2020	KWS Irina	Mo	0.824	2.354	4.278	0.734	8.754
BBCH 43-45	2020	KWS Irina	Mo	0.816	2.864	4.1	0.708	9.661
BBCH 43-45	2020	KWS Irina	Mo	0.824	2.774	4.662	0.733	9.142
BBCH 43-45	2020	KWS Irina	Mo	0.818	2.869	3.674	0.688	7.994
BBCH 43-45	2020	KWS Irina	Mo	0.806	3.02	4.552	0.711	7.45
BBCH 43-45	2020	KWS Irina	Mo	0.786	3.114	4.61	0.669	6.668
BBCH 43-45	2020	KWS Irina	Mo	0.779	3.331	4.501	0.649	7.11
BBCH 43-45	2020	KWS Irina	Zn	0.812	2.99	4.15	0.701	8.62
BBCH 43-45	2020	KWS Irina	Zn	0.808	2.48	4.095	0.699	9.42
BBCH 43-45	2020	KWS Irina	Zn	0.819	3.142	4.385	0.687	9.47
BBCH 43-45	2020	KWS Irina	Zn	0.825	3.225	4.252	0.705	10.454
BBCH 43-45	2020	KWS Irina	Zn	0.83	2.745	4.362	0.679	10.11
BBCH 43-45	2020	KWS Irina	Zn	0.822	2.6	4.51	0.704	8.18
BBCH 43-45	2020	KWS Irina	Zn	0.829	2.554	3.979	0.721	8.2
BBCH 43-45	2020	KWS Irina	Zn	0.817	2.828	4.154	0.711	9.65
BBCH 43-45	2020	KWS Irina	Zn	0.832	3.141	4.228	0.705	10.32
BBCH 43-45	2020	KWS Irina	Zn	0.819	2.945	4.665	0.731	9.545
BBCH 43-45	2020	KWS Irina	Zn	0.803	2.888	4.515	0.72	9.884
BBCH 43-45	2020	KWS Irina	Zn	0.809	3.332	3.97	0.711	10.252
BBCH 43-45	2020	KWS Irina	Zn	0.799	3.14	4.61	0.728	11
BBCH 43-45	2020	KWS Irina	Zn	0.814	2.745	4.252	0.704	9.454
BBCH 43-45	2020	KWS Irina	Zn	0.812	3.08	4.292	0.706	8.31
BBCH 43-45	2020	KWS Irina	Zn	0.808	2.884	4.31	0.715	8.002
BBCH 43-45	2020	KWS Irina	Zn	0.802	2.665	4.277	0.703	7.884
BBCH 43-45	2020	KWS Irina	Zn	0.821	2.79	4.302	0.697	9.2
BBCH 43-45	2020	KWS Irina	Zn	0.831	3.11	4.282	0.69	8.665
BBCH 43-45	2020	KWS Irina	Zn	0.829	3.09	4.166	0.701	8.3
BBCH 43-45	2020	RGT Planet	control	0.814	3.331	4.551	0.733	9.112
BBCH 43-45	2020	RGT Planet	control	0.825	3.212	4.815	0.747	9.252
BBCH 43-45	2020	RGT Planet	control	0.833	3.005	4.326	0.751	8.778
BBCH 43-45	2020	RGT Planet	control	0.815	3.071	3.949	0.761	9.818
BBCH 43-45	2020	RGT Planet	control	0.821	3.212	3.774	0.725	8.445
BBCH 43-45	2020	RGT Planet	control	0.809	3.665	4.115	0.746	8.265
BBCH 43-45	2020	RGT Planet	control	0.833	3.516	4.662	0.697	8.059
BBCH 43-45	2020	RGT Planet	control	0.82	3.705	4.858	0.691	9.141
BBCH 43-45	2020	RGT Planet	control	0.815	3.412	4.719	0.661	9.364
BBCH 43-45	2020	RGT Planet	control	0.826	3.332	4.656	0.7452	9.947
BBCH 43-45	2020	RGT Planet	control	0.814	3.51	4.821	0.758	8.905
BBCH 43-45	2020	RGT Planet	control	0.808	3.5	4.661	0.776	8.221
BBCH 43-45	2020	RGT Planet	control	0.8	3.412	4.252	0.794	9.41
BBCH 43-45	2020	RGT Planet	control	0.826	3.36	4.884	0.782	9.361
BBCH 43-45	2020	RGT Planet	control	0.814	3.784	4.746	0.775	8.35
BBCH 43-45	2020	RGT Planet	control	0.81	3.18	4.667	0.791	9.11
BBCH 43-45	2020	RGT Planet	control	0.819	3.065	4.825	0.704	8.762
BBCH 43-45	2020	RGT Planet	control	0.813	3.64	4.165	0.73	8.85
BBCH 43-45	2020	RGT Planet	control	0.802	3.749	4.885	0.736	9.26
BBCH 43-45	2020	RGT Planet	control	0.804	3.854	4.917	0.729	9.782
BBCH 43-45	2020	RGT Planet	Cu	0.805	2.58	4.147	0.692	8.14
BBCH 43-45	2020	RGT Planet	Cu	0.811	3.1	3.25	0.766	8.205
BBCH 43-45	2020	RGT Planet	Cu	0.797	2.69	4.09	0.68	9.14
BBCH 43-45	2020	RGT Planet	Cu	0.83	3.216	4.011	0.646	8.626
BBCH 43-45	2020	RGT Planet	Cu	0.821	2.779	3.236	0.772	7.419
BBCH 43-45	2020	RGT Planet	Cu	0.814	2.59	3.334	0.684	8.664
BBCH 43-45	2020	RGT Planet	Cu	0.826	3.471	4.58	0.659	7.525
BBCH 43-45	2020	RGT Planet	Cu	0.819	3.12	4.774	0.688	8.134
BBCH 43-45	2020	RGT Planet	Cu	0.822	2.552	3.958	0.749	8.614
BBCH 43-45	2020	RGT Planet	Cu	0.814	2.791	4.261	0.676	8.09
BBCH 43-45	2020	RGT Planet	Cu	0.832	2.14	4.794	0.695	8.282
BBCH 43-45	2020	RGT Planet	Cu	0.816	2.62	4.652	0.777	7.664
BBCH 43-45	2020	RGT Planet	Cu	0.809	2.451	4.58	0.681	9.412
BBCH 43-45	2020	RGT Planet	Cu	0.827	2.47	4.519	0.719	8.338
BBCH 43-45	2020	RGT Planet	Cu	0.814	2.315	4.714	0.702	8.474
BBCH 43-45	2020	RGT Planet	Cu	0.822	2.12	4.292	0.689	8.002
BBCH 43-45	2020	RGT Planet	Cu	0.825	2.571	4.765	0.694	8.02
BBCH 43-45	2020	RGT Planet	Cu	0.819	2.613	4.8	0.677	9.012
BBCH 43-45	2020	RGT Planet	Cu	0.805	2.205	4.325	0.698	8.626
BBCH 43-45	2020	RGT Planet	Cu	0.807	2.137	4.282	0.703	8
BBCH 43-45	2020	RGT Planet	Mn	0.799	2.72	4.45	0.694	9.142
BBCH 43-45	2020	RGT Planet	Mn	0.805	2.48	4.366	0.699	9
BBCH 43-45	2020	RGT Planet	Mn	0.794	2.99	4.316	0.679	8.47
BBCH 43-45	2020	RGT Planet	Mn	0.816	3.01	4.252	0.684	9.32
BBCH 43-45	2020	RGT Planet	Mn	0.825	2.52	4.338	0.699	9.114
BBCH 43-45	2020	RGT Planet	Mn	0.832	2.779	4.514	0.701	8.798
BBCH 43-45	2020	RGT Planet	Mn	0.817	2.649	4.13	0.664	8.669
BBCH 43-45	2020	RGT Planet	Mn	0.809	2.818	4.616	0.625	8.54
BBCH 43-45	2020	RGT Planet	Mn	0.813	2.7	4.5	0.71	8.21
BBCH 43-45	2020	RGT Planet	Mn	0.824	2.991	4.25	0.639	8.346
BBCH 43-45	2020	RGT Planet	Mn	0.83	2.858	4.361	0.697	9.33
BBCH 43-45	2020	RGT Planet	Mn	0.818	2.864	3.99	0.69	9.111
BBCH 43-45	2020	RGT Planet	Mn	0.824	2.49	4.415	0.682	8.745
BBCH 43-45	2020	RGT Planet	Mn	0.812	2.759	4.378	0.679	8.99
BBCH 43-45	2020	RGT Planet	Mn	0.821	2.914	3.845	0.694	8.006
BBCH 43-45	2020	RGT Planet	Mn	0.819	2.694	4.448	0.683	9.325
BBCH 43-45	2020	RGT Planet	Mn	0.816	2.647	4.616	0.67	9.441
BBCH 43-45	2020	RGT Planet	Mn	0.821	2.578	4.295	0.708	9.325
BBCH 43-45	2020	RGT Planet	Mn	0.83	2.47	4.48	0.709	9.474
BBCH 43-45	2020	RGT Planet	Mn	0.824	2.93	4.67	0.719	8.7
BBCH 43-45	2020	RGT Planet	Mo	0.825	2.62	4.5	0.711	8.48
BBCH 43-45	2020	RGT Planet	Mo	0.836	2.78	4.626	0.704	8.741
BBCH 43-45	2020	RGT Planet	Mo	0.82	2.994	4.47	0.7	9.02
BBCH 43-45	2020	RGT Planet	Mo	0.844	2.785	4.152	0.696	8.662
BBCH 43-45	2020	RGT Planet	Mo	0.839	3.02	4.74	0.714	8.515
BBCH 43-45	2020	RGT Planet	Mo	0.822	3.114	4.6	0.705	8.756
BBCH 43-45	2020	RGT Planet	Mo	0.81	2.974	4.51	0.712	9.212
BBCH 43-45	2020	RGT Planet	Mo	0.809	2.63	4.856	0.705	8.784
BBCH 43-45	2020	RGT Planet	Mo	0.814	3.02	5.11	0.696	9.23
BBCH 43-45	2020	RGT Planet	Mo	0.799	3.26	4.252	0.679	9.14
BBCH 43-45	2020	RGT Planet	Mo	0.815	2.745	4.31	0.7	8.78
BBCH 43-45	2020	RGT Planet	Mo	0.826	2.558	4.859	0.711	9.23
BBCH 43-45	2020	RGT Planet	Mo	0.83	2.616	4.92	0.714	9.441
BBCH 43-45	2020	RGT Planet	Mo	0.817	3.04	4.658	0.712	8.26
BBCH 43-45	2020	RGT Planet	Mo	0.82	3.141	4.661	0.709	9.451
BBCH 43-45	2020	RGT Planet	Mo	0.835	3.2	4.425	0.69	9.36
BBCH 43-45	2020	RGT Planet	Mo	0.819	3.029	4.71	0.689	9.108
BBCH 43-45	2020	RGT Planet	Mo	0.824	2.797	4.661	0.7	9.14
BBCH 43-45	2020	RGT Planet	Mo	0.82	2.816	4.729	0.703	9.323
BBCH 43-45	2020	RGT Planet	Mo	0.825	3.2	4.814	0.713	8.981
BBCH 43-45	2020	RGT Planet	Zn	0.808	2.87	4.185	0.629	8.022
BBCH 43-45	2020	RGT Planet	Zn	0.784	2.994	4.374	0.656	8.142
BBCH 43-45	2020	RGT Planet	Zn	0.799	2.625	4.525	0.625	8.32
BBCH 43-45	2020	RGT Planet	Zn	0.769	2.852	4.15	0.694	8.21
BBCH 43-45	2020	RGT Planet	Zn	0.801	2.779	3.995	0.714	8.332
BBCH 43-45	2020	RGT Planet	Zn	0.814	2.45	4.689	0.722	8.51
BBCH 43-45	2020	RGT Planet	Zn	0.82	3	4.889	0.719	8.21
BBCH 43-45	2020	RGT Planet	Zn	0.831	3.165	4.754	0.71	8.14
BBCH 43-45	2020	RGT Planet	Zn	0.794	2.79	4.82	0.669	8.336
BBCH 43-45	2020	RGT Planet	Zn	0.814	2.885	4.675	0.689	8.454
BBCH 43-45	2020	RGT Planet	Zn	0.825	3.011	5.002	0.73	8.2
BBCH 43-45	2020	RGT Planet	Zn	0.833	2.79	4.956	0.688	8.11
BBCH 43-45	2020	RGT Planet	Zn	0.814	2.52	4.52	0.729	7.58
BBCH 43-45	2020	RGT Planet	Zn	0.826	2.88	4.87	0.714	7.79
BBCH 43-45	2020	RGT Planet	Zn	0.819	3.236	4.897	0.712	8.14
BBCH 43-45	2020	RGT Planet	Zn	0.833	3.3	4.9	0.725	8.39
BBCH 43-45	2020	RGT Planet	Zn	0.829	3.142	4.663	0.72	8.42
BBCH 43-45	2020	RGT Planet	Zn	0.831	2.885	4.914	0.714	8.5
BBCH 43-45	2020	RGT Planet	Zn	0.829	2.476	4.56	0.709	7.84
BBCH 43-45	2020	RGT Planet	Zn	0.83	2.948	4.44	0.723	7.774
BBCH 43-45	2021	Baryłka	control	0.8	3.15	4.625	0.711	10.454
BBCH 43-45	2021	Baryłka	control	0.814	3.258	4.78	0.709	9.158
BBCH 43-45	2021	Baryłka	control	0.823	3.262	4.52	0.71	9.82
BBCH 43-45	2021	Baryłka	control	0.802	3.491	4.889	0.714	10.36
BBCH 43-45	2021	Baryłka	control	0.8	3.005	4.925	0.722	7.85
BBCH 43-45	2021	Baryłka	control	0.83	3.41	4.878	0.723	10.21
BBCH 43-45	2021	Baryłka	control	0.814	3.575	4.551	0.7	9.365
BBCH 43-45	2021	Baryłka	control	0.803	3.662	4.789	0.731	9.47
BBCH 43-45	2021	Baryłka	control	0.799	3.74	5.12	0.728	8.452
BBCH 43-45	2021	Baryłka	control	0.805	3.825	4.979	0.714	9.12
BBCH 43-45	2021	Baryłka	control	0.814	3.45	4.62	0.736	9.253
BBCH 43-45	2021	Baryłka	control	0.808	3.76	4.552	0.735	10.64
BBCH 43-45	2021	Baryłka	control	0.812	3.225	4.362	0.728	10.585
BBCH 43-45	2021	Baryłka	control	0.82	3.159	4.12	0.726	11.4
BBCH 43-45	2021	Baryłka	control	0.789	2.887	4.47	0.73	10.41
BBCH 43-45	2021	Baryłka	control	0.821	2.78	5.036	0.718	9.87
BBCH 43-45	2021	Baryłka	control	0.822	3.452	5.02	0.725	8.45
BBCH 43-45	2021	Baryłka	control	0.814	3.13	4.441	0.709	10.652
BBCH 43-45	2021	Baryłka	control	0.826	3.27	4.1	0.726	10.108
BBCH 43-45	2021	Baryłka	control	0.829	3.41	3.989	0.707	10.12
BBCH 43-45	2021	Baryłka	Cu	0.825	3.74	4.85	0.71	11.85
BBCH 43-45	2021	Baryłka	Cu	0.821	3.52	4.662	0.725	12.052
BBCH 43-45	2021	Baryłka	Cu	0.83	3.474	4.878	0.73	11.95
BBCH 43-45	2021	Baryłka	Cu	0.819	3.84	4.902	0.745	12.62
BBCH 43-45	2021	Baryłka	Cu	0.817	3.669	4.74	0.766	12.885
BBCH 43-45	2021	Baryłka	Cu	0.822	3.85	4.923	0.739	12.74
BBCH 43-45	2021	Baryłka	Cu	0.825	3.75	5.11	0.709	12.025
BBCH 43-45	2021	Baryłka	Cu	0.83	3.884	4.49	0.725	12.11
BBCH 43-45	2021	Baryłka	Cu	0.815	3.95	5.212	0.741	12.32
BBCH 43-45	2021	Baryłka	Cu	0.82	3.744	5.02	0.733	11.99
BBCH 43-45	2021	Baryłka	Cu	0.809	3.65	4.7	0.749	12.25
BBCH 43-45	2021	Baryłka	Cu	0.821	3.665	4.92	0.74	11.84
BBCH 43-45	2021	Baryłka	Cu	0.82	3.7	5.025	0.756	12.18
BBCH 43-45	2021	Baryłka	Cu	0.829	3.628	4.765	0.766	12.21
BBCH 43-45	2021	Baryłka	Cu	0.817	3.55	4.6	0.778	12.515
BBCH 43-45	2021	Baryłka	Cu	0.809	3.785	4.82	0.741	12.412
BBCH 43-45	2021	Baryłka	Cu	0.82	3.62	4.775	0.734	11.665
BBCH 43-45	2021	Baryłka	Cu	0.815	4.22	4.84	0.734	11.252
BBCH 43-45	2021	Baryłka	Cu	0.823	3.557	4.846	0.74	11.949
BBCH 43-45	2021	Baryłka	Cu	0.83	3.609	4.91	0.742	12.148
BBCH 43-45	2021	Baryłka	Mn	0.815	4.212	4.949	0.745	11.98
BBCH 43-45	2021	Baryłka	Mn	0.832	4.11	5.11	0.732	11.878
BBCH 43-45	2021	Baryłka	Mn	0.819	3.822	4.871	0.745	12.252
BBCH 43-45	2021	Baryłka	Mn	0.825	3.745	4.78	0.737	12.452
BBCH 43-45	2021	Baryłka	Mn	0.829	3.445	4.925	0.74	12.85
BBCH 43-45	2021	Baryłka	Mn	0.831	3.656	4.9	0.741	12.774
BBCH 43-45	2021	Baryłka	Mn	0.828	3.745	4.845	0.728	11.852
BBCH 43-45	2021	Baryłka	Mn	0.83	3.452	4.74	0.741	12.052
BBCH 43-45	2021	Baryłka	Mn	0.814	3.773	4.925	0.738	12.332
BBCH 43-45	2021	Baryłka	Mn	0.799	3.945	4.99	0.739	12.412
BBCH 43-45	2021	Baryłka	Mn	0.84	3.995	5.14	0.741	12.05
BBCH 43-45	2021	Baryłka	Mn	0.836	3.78	5.02	0.738	12.64
BBCH 43-45	2021	Baryłka	Mn	0.841	3.636	4.852	0.741	12.885
BBCH 43-45	2021	Baryłka	Mn	0.846	3	4.76	0.745	11.95
BBCH 43-45	2021	Baryłka	Mn	0.83	3.782	4.841	0.738	11.84
BBCH 43-45	2021	Baryłka	Mn	0.829	3.845	4.775	0.749	12.784
BBCH 43-45	2021	Baryłka	Mn	0.838	3.82	4.62	0.74	12.052
BBCH 43-45	2021	Baryłka	Mn	0.84	3.814	4.88	0.737	11.74
BBCH 43-45	2021	Baryłka	Mn	0.8	3.914	4.912	0.738	12.325
BBCH 43-45	2021	Baryłka	Mn	0.832	4.11	4.75	0.741	12.41
BBCH 43-45	2021	Baryłka	Mo	0.824	3.63	4.821	0.755	11.97
BBCH 43-45	2021	Baryłka	Mo	0.821	3.136	5.0212	0.714	12.25
BBCH 43-45	2021	Baryłka	Mo	0.823	3.41	5.111	0.749	13.05
BBCH 43-45	2021	Baryłka	Mo	0.831	3.523	4.661	0.733	11.48
BBCH 43-45	2021	Baryłka	Mo	0.83	3.441	4.814	0.709	9.545
BBCH 43-45	2021	Baryłka	Mo	0.822	4.102	4.791	0.731	9.542
BBCH 43-45	2021	Baryłka	Mo	0.829	4.252	5.002	0.739	11.62
BBCH 43-45	2021	Baryłka	Mo	0.816	4.016	4.2	0.74	12.65
BBCH 43-45	2021	Baryłka	Mo	0.815	4.025	4.662	0.738	12.94
BBCH 43-45	2021	Baryłka	Mo	0.838	3.412	4.848	0.741	11.74
BBCH 43-45	2021	Baryłka	Mo	0.836	3.252	4.14	0.729	12.259
BBCH 43-45	2021	Baryłka	Mo	0.84	3.16	5.336	0.733	13.025
BBCH 43-45	2021	Baryłka	Mo	0.83	3.784	5.471	0.728	13.44
BBCH 43-45	2021	Baryłka	Mo	0.812	4.21	5.28	0.738	12.226
BBCH 43-45	2021	Baryłka	Mo	0.822	3.336	4.94	0.744	13.059
BBCH 43-45	2021	Baryłka	Mo	0.826	3.646	4.677	0.714	11.625
BBCH 43-45	2021	Baryłka	Mo	0.828	3.142	4.582	0.727	11.84
BBCH 43-45	2021	Baryłka	Mo	0.812	3.879	4.7	0.73	12.08
BBCH 43-45	2021	Baryłka	Mo	0.809	3.991	4.55	0.714	11.74
BBCH 43-45	2021	Baryłka	Mo	0.833	4.21	4.221	0.732	12.542
BBCH 43-45	2021	Baryłka	Zn	0.825	3.645	4.552	0.73	11.52
BBCH 43-45	2021	Baryłka	Zn	0.819	3.774	4.71	0.739	12.06
BBCH 43-45	2021	Baryłka	Zn	0.835	3.82	4.745	0.737	12.36
BBCH 43-45	2021	Baryłka	Zn	0.822	3.626	4.812	0.742	13.025
BBCH 43-45	2021	Baryłka	Zn	0.831	3.746	4.69	0.73	13.41
BBCH 43-45	2021	Baryłka	Zn	0.832	3.52	4.82	0.728	12.52
BBCH 43-45	2021	Baryłka	Zn	0.834	3.441	4.665	0.726	12.12
BBCH 43-45	2021	Baryłka	Zn	0.831	3.225	4.713	0.735	10.545
BBCH 43-45	2021	Baryłka	Zn	0.83	3.334	4.847	0.736	11.98
BBCH 43-45	2021	Baryłka	Zn	0.828	3.62	4.52	0.744	12.065
BBCH 43-45	2021	Baryłka	Zn	0.831	3.784	4.44	0.722	12.222
BBCH 43-45	2021	Baryłka	Zn	0.833	3.452	4.81	0.712	11.74
BBCH 43-45	2021	Baryłka	Zn	0.839	3.525	4.623	0.727	11.656
BBCH 43-45	2021	Baryłka	Zn	0.812	3.132	4.75	0.726	11.452
BBCH 43-45	2021	Baryłka	Zn	0.831	3.252	4.82	0.72	11.38
BBCH 43-45	2021	Baryłka	Zn	0.839	3.441	4.89	0.72	10.884
BBCH 43-45	2021	Baryłka	Zn	0.828	3.552	4.71	0.714	11.454
BBCH 43-45	2021	Baryłka	Zn	0.831	3.69	4.252	0.728	11.2
BBCH 43-45	2021	Baryłka	Zn	0.829	3.528	4.778	0.722	12.336
BBCH 43-45	2021	Baryłka	Zn	0.827	3.6	4.696	0.734	12.069
BBCH 43-45	2021	KWS Irina	control	0.802	2.224	3.41	0.702	9.14
BBCH 43-45	2021	KWS Irina	control	0.744	2.625	4.12	0.699	10.15
BBCH 43-45	2021	KWS Irina	control	0.795	2.669	4.33	0.67	9.452
BBCH 43-45	2021	KWS Irina	control	0.803	2.742	3.651	0.676	8.522
BBCH 43-45	2021	KWS Irina	control	0.8	2.123	3.442	0.695	10.45
BBCH 43-45	2021	KWS Irina	control	0.8	2.885	3.52	0.701	11.252
BBCH 43-45	2021	KWS Irina	control	0.704	2.45	4.494	0.685	9.22
BBCH 43-45	2021	KWS Irina	control	0.794	2.15	3.21	0.693	10.24
BBCH 43-45	2021	KWS Irina	control	0.7	2.33	3.092	0.702	8.15
BBCH 43-45	2021	KWS Irina	control	0.805	2.61	3.145	0.713	8.45
BBCH 43-45	2021	KWS Irina	control	0.813	2.559	2.774	0.674	7.454
BBCH 43-45	2021	KWS Irina	control	0.826	2.472	3.221	0.695	8.22
BBCH 43-45	2021	KWS Irina	control	0.754	2.451	2.119	0.699	8.19
BBCH 43-45	2021	KWS Irina	control	0.825	1.998	2.215	0.705	7.141
BBCH 43-45	2021	KWS Irina	control	0.816	1.787	2.192	0.709	8.29
BBCH 43-45	2021	KWS Irina	control	0.825	2.114	3.22	0.7	9.025
BBCH 43-45	2021	KWS Irina	control	0.819	2.19	3.159	0.699	9.19
BBCH 43-45	2021	KWS Irina	control	0.799	2.336	3.335	0.715	8.362
BBCH 43-45	2021	KWS Irina	control	0.779	2.245	3.65	0.728	8.44
BBCH 43-45	2021	KWS Irina	control	0.787	2.115	3.445	0.714	8.03
BBCH 43-45	2021	KWS Irina	Cu	0.832	3.221	5.242	0.734	10.25
BBCH 43-45	2021	KWS Irina	Cu	0.822	2.452	3.25	0.722	10.41
BBCH 43-45	2021	KWS Irina	Cu	0.829	3.412	3.336	0.708	10.336
BBCH 43-45	2021	KWS Irina	Cu	0.83	4.025	4.14	0.7	11.252
BBCH 43-45	2021	KWS Irina	Cu	0.819	3.774	5.22	0.71	10.26
BBCH 43-45	2021	KWS Irina	Cu	0.836	3.85	4.61	0.732	12.74
BBCH 43-45	2021	KWS Irina	Cu	0.834	4.125	4.252	0.696	8.44
BBCH 43-45	2021	KWS Irina	Cu	0.827	3.025	4.746	0.68	8.12
BBCH 43-45	2021	KWS Irina	Cu	0.819	4.25	5.22	0.711	9.74
BBCH 43-45	2021	KWS Irina	Cu	0.817	3.52	5.131	0.708	9.66
BBCH 43-45	2021	KWS Irina	Cu	0.825	3.952	5.26	0.712	10.452
BBCH 43-45	2021	KWS Irina	Cu	0.819	3.77	4.99	0.699	11.421
BBCH 43-45	2021	KWS Irina	Cu	0.831	3.059	4.85	0.72	8.74
BBCH 43-45	2021	KWS Irina	Cu	0.822	2.46	4.67	0.735	9.11
BBCH 43-45	2021	KWS Irina	Cu	0.819	2.332	5.036	0.718	11.363
BBCH 43-45	2021	KWS Irina	Cu	0.822	2.452	4.997	0.721	11.47
BBCH 43-45	2021	KWS Irina	Cu	0.817	2.28	4.82	0.713	12.052
BBCH 43-45	2021	KWS Irina	Cu	0.808	3.17	4.65	0.728	11.78
BBCH 43-45	2021	KWS Irina	Cu	0.803	2.05	5.25	0.722	11.32
BBCH 43-45	2021	KWS Irina	Cu	0.802	4.774	5.35	0.732	8.14
BBCH 43-45	2021	KWS Irina	Mn	0.812	3.23	4.85	0.722	9.94
BBCH 43-45	2021	KWS Irina	Mn	0.817	3.14	4.94	0.714	9.5
BBCH 43-45	2021	KWS Irina	Mn	0.822	3.29	3.74	0.723	10.41
BBCH 43-45	2021	KWS Irina	Mn	0.819	3.33	3.29	0.73	11.95
BBCH 43-45	2021	KWS Irina	Mn	0.83	3.41	4.7	0.722	10.2
BBCH 43-45	2021	KWS Irina	Mn	0.817	3.25	4.15	0.72	11.36
BBCH 43-45	2021	KWS Irina	Mn	0.82	2.88	3.94	0.722	11.3
BBCH 43-45	2021	KWS Irina	Mn	0.832	2.95	4.749	0.736	12.252
BBCH 43-45	2021	KWS Irina	Mn	0.8	3.41	4.889	0.72	12.02
BBCH 43-45	2021	KWS Irina	Mn	0.81	3.558	4.97	0.708	11.45
BBCH 43-45	2021	KWS Irina	Mn	0.802	3.44	5.21	0.729	10.47
BBCH 43-45	2021	KWS Irina	Mn	0.801	2.77	5.02	0.703	10.98
BBCH 43-45	2021	KWS Irina	Mn	0.819	3.61	5	0.7	10.08
BBCH 43-45	2021	KWS Irina	Mn	0.821	3.25	5.159	0.719	9.26
BBCH 43-45	2021	KWS Irina	Mn	0.82	3.75	4.99	0.716	11.05
BBCH 43-45	2021	KWS Irina	Mn	0.82	3.6	4.62	0.709	9.41
BBCH 43-45	2021	KWS Irina	Mn	0.814	3.42	4.55	0.714	8.74
BBCH 43-45	2021	KWS Irina	Mn	0.829	3.31	4.77	0.721	8.14
BBCH 43-45	2021	KWS Irina	Mn	0.83	3.111	5.19	0.73	12.05
BBCH 43-45	2021	KWS Irina	Mn	0.825	3.29	4.774	0.714	11.85
BBCH 43-45	2021	KWS Irina	Mo	0.83	3.11	4.441	0.712	12.44
BBCH 43-45	2021	KWS Irina	Mo	0.828	3.23	4.84	0.722	11.251
BBCH 43-45	2021	KWS Irina	Mo	0.83	3.14	4.952	0.733	10.622
BBCH 43-45	2021	KWS Irina	Mo	0.819	3.441	5.12	0.728	9.852
BBCH 43-45	2021	KWS Irina	Mo	0.81	3.332	5.029	0.724	12.025
BBCH 43-45	2021	KWS Irina	Mo	0.82	3.41	4.774	0.711	12.33
BBCH 43-45	2021	KWS Irina	Mo	0.819	3.51	4.84	0.721	10.41
BBCH 43-45	2021	KWS Irina	Mo	0.827	3.67	4.745	0.711	10.24
BBCH 43-45	2021	KWS Irina	Mo	0.823	4.11	4.452	0.699	11.62
BBCH 43-45	2021	KWS Irina	Mo	0.811	3.05	4.66	0.721	12.02
BBCH 43-45	2021	KWS Irina	Mo	0.821	3.062	4.221	0.712	10.774
BBCH 43-45	2021	KWS Irina	Mo	0.83	3.11	4.335	0.708	11.8
BBCH 43-45	2021	KWS Irina	Mo	0.819	3.342	4.4	0.702	10.87
BBCH 43-45	2021	KWS Irina	Mo	0.821	3.284	4.25	0.721	10.77
BBCH 43-45	2021	KWS Irina	Mo	0.82	3.412	4.62	0.72	11.62
BBCH 43-45	2021	KWS Irina	Mo	0.822	3.252	4.712	0.731	10.41
BBCH 43-45	2021	KWS Irina	Mo	0.83	3.062	4.814	0.732	11.1
BBCH 43-45	2021	KWS Irina	Mo	0.819	3.11	4.656	0.72	10.656
BBCH 43-45	2021	KWS Irina	Mo	0.817	3.16	4.72	0.711	11
BBCH 43-45	2021	KWS Irina	Mo	0.822	3.232	4.8	0.725	10.41
BBCH 43-45	2021	KWS Irina	Zn	0.82	3.662	5.12	0.733	11.052
BBCH 43-45	2021	KWS Irina	Zn	0.825	3.452	4.952	0.742	11.88
BBCH 43-45	2021	KWS Irina	Zn	0.833	3.8	4.881	0.702	12.51
BBCH 43-45	2021	KWS Irina	Zn	0.811	3.74	5.026	0.733	13.25
BBCH 43-45	2021	KWS Irina	Zn	0.812	3.512	4.845	0.744	13.025
BBCH 43-45	2021	KWS Irina	Zn	0.815	3.633	4.77	0.74	13.74
BBCH 43-45	2021	KWS Irina	Zn	0.823	3.412	4.932	0.73	12.151
BBCH 43-45	2021	KWS Irina	Zn	0.832	3.58	4.82	0.737	11.74
BBCH 43-45	2021	KWS Irina	Zn	0.822	3.95	4.71	0.729	11.65
BBCH 43-45	2021	KWS Irina	Zn	0.83	4.441	5.03	0.714	12.44
BBCH 43-45	2021	KWS Irina	Zn	0.829	4.252	5.041	0.732	12.41
BBCH 43-45	2021	KWS Irina	Zn	0.831	3.85	5.11	0.722	11.95
BBCH 43-45	2021	KWS Irina	Zn	0.832	4.11	5.212	0.731	11.77
BBCH 43-45	2021	KWS Irina	Zn	0.839	3.845	4.741	0.733	12.3
BBCH 43-45	2021	KWS Irina	Zn	0.835	3.445	4.994	0.714	11.78
BBCH 43-45	2021	KWS Irina	Zn	0.833	3.262	5.025	0.735	11.878
BBCH 43-45	2021	KWS Irina	Zn	0.84	3.742	5.062	0.733	12.62
BBCH 43-45	2021	KWS Irina	Zn	0.83	3.662	5.41	0.731	12.85
BBCH 43-45	2021	KWS Irina	Zn	0.84	3.741	5.332	0.728	12.47
BBCH 43-45	2021	KWS Irina	Zn	0.835	3.74	5.45	0.734	12.41
BBCH 43-45	2021	RGT Planet	control	0.798	2.992	4.21	0.702	9.14
BBCH 43-45	2021	RGT Planet	control	0.802	2.784	4.323	0.744	9.662
BBCH 43-45	2021	RGT Planet	control	0.806	2.88	4.42	0.744	9.421
BBCH 43-45	2021	RGT Planet	control	0.811	2.911	4.21	0.732	10.41
BBCH 43-45	2021	RGT Planet	control	0.821	3.221	4.05	0.725	11.52
BBCH 43-45	2021	RGT Planet	control	0.833	3.52	4.139	0.732	11.542
BBCH 43-45	2021	RGT Planet	control	0.821	3.11	4.282	0.711	11.452
BBCH 43-45	2021	RGT Planet	control	0.836	3.025	4.3	0.718	12.025
BBCH 43-45	2021	RGT Planet	control	0.822	3.11	4.441	0.721	10.41
BBCH 43-45	2021	RGT Planet	control	0.814	3.252	4.252	0.706	11.85
BBCH 43-45	2021	RGT Planet	control	0.807	3.41	4.56	0.724	12.552
BBCH 43-45	2021	RGT Planet	control	0.815	2.984	4.67	0.71	11.452
BBCH 43-45	2021	RGT Planet	control	0.805	2.9	4.821	0.721	11.62
BBCH 43-45	2021	RGT Planet	control	0.802	2.745	4.411	0.718	9.945
BBCH 43-45	2021	RGT Planet	control	0.811	2.82	4.252	0.706	9.552
BBCH 43-45	2021	RGT Planet	control	0.814	3.012	4.52	0.696	9.412
BBCH 43-45	2021	RGT Planet	control	0.822	2.99	4.41	0.72	9.774
BBCH 43-45	2021	RGT Planet	control	0.819	2.745	4.55	0.699	10.45
BBCH 43-45	2021	RGT Planet	control	0.822	2.88	4.62	0.702	11.666
BBCH 43-45	2021	RGT Planet	control	0.814	2.787	4.662	0.725	10.452
BBCH 43-45	2021	RGT Planet	Cu	0.833	2.885	4.665	0.66	11.12
BBCH 43-45	2021	RGT Planet	Cu	0.821	3.11	4.525	0.699	10.85
BBCH 43-45	2021	RGT Planet	Cu	0.818	3.212	4.442	0.701	12.25
BBCH 43-45	2021	RGT Planet	Cu	0.833	2.99	5.212	0.697	11.35
BBCH 43-45	2021	RGT Planet	Cu	0.825	2.88	5.225	0.678	10.54
BBCH 43-45	2021	RGT Planet	Cu	0.834	2.848	5.41	0.733	11.441
BBCH 43-45	2021	RGT Planet	Cu	0.833	3.11	5.02	0.725	10.544
BBCH 43-45	2021	RGT Planet	Cu	0.84	3.114	5.252	0.732	11.05
BBCH 43-45	2021	RGT Planet	Cu	0.825	2.88	5.33	0.725	10.54
BBCH 43-45	2021	RGT Planet	Cu	0.833	2.75	4.989	0.72	9.55
BBCH 43-45	2021	RGT Planet	Cu	0.845	3.2	4.75	0.688	9.457
BBCH 43-45	2021	RGT Planet	Cu	0.831	2.99	4.665	0.677	9.774
BBCH 43-45	2021	RGT Planet	Cu	0.833	3.14	4.75	0.685	9.898
BBCH 43-45	2021	RGT Planet	Cu	0.841	3.23	5.12	0.671	11.45
BBCH 43-45	2021	RGT Planet	Cu	0.832	3.552	5.002	0.68	11.626
BBCH 43-45	2021	RGT Planet	Cu	0.835	2.755	4.958	0.702	11.052
BBCH 43-45	2021	RGT Planet	Cu	0.841	2.84	4.74	0.711	12.41
BBCH 43-45	2021	RGT Planet	Cu	0.833	2.47	4.626	0.702	11.52
BBCH 43-45	2021	RGT Planet	Cu	0.825	2.885	5.002	0.685	11.41
BBCH 43-45	2021	RGT Planet	Cu	0.833	3.202	4.952	0.702	9.74
BBCH 43-45	2021	RGT Planet	Mn	0.822	3.11	4.75	0.699	11.12
BBCH 43-45	2021	RGT Planet	Mn	0.814	3.3	4.6	0.697	13.2
BBCH 43-45	2021	RGT Planet	Mn	0.832	2.74	4.82	0.69	11.48
BBCH 43-45	2021	RGT Planet	Mn	0.821	3.62	4.9	0.705	12.05
BBCH 43-45	2021	RGT Planet	Mn	0.811	3.22	4.55	0.723	9.4
BBCH 43-45	2021	RGT Planet	Mn	0.823	3.452	4.14	0.717	11.2
BBCH 43-45	2021	RGT Planet	Mn	0.825	3.36	3.89	0.714	8.45
BBCH 43-45	2021	RGT Planet	Mn	0.833	2.458	4.74	0.699	11.363
BBCH 43-45	2021	RGT Planet	Mn	0.814	2.5	5.08	0.705	11.454
BBCH 43-45	2021	RGT Planet	Mn	0.805	3.12	5.554	0.707	11.88
BBCH 43-45	2021	RGT Planet	Mn	0.827	3.33	5.36	0.699	11
BBCH 43-45	2021	RGT Planet	Mn	0.829	3.46	4.997	0.698	10.5
BBCH 43-45	2021	RGT Planet	Mn	0.83	2.994	4.91	0.701	10.75
BBCH 43-45	2021	RGT Planet	Mn	0.831	2.919	5.214	0.684	10.44
BBCH 43-45	2021	RGT Planet	Mn	0.821	3.221	5.44	0.711	11.62
BBCH 43-45	2021	RGT Planet	Mn	0.83	3.35	5.062	0.669	10.77
BBCH 43-45	2021	RGT Planet	Mn	0.835	2.884	4.887	0.685	10.75
BBCH 43-45	2021	RGT Planet	Mn	0.833	2.9	4.9	0.682	10.29
BBCH 43-45	2021	RGT Planet	Mn	0.844	3.25	5.44	0.68	10.5
BBCH 43-45	2021	RGT Planet	Mn	0.826	3.89	5.02	0.72	9.74
BBCH 43-45	2021	RGT Planet	Mo	0.834	3.825	5.121	0.74	11.62
BBCH 43-45	2021	RGT Planet	Mo	0.821	3.451	5.44	0.735	12.05
BBCH 43-45	2021	RGT Planet	Mo	0.83	3.69	4.2	0.741	11.74
BBCH 43-45	2021	RGT Planet	Mo	0.821	3.55	4.362	0.725	12.52
BBCH 43-45	2021	RGT Planet	Mo	0.834	3.774	4.991	0.739	13.082
BBCH 43-45	2021	RGT Planet	Mo	0.841	4.11	4.847	0.74	13.44
BBCH 43-45	2021	RGT Planet	Mo	0.84	3.98	4.62	0.745	12.95
BBCH 43-45	2021	RGT Planet	Mo	0.814	5.12	5.214	0.72	14.05
BBCH 43-45	2021	RGT Planet	Mo	0.835	4.441	5.32	0.719	14.52
BBCH 43-45	2021	RGT Planet	Mo	0.833	5.362	5.441	0.745	15.47
BBCH 43-45	2021	RGT Planet	Mo	0.829	3.85	5.68	0.761	15.66
BBCH 43-45	2021	RGT Planet	Mo	0.825	4.251	5.7	0.742	12
BBCH 43-45	2021	RGT Planet	Mo	0.835	4.3	5.41	0.76	14.25
BBCH 43-45	2021	RGT Planet	Mo	0.825	5.236	4.999	0.758	12.992
BBCH 43-45	2021	RGT Planet	Mo	0.837	4.152	5.621	0.749	13.412
BBCH 43-45	2021	RGT Planet	Mo	0.833	4.52	5.7	0.741	13.5
BBCH 43-45	2021	RGT Planet	Mo	0.839	3.665	5.452	0.739	12.74
BBCH 43-45	2021	RGT Planet	Mo	0.837	3.15	5.332	0.74	12.662
BBCH 43-45	2021	RGT Planet	Mo	0.835	4.215	5.465	0.732	13.147
BBCH 43-45	2021	RGT Planet	Mo	0.847	3.118	5.541	0.748	13.025
BBCH 43-45	2021	RGT Planet	Zn	0.83	3.025	4.828	0.701	10.125
BBCH 43-45	2021	RGT Planet	Zn	0.827	3.11	5.026	0.699	11.412
BBCH 43-45	2021	RGT Planet	Zn	0.83	2.884	5.111	0.685	10.363
BBCH 43-45	2021	RGT Planet	Zn	0.841	2.678	5.036	0.688	10.84
BBCH 43-45	2021	RGT Planet	Zn	0.832	3.44	4.992	0.69	10.471
BBCH 43-45	2021	RGT Planet	Zn	0.825	3.51	4.85	0.694	11.062
BBCH 43-45	2021	RGT Planet	Zn	0.83	3.52	4.772	0.697	11.189
BBCH 43-45	2021	RGT Planet	Zn	0.828	2.995	5.302	0.687	12.028
BBCH 43-45	2021	RGT Planet	Zn	0.82	2.789	5.125	0.701	12.56
BBCH 43-45	2021	RGT Planet	Zn	0.825	3.52	5.02	0.702	11.412
BBCH 43-45	2021	RGT Planet	Zn	0.813	3.212	4.661	0.714	11.952
BBCH 43-45	2021	RGT Planet	Zn	0.825	3.412	4.85	0.691	12.412
BBCH 43-45	2021	RGT Planet	Zn	0.833	3.152	5.362	0.699	12.441
BBCH 43-45	2021	RGT Planet	Zn	0.829	3.441	4.699	0.7	11.623
BBCH 43-45	2021	RGT Planet	Zn	0.834	3.23	5.008	0.703	11.052
BBCH 43-45	2021	RGT Planet	Zn	0.833	3.192	5.141	0.701	10.41
BBCH 43-45	2021	RGT Planet	Zn	0.835	3.05	4.66	0.714	10.995
BBCH 43-45	2021	RGT Planet	Zn	0.848	3.52	4.85	0.691	11.036
BBCH 43-45	2021	RGT Planet	Zn	0.825	3.52	4.797	0.702	10.412
BBCH 43-45	2021	RGT Planet	Zn	0.831	2.446	5.036	0.7	10.005
BBCH 50-52	2019	Baryłka	control	0.792	2.37	4.221	0.57	6.298
BBCH 50-52	2019	Baryłka	control	0.811	2.756	5.006	0.68	9.387
BBCH 50-52	2019	Baryłka	control	0.786	2.979	4.993	0.694	7.324
BBCH 50-52	2019	Baryłka	control	0.795	2.298	4.15	0.617	7.297
BBCH 50-52	2019	Baryłka	control	0.8	2.692	4.454	0.697	8.362
BBCH 50-52	2019	Baryłka	control	0.795	2.87	4.55	0.66	8.014
BBCH 50-52	2019	Baryłka	control	0.788	2.43	4.23	0.69	7.655
BBCH 50-52	2019	Baryłka	control	0.79	2.2	4.65	0.678	7.744
BBCH 50-52	2019	Baryłka	control	0.798	2.14	4.36	0.622	7.521
BBCH 50-52	2019	Baryłka	control	0.799	2.23	4.55	0.589	7.891
BBCH 50-52	2019	Baryłka	control	0.801	2.4	3.25	0.599	8.365
BBCH 50-52	2019	Baryłka	control	0.789	2.11	3.88	0.578	7.775
BBCH 50-52	2019	Baryłka	control	0.788	2.23	3.63	0.622	7.456
BBCH 50-52	2019	Baryłka	control	0.802	2.19	4.23	0.635	7.366
BBCH 50-52	2019	Baryłka	control	0.802	2.33	4.55	0.598	7.214
BBCH 50-52	2019	Baryłka	control	0.796	2.25	4.46	0.644	6.987
BBCH 50-52	2019	Baryłka	control	0.799	2.36	4.63	0.678	7.011
BBCH 50-52	2019	Baryłka	control	0.794	2.11	4.22	0.688	8.575
BBCH 50-52	2019	Baryłka	control	0.799	2.55	4.67	0.674	8.445
BBCH 50-52	2019	Baryłka	control	0.796	2.36	4.55	0.665	7.874
BBCH 50-52	2019	Baryłka	Cu	0.812	3.56	4.604	0.73	9.254
BBCH 50-52	2019	Baryłka	Cu	0.801	1.721	3.896	0.615	8.123
BBCH 50-52	2019	Baryłka	Cu	0.817	3.034	4.791	0.693	9.07
BBCH 50-52	2019	Baryłka	Cu	0.812	3.593	4.626	0.735	8.253
BBCH 50-52	2019	Baryłka	Cu	0.806	0.959	3.213	0.522	8.608
BBCH 50-52	2019	Baryłka	Cu	0.801	2.569	4.891	0.659	8.275
BBCH 50-52	2019	Baryłka	Cu	0.815	3.03	4.656	0.699	9.866
BBCH 50-52	2019	Baryłka	Cu	0.795	1.728	4.176	0.607	7.378
BBCH 50-52	2019	Baryłka	Cu	0.804	2.938	4.738	0.696	9.694
BBCH 50-52	2019	Baryłka	Cu	0.811	3.469	4.807	0.728	8.254
BBCH 50-52	2019	Baryłka	Cu	0.817	2.901	4.789	0.679	9.429
BBCH 50-52	2019	Baryłka	Cu	0.828	3.244	4.798	0.709	9.042
BBCH 50-52	2019	Baryłka	Cu	0.811	3.127	4.459	0.714	9.957
BBCH 50-52	2019	Baryłka	Cu	0.831	3.672	4.918	0.733	8.254
BBCH 50-52	2019	Baryłka	Cu	0.828	3.256	4.801	0.712	9.12
BBCH 50-52	2019	Baryłka	Cu	0.818	2.291	4.496	0.635	9.537
BBCH 50-52	2019	Baryłka	Cu	0.832	2.963	4.947	0.698	9.226
BBCH 50-52	2019	Baryłka	Cu	0.816	1.795	4.146	0.611	9.245
BBCH 50-52	2019	Baryłka	Cu	0.812	3.316	4.805	0.719	9.454
BBCH 50-52	2019	Baryłka	Cu	0.811	3.248	4.892	0.702	9.421
BBCH 50-52	2019	Baryłka	Mn	0.819	2.497	3.509	0.694	10.452
BBCH 50-52	2019	Baryłka	Mn	0.82	2.505	4.268	0.664	10.104
BBCH 50-52	2019	Baryłka	Mn	0.815	2.665	4.358	0.682	9.921
BBCH 50-52	2019	Baryłka	Mn	0.823	3.281	4.78	0.702	10.05
BBCH 50-52	2019	Baryłka	Mn	0.817	3.235	4.462	0.71	10.251
BBCH 50-52	2019	Baryłka	Mn	0.82	4.252	4.902	0.766	9.958
BBCH 50-52	2019	Baryłka	Mn	0.822	3.078	4.633	0.705	9.061
BBCH 50-52	2019	Baryłka	Mn	0.82	3.142	4.8	0.717	10.807
BBCH 50-52	2019	Baryłka	Mn	0.821	2.855	4.741	0.68	10.199
BBCH 50-52	2019	Baryłka	Mn	0.815	3.807	4.408	0.753	9.64
BBCH 50-52	2019	Baryłka	Mn	0.828	3.196	4.825	0.702	9.824
BBCH 50-52	2019	Baryłka	Mn	0.818	2.18	4.498	0.635	10.223
BBCH 50-52	2019	Baryłka	Mn	0.821	3.923	4.902	0.754	10.493
BBCH 50-52	2019	Baryłka	Mn	0.815	2.95	4.724	0.707	9.858
BBCH 50-52	2019	Baryłka	Mn	0.815	3.746	4.964	0.731	10.599
BBCH 50-52	2019	Baryłka	Mn	0.811	4.551	5.029	0.768	10.586
BBCH 50-52	2019	Baryłka	Mn	0.827	3.484	4.775	0.73	10.136
BBCH 50-52	2019	Baryłka	Mn	0.822	2.979	4.62	0.699	9.612
BBCH 50-52	2019	Baryłka	Mn	0.856	3.115	4.87	0.706	10.716
BBCH 50-52	2019	Baryłka	Mn	0.825	3.689	4.813	0.745	10.228
BBCH 50-52	2019	Baryłka	Mo	0.816	3.59	4.163	0.725	9.833
BBCH 50-52	2019	Baryłka	Mo	0.794	2.793	3.635	0.683	8.931
BBCH 50-52	2019	Baryłka	Mo	0.817	2.305	4.477	0.658	8.792
BBCH 50-52	2019	Baryłka	Mo	0.821	3.486	4.593	0.722	9.551
BBCH 50-52	2019	Baryłka	Mo	0.818	3.392	4.814	0.716	9.694
BBCH 50-52	2019	Baryłka	Mo	0.825	2.462	4.7	0.657	7.599
BBCH 50-52	2019	Baryłka	Mo	0.814	3.87	3.904	0.725	9.944
BBCH 50-52	2019	Baryłka	Mo	0.821	3.494	4.595	0.725	10.636
BBCH 50-52	2019	Baryłka	Mo	0.796	3.536	3.892	0.714	9.821
BBCH 50-52	2019	Baryłka	Mo	0.815	2.83	4.414	0.673	8.411
BBCH 50-52	2019	Baryłka	Mo	0.805	2.639	4.857	0.675	8.65
BBCH 50-52	2019	Baryłka	Mo	0.834	3.412	5.015	0.729	10.478
BBCH 50-52	2019	Baryłka	Mo	0.826	3.198	4.762	0.695	9.586
BBCH 50-52	2019	Baryłka	Mo	0.827	2.973	4.778	0.705	10.016
BBCH 50-52	2019	Baryłka	Mo	0.826	3.404	4.76	0.716	9.597
BBCH 50-52	2019	Baryłka	Mo	0.826	3.238	4.735	0.7	10.727
BBCH 50-52	2019	Baryłka	Mo	0.827	2.958	4.795	0.7	9.926
BBCH 50-52	2019	Baryłka	Mo	0.833	3.861	4.97	0.742	10.229
BBCH 50-52	2019	Baryłka	Mo	0.83	1.952	4.875	0.603	9.738
BBCH 50-52	2019	Baryłka	Mo	0.824	3.417	4.673	0.732	9.687
BBCH 50-52	2019	Baryłka	Zn	0.824	2.114	4.678	0.632	8.251
BBCH 50-52	2019	Baryłka	Zn	0.825	3.039	4.724	0.704	10.114
BBCH 50-52	2019	Baryłka	Zn	0.825	3.683	5.06	0.73	10.605
BBCH 50-52	2019	Baryłka	Zn	0.825	3.791	4.718	0.733	9.115
BBCH 50-52	2019	Baryłka	Zn	0.83	3.901	4.888	0.741	10.127
BBCH 50-52	2019	Baryłka	Zn	0.813	2.784	4.634	0.67	8.644
BBCH 50-52	2019	Baryłka	Zn	0.823	2.055	4.664	0.603	9.782
BBCH 50-52	2019	Baryłka	Zn	0.83	3.033	4.884	0.697	10.328
BBCH 50-52	2019	Baryłka	Zn	0.824	2.217	4.671	0.633	7.558
BBCH 50-52	2019	Baryłka	Zn	0.834	3.476	5.006	0.721	9.553
BBCH 50-52	2019	Baryłka	Zn	0.823	3.084	4.655	0.726	9.417
BBCH 50-52	2019	Baryłka	Zn	0.826	3.013	4.75	0.707	10.12
BBCH 50-52	2019	Baryłka	Zn	0.82	3.407	4.544	0.728	10.278
BBCH 50-52	2019	Baryłka	Zn	0.824	3.131	4.676	0.708	10.359
BBCH 50-52	2019	Baryłka	Zn	0.822	3.413	4.631	0.715	9.297
BBCH 50-52	2019	Baryłka	Zn	0.826	3.417	4.736	0.725	9.733
BBCH 50-52	2019	Baryłka	Zn	0.813	2.096	4.875	0.616	8.295
BBCH 50-52	2019	Baryłka	Zn	0.828	2.309	4.805	0.667	8.399
BBCH 50-52	2019	Baryłka	Zn	0.817	3.589	4.469	0.739	8.849
BBCH 50-52	2019	Baryłka	Zn	0.819	3.196	4.86	0.721	9.197
BBCH 50-52	2019	KWS Irina	control	0.799	2.441	5.209	0.659	8.379
BBCH 50-52	2019	KWS Irina	control	0.809	3.152	5.218	0.695	7.439
BBCH 50-52	2019	KWS Irina	control	0.789	2.211	5.024	0.643	7.146
BBCH 50-52	2019	KWS Irina	control	0.801	1.716	4.756	0.578	7.715
BBCH 50-52	2019	KWS Irina	control	0.829	2.884	4.849	0.683	9.55
BBCH 50-52	2019	KWS Irina	control	0.789	1.847	4.987	0.645	8.05
BBCH 50-52	2019	KWS Irina	control	0.799	1.865	4.888	0.666	8.11
BBCH 50-52	2019	KWS Irina	control	0.802	2.255	4.795	0.674	7.98
BBCH 50-52	2019	KWS Irina	control	0.811	2.11	5.121	0.687	7.97
BBCH 50-52	2019	KWS Irina	control	0.785	2.354	5.22	0.654	7.67
BBCH 50-52	2019	KWS Irina	control	0.766	2.654	4.741	0.644	8.23
BBCH 50-52	2019	KWS Irina	control	0.759	2.451	4.622	0.599	8.75
BBCH 50-52	2019	KWS Irina	control	0.811	2.81	5.01	0.623	8.22
BBCH 50-52	2019	KWS Irina	control	0.801	1.978	5.111	0.633	8.11
BBCH 50-52	2019	KWS Irina	control	0.795	2.345	5.233	0.678	7.94
BBCH 50-52	2019	KWS Irina	control	0.813	2.654	5.145	0.677	7.02
BBCH 50-52	2019	KWS Irina	control	0.802	2.77	4.784	0.599	8.34
BBCH 50-52	2019	KWS Irina	control	0.822	3.011	5.112	0.587	7.65
BBCH 50-52	2019	KWS Irina	control	0.799	2.984	5.214	0.602	8.11
BBCH 50-52	2019	KWS Irina	control	0.814	2.777	5.001	0.656	8.56
BBCH 50-52	2019	KWS Irina	Cu	0.823	2.697	4.884	0.658	9.665
BBCH 50-52	2019	KWS Irina	Cu	0.816	3.985	5.095	0.751	10.243
BBCH 50-52	2019	KWS Irina	Cu	0.828	2.306	4.829	0.66	7.345
BBCH 50-52	2019	KWS Irina	Cu	0.83	2.742	4.873	0.663	8.858
BBCH 50-52	2019	KWS Irina	Cu	0.823	1.977	4.648	0.63	8.789
BBCH 50-52	2019	KWS Irina	Cu	0.813	3.017	4.992	0.681	10.259
BBCH 50-52	2019	KWS Irina	Cu	0.829	2.543	4.848	0.659	8.12
BBCH 50-52	2019	KWS Irina	Cu	0.835	1.863	5.077	0.62	8.869
BBCH 50-52	2019	KWS Irina	Cu	0.812	2.238	4.329	0.652	8.319
BBCH 50-52	2019	KWS Irina	Cu	0.83	3.103	4.895	0.69	10.485
BBCH 50-52	2019	KWS Irina	Cu	0.825	2.57	4.711	0.676	8.18
BBCH 50-52	2019	KWS Irina	Cu	0.838	2.815	5.173	0.687	10.011
BBCH 50-52	2019	KWS Irina	Cu	0.833	3.365	4.997	0.705	8.856
BBCH 50-52	2019	KWS Irina	Cu	0.83	2.665	4.873	0.679	10.82
BBCH 50-52	2019	KWS Irina	Cu	0.834	2.766	5.033	0.67	9.331
BBCH 50-52	2019	KWS Irina	Cu	0.83	1.996	4.87	0.6	9.833
BBCH 50-52	2019	KWS Irina	Cu	0.84	2.792	5.257	0.674	9.89
BBCH 50-52	2019	KWS Irina	Cu	0.83	2.49	4.895	0.669	8.158
BBCH 50-52	2019	KWS Irina	Cu	0.839	3.621	5.209	0.728	9.729
BBCH 50-52	2019	KWS Irina	Cu	0.819	2.511	4.861	0.665	8.121
BBCH 50-52	2019	KWS Irina	Mn	0.818	2.248	4.499	0.655	8.622
BBCH 50-52	2019	KWS Irina	Mn	0.792	2.643	3.817	0.661	8.667
BBCH 50-52	2019	KWS Irina	Mn	0.78	1.935	3.554	0.648	7.453
BBCH 50-52	2019	KWS Irina	Mn	0.83	3.4	4.879	0.721	8.962
BBCH 50-52	2019	KWS Irina	Mn	0.827	3.029	4.785	0.687	9.955
BBCH 50-52	2019	KWS Irina	Mn	0.824	1.864	4.689	0.62	8.414
BBCH 50-52	2019	KWS Irina	Mn	0.829	1.791	4.853	0.605	7.26
BBCH 50-52	2019	KWS Irina	Mn	0.826	3.05	4.746	0.7	10.136
BBCH 50-52	2019	KWS Irina	Mn	0.838	2.939	5.178	0.685	10.419
BBCH 50-52	2019	KWS Irina	Mn	0.821	2.847	4.588	0.683	8.916
BBCH 50-52	2019	KWS Irina	Mn	0.833	3.083	4.978	0.692	10.616
BBCH 50-52	2019	KWS Irina	Mn	0.822	3.463	4.627	0.765	9.258
BBCH 50-52	2019	KWS Irina	Mn	0.812	3.687	3.208	0.828	9.798
BBCH 50-52	2019	KWS Irina	Mn	0.83	2.624	4.886	0.674	8.648
BBCH 50-52	2019	KWS Irina	Mn	0.837	3.477	5.123	0.733	10.057
BBCH 50-52	2019	KWS Irina	Mn	0.834	2.898	5.022	0.685	9.966
BBCH 50-52	2019	KWS Irina	Mn	0.831	2.302	4.917	0.669	7.573
BBCH 50-52	2019	KWS Irina	Mn	0.809	2.278	4.24	0.648	6.264
BBCH 50-52	2019	KWS Irina	Mn	0.832	2.285	4.951	0.658	7.449
BBCH 50-52	2019	KWS Irina	Mn	0.828	1.686	4.8	0.606	7.901
BBCH 50-52	2019	KWS Irina	Mo	0.827	2.603	4.795	0.666	8.307
BBCH 50-52	2019	KWS Irina	Mo	0.834	2.858	5.031	0.671	9.646
BBCH 50-52	2019	KWS Irina	Mo	0.837	2.858	5.13	0.673	9.873
BBCH 50-52	2019	KWS Irina	Mo	0.827	1.862	4.797	0.629	5.617
BBCH 50-52	2019	KWS Irina	Mo	0.836	2.883	5.079	0.686	10.046
BBCH 50-52	2019	KWS Irina	Mo	0.833	2.726	4.992	0.686	9.338
BBCH 50-52	2019	KWS Irina	Mo	0.834	2.792	5.018	0.684	9.582
BBCH 50-52	2019	KWS Irina	Mo	0.835	2.704	5.068	0.677	9.275
BBCH 50-52	2019	KWS Irina	Mo	0.837	2.718	5.146	0.687	9.609
BBCH 50-52	2019	KWS Irina	Mo	0.833	3.565	4.996	0.72	10.824
BBCH 50-52	2019	KWS Irina	Mo	0.838	3.441	5.19	0.725	9.954
BBCH 50-52	2019	KWS Irina	Mo	0.835	2.819	5.055	0.682	9.713
BBCH 50-52	2019	KWS Irina	Mo	0.839	3.516	5.229	0.726	10.342
BBCH 50-52	2019	KWS Irina	Mo	0.819	2.779	5.205	0.675	9.763
BBCH 50-52	2019	KWS Irina	Mo	0.838	2.97	5.178	0.707	10.873
BBCH 50-52	2019	KWS Irina	Mo	0.818	1.908	5.164	0.61	9.005
BBCH 50-52	2019	KWS Irina	Mo	0.816	1.854	4.443	0.596	9.91
BBCH 50-52	2019	KWS Irina	Mo	0.823	2.836	4.999	0.678	9.614
BBCH 50-52	2019	KWS Irina	Mo	0.835	3.088	5.067	0.704	11.02
BBCH 50-52	2019	KWS Irina	Mo	0.823	2.95	4.642	0.704	9.643
BBCH 50-52	2019	KWS Irina	Zn	0.827	3.434	4.77	0.714	9.692
BBCH 50-52	2019	KWS Irina	Zn	0.831	3.163	4.923	0.705	10.972
BBCH 50-52	2019	KWS Irina	Zn	0.819	2.079	4.533	0.632	7.958
BBCH 50-52	2019	KWS Irina	Zn	0.819	2.538	4.539	0.665	7.659
BBCH 50-52	2019	KWS Irina	Zn	0.835	3.201	5.046	0.71	9.474
BBCH 50-52	2019	KWS Irina	Zn	0.831	2.421	4.905	0.643	7.638
BBCH 50-52	2019	KWS Irina	Zn	0.828	2.692	4.821	0.671	8.71
BBCH 50-52	2019	KWS Irina	Zn	0.835	2.769	5.075	0.684	9.61
BBCH 50-52	2019	KWS Irina	Zn	0.812	2.512	4.958	0.669	8.333
BBCH 50-52	2019	KWS Irina	Zn	0.825	2.377	4.714	0.634	9.11
BBCH 50-52	2019	KWS Irina	Zn	0.834	3.038	5.04	0.713	10.923
BBCH 50-52	2019	KWS Irina	Zn	0.833	2.905	5.002	0.689	10.013
BBCH 50-52	2019	KWS Irina	Zn	0.83	3.076	4.884	0.696	10.45
BBCH 50-52	2019	KWS Irina	Zn	0.801	2.116	4.771	0.65	7.567
BBCH 50-52	2019	KWS Irina	Zn	0.809	2.167	4.464	0.635	7.147
BBCH 50-52	2019	KWS Irina	Zn	0.835	2.887	5.051	0.695	10.144
BBCH 50-52	2019	KWS Irina	Zn	0.841	2.462	5.306	0.641	8.374
BBCH 50-52	2019	KWS Irina	Zn	0.839	2.939	5.21	0.701	10.736
BBCH 50-52	2019	KWS Irina	Zn	0.814	1.404	4.678	0.519	7.409
BBCH 50-52	2019	KWS Irina	Zn	0.839	4.009	5.201	0.754	11.713
BBCH 50-52	2019	RGT Planet	control	0.826	1.97	4.739	0.631	5.894
BBCH 50-52	2019	RGT Planet	control	0.834	2.514	5.007	0.668	8.412
BBCH 50-52	2019	RGT Planet	control	0.833	2.802	5.005	0.689	9.666
BBCH 50-52	2019	RGT Planet	control	0.835	2.422	5.059	0.678	8.304
BBCH 50-52	2019	RGT Planet	control	0.834	2.312	5.007	0.639	7.403
BBCH 50-52	2019	RGT Planet	control	0.833	2.574	4.457	0.678	8.214
BBCH 50-52	2019	RGT Planet	control	0.7987	2.456	4.652	0.662	8.766
BBCH 50-52	2019	RGT Planet	control	0.788	2.231	5.214	0.733	8.464
BBCH 50-52	2019	RGT Planet	control	0.801	3.845	5.114	0.714	7.452
BBCH 50-52	2019	RGT Planet	control	0.8	2.455	4.981	0.698	7.412
BBCH 50-52	2019	RGT Planet	control	0.765	2.641	5.231	0.633	6.988
BBCH 50-52	2019	RGT Planet	control	0.795	3.112	5.332	0.624	7.877
BBCH 50-52	2019	RGT Planet	control	0.766	1.987	4.998	0.663	8.002
BBCH 50-52	2019	RGT Planet	control	0.855	1.944	4.745	0.545	7.945
BBCH 50-52	2019	RGT Planet	control	0.831	2.145	4.966	0.711	8.654
BBCH 50-52	2019	RGT Planet	control	0.824	2.653	4.774	0.633	8.474
BBCH 50-52	2019	RGT Planet	control	0.814	2.465	3.897	0.642	7.552
BBCH 50-52	2019	RGT Planet	control	0.822	1.977	3.999	0.614	8.145
BBCH 50-52	2019	RGT Planet	control	0.814	2.145	4.652	0.678	8.365
BBCH 50-52	2019	RGT Planet	control	0.822	1.874	4.447	0.699	7.566
BBCH 50-52	2019	RGT Planet	Cu	0.826	2.692	4.742	0.679	8.662
BBCH 50-52	2019	RGT Planet	Cu	0.838	2.325	5.162	0.658	8.897
BBCH 50-52	2019	RGT Planet	Cu	0.824	3.206	4.693	0.718	10.803
BBCH 50-52	2019	RGT Planet	Cu	0.835	2.976	5.079	0.709	10.714
BBCH 50-52	2019	RGT Planet	Cu	0.812	1.762	4.327	0.622	8.741
BBCH 50-52	2019	RGT Planet	Cu	0.833	3.138	4.994	0.711	11.137
BBCH 50-52	2019	RGT Planet	Cu	0.829	3.057	4.837	0.693	10.247
BBCH 50-52	2019	RGT Planet	Cu	0.822	2.741	4.607	0.683	9.624
BBCH 50-52	2019	RGT Planet	Cu	0.826	2.562	4.763	0.659	10.04
BBCH 50-52	2019	RGT Planet	Cu	0.828	3.017	4.818	0.692	10.054
BBCH 50-52	2019	RGT Planet	Cu	0.828	3.061	4.804	0.714	10.495
BBCH 50-52	2019	RGT Planet	Cu	0.83	2.5	4.888	0.665	8.13
BBCH 50-52	2019	RGT Planet	Cu	0.828	3.196	4.83	0.712	10.988
BBCH 50-52	2019	RGT Planet	Cu	0.826	2.605	4.75	0.689	9.528
BBCH 50-52	2019	RGT Planet	Cu	0.829	3.494	4.858	0.729	10.373
BBCH 50-52	2019	RGT Planet	Cu	0.812	2.065	4.329	0.632	8.653
BBCH 50-52	2019	RGT Planet	Cu	0.822	2.346	4.622	0.641	9.951
BBCH 50-52	2019	RGT Planet	Cu	0.83	2.301	4.898	0.651	8.333
BBCH 50-52	2019	RGT Planet	Cu	0.812	2.492	4.622	0.638	9.35
BBCH 50-52	2019	RGT Planet	Cu	0.823	2.819	4.642	0.696	9.102
BBCH 50-52	2019	RGT Planet	Mn	0.827	2.556	4.791	0.665	9.139
BBCH 50-52	2019	RGT Planet	Mn	0.832	2.781	4.938	0.704	9.667
BBCH 50-52	2019	RGT Planet	Mn	0.821	2.575	4.576	0.674	8.943
BBCH 50-52	2019	RGT Planet	Mn	0.827	3.067	4.779	0.697	10.215
BBCH 50-52	2019	RGT Planet	Mn	0.838	2.846	5.163	0.677	9.954
BBCH 50-52	2019	RGT Planet	Mn	0.83	2.459	4.892	0.658	9.909
BBCH 50-52	2019	RGT Planet	Mn	0.836	2.594	5.093	0.667	8.817
BBCH 50-52	2019	RGT Planet	Mn	0.832	3.376	4.945	0.724	10.094
BBCH 50-52	2019	RGT Planet	Mn	0.832	3.203	4.951	0.71	11.258
BBCH 50-52	2019	RGT Planet	Mn	0.829	3.231	4.843	0.718	11.233
BBCH 50-52	2019	RGT Planet	Mn	0.839	3.749	5.223	0.741	10.505
BBCH 50-52	2019	RGT Planet	Mn	0.832	2.775	4.944	0.667	9.143
BBCH 50-52	2019	RGT Planet	Mn	0.835	2.424	5.075	0.678	8.348
BBCH 50-52	2019	RGT Planet	Mn	0.826	2.54	4.748	0.681	8.215
BBCH 50-52	2019	RGT Planet	Mn	0.832	2.755	4.952	0.659	8.984
BBCH 50-52	2019	RGT Planet	Mn	0.816	2.376	4.429	0.671	8.055
BBCH 50-52	2019	RGT Planet	Mn	0.833	2.434	4.974	0.646	8.818
BBCH 50-52	2019	RGT Planet	Mn	0.842	2.554	5.345	0.676	9.221
BBCH 50-52	2019	RGT Planet	Mn	0.839	3.224	5.201	0.711	11.929
BBCH 50-52	2019	RGT Planet	Mn	0.82	2.83	4.562	0.695	8.976
BBCH 50-52	2019	RGT Planet	Mo	0.824	2.5	4.666	0.676	8.886
BBCH 50-52	2019	RGT Planet	Mo	0.831	2.706	4.928	0.693	9.244
BBCH 50-52	2019	RGT Planet	Mo	0.827	2.926	4.782	0.712	9.958
BBCH 50-52	2019	RGT Planet	Mo	0.831	3.135	4.924	0.713	11.004
BBCH 50-52	2019	RGT Planet	Mo	0.812	2.025	4.324	0.629	5.508
BBCH 50-52	2019	RGT Planet	Mo	0.832	3.532	4.962	0.714	10.516
BBCH 50-52	2019	RGT Planet	Mo	0.823	2.602	4.659	0.66	8.003
BBCH 50-52	2019	RGT Planet	Mo	0.832	3.147	4.935	0.711	11.046
BBCH 50-52	2019	RGT Planet	Mo	0.832	2.759	4.959	0.684	9.351
BBCH 50-52	2019	RGT Planet	Mo	0.825	3.165	4.729	0.694	10.391
BBCH 50-52	2019	RGT Planet	Mo	0.839	3.371	5.229	0.731	12.894
BBCH 50-52	2019	RGT Planet	Mo	0.826	3.668	4.756	0.737	10.855
BBCH 50-52	2019	RGT Planet	Mo	0.823	2.72	4.66	0.691	8.762
BBCH 50-52	2019	RGT Planet	Mo	0.836	3.445	5.097	0.732	9.859
BBCH 50-52	2019	RGT Planet	Mo	0.814	2.332	4.385	0.669	6.839
BBCH 50-52	2019	RGT Planet	Mo	0.824	2.922	4.685	0.705	9.649
BBCH 50-52	2019	RGT Planet	Mo	0.823	2.653	4.636	0.677	8.324
BBCH 50-52	2019	RGT Planet	Mo	0.815	1.661	4.416	0.584	8.282
BBCH 50-52	2019	RGT Planet	Mo	0.82	1.873	4.562	0.633	8.411
BBCH 50-52	2019	RGT Planet	Mo	0.822	3.142	4.626	0.714	10.381
BBCH 50-52	2019	RGT Planet	Zn	0.829	3.029	4.856	0.704	10.352
BBCH 50-52	2019	RGT Planet	Zn	0.817	2.753	4.462	0.677	10.32
BBCH 50-52	2019	RGT Planet	Zn	0.818	3.108	4.502	0.708	9.906
BBCH 50-52	2019	RGT Planet	Zn	0.814	1.817	4.368	0.604	9.792
BBCH 50-52	2019	RGT Planet	Zn	0.822	2.804	4.616	0.689	8.918
BBCH 50-52	2019	RGT Planet	Zn	0.831	3.28	4.921	0.726	11.723
BBCH 50-52	2019	RGT Planet	Zn	0.821	2.953	4.592	0.693	9.4
BBCH 50-52	2019	RGT Planet	Zn	0.829	3.059	4.838	0.697	10.318
BBCH 50-52	2019	RGT Planet	Zn	0.835	3.482	5.046	0.726	12.763
BBCH 50-52	2019	RGT Planet	Zn	0.825	2.864	4.706	0.694	9.35
BBCH 50-52	2019	RGT Planet	Zn	0.829	3.54	4.85	0.731	12.558
BBCH 50-52	2019	RGT Planet	Zn	0.836	3.783	5.102	0.746	11.402
BBCH 50-52	2019	RGT Planet	Zn	0.83	2.488	4.877	0.641	8.773
BBCH 50-52	2019	RGT Planet	Zn	0.831	2.997	4.926	0.704	10.393
BBCH 50-52	2019	RGT Planet	Zn	0.82	4.04	4.55	0.758	11.931
BBCH 50-52	2019	RGT Planet	Zn	0.839	2.644	5.202	0.692	9.517
BBCH 50-52	2019	RGT Planet	Zn	0.837	3.33	5.132	0.721	12.314
BBCH 50-52	2019	RGT Planet	Zn	0.833	3.177	4.997	0.717	11.378
BBCH 50-52	2019	RGT Planet	Zn	0.833	3.174	4.982	0.71	11.23
BBCH 50-52	2019	RGT Planet	Zn	0.833	3.59	4.975	0.73	10.033
BBCH 50-52	2020	Baryłka	control	0.78	2.52	4.528	0.707	6.617
BBCH 50-52	2020	Baryłka	control	0.79	2.521	4.529	0.708	6.618
BBCH 50-52	2020	Baryłka	control	0.788	2.522	4.53	0.709	6.619
BBCH 50-52	2020	Baryłka	control	0.798	2.723	4.531	0.71	6.62
BBCH 50-52	2020	Baryłka	control	0.801	2.524	4.532	0.711	6.621
BBCH 50-52	2020	Baryłka	control	0.802	3.212	3.985	0.711	6.66
BBCH 50-52	2020	Baryłka	control	0.796	3.412	4.215	0.702	7.14
BBCH 50-52	2020	Baryłka	control	0.799	3.321	4.751	0.714	7.235
BBCH 50-52	2020	Baryłka	control	0.812	3.252	4.236	0.698	8.111
BBCH 50-52	2020	Baryłka	control	0.798	2.654	4.652	0.669	6.457
BBCH 50-52	2020	Baryłka	control	0.821	3.11	5.11	0.715	6.988
BBCH 50-52	2020	Baryłka	control	0.778	2.331	5.024	0.699	6.457
BBCH 50-52	2020	Baryłka	control	0.832	2.114	4.785	0.714	5.14
BBCH 50-52	2020	Baryłka	control	0.822	1.987	4.445	0.722	7.145
BBCH 50-52	2020	Baryłka	control	0.799	2.12	4.652	0.694	6.365
BBCH 50-52	2020	Baryłka	control	0.798	2.878	4.325	0.695	7.023
BBCH 50-52	2020	Baryłka	control	0.788	1.775	4.006	0.702	6.77
BBCH 50-52	2020	Baryłka	control	0.787	1.678	4.445	0.705	5.771
BBCH 50-52	2020	Baryłka	control	0.755	2.142	5.021	0.711	5.661
BBCH 50-52	2020	Baryłka	control	0.745	2.365	4.388	0.699	6.024
BBCH 50-52	2020	Baryłka	Cu	0.798	3.142	5.032	0.688	8.565
BBCH 50-52	2020	Baryłka	Cu	0.799	2.989	4.985	0.802	8.453
BBCH 50-52	2020	Baryłka	Cu	0.814	2.742	4.799	0.725	9.42
BBCH 50-52	2020	Baryłka	Cu	0.821	2.145	3.985	0.728	8.466
BBCH 50-52	2020	Baryłka	Cu	0.792	3.142	3.656	0.776	9.656
BBCH 50-52	2020	Baryłka	Cu	0.799	2.874	4.124	0.744	9.98
BBCH 50-52	2020	Baryłka	Cu	0.822	2.552	4.253	0.652	8.975
BBCH 50-52	2020	Baryłka	Cu	0.833	3.111	5.141	0.666	9.998
BBCH 50-52	2020	Baryłka	Cu	0.822	2.595	3.965	0.735	10.559
BBCH 50-52	2020	Baryłka	Cu	0.819	2.879	4.532	0.714	9.316
BBCH 50-52	2020	Baryłka	Cu	0.821	2.821	4.785	0.719	9.711
BBCH 50-52	2020	Baryłka	Cu	0.807	3.024	4.183	0.704	8.908
BBCH 50-52	2020	Baryłka	Cu	0.809	2.888	4.249	0.708	8.69
BBCH 50-52	2020	Baryłka	Cu	0.831	3.383	4.914	0.746	10.408
BBCH 50-52	2020	Baryłka	Cu	0.814	3.189	4.092	0.747	9.741
BBCH 50-52	2020	Baryłka	Cu	0.809	2.845	4.237	0.707	8.526
BBCH 50-52	2020	Baryłka	Cu	0.818	2.161	4.48	0.671	9.501
BBCH 50-52	2020	Baryłka	Cu	0.792	2.101	3.802	0.677	8.404
BBCH 50-52	2020	Baryłka	Cu	0.83	2.596	4.879	0.704	8.91
BBCH 50-52	2020	Baryłka	Cu	0.85	4.051	5.672	0.775	11.811
BBCH 50-52	2020	Baryłka	Mn	0.822	2.854	4.385	0.714	10.01
BBCH 50-52	2020	Baryłka	Mn	0.812	3.11	4.245	0.755	9.898
BBCH 50-52	2020	Baryłka	Mn	0.822	3.231	4.658	0.709	10.25
BBCH 50-52	2020	Baryłka	Mn	0.814	2.888	3.985	0.733	9.44
BBCH 50-52	2020	Baryłka	Mn	0.817	2.765	4.222	0.735	9.277
BBCH 50-52	2020	Baryłka	Mn	0.809	2.655	4.363	0.696	9.012
BBCH 50-52	2020	Baryłka	Mn	0.798	3.411	4.785	0.711	8.985
BBCH 50-52	2020	Baryłka	Mn	0.813	2.744	4.54	0.721	9.155
BBCH 50-52	2020	Baryłka	Mn	0.817	3.093	4.171	0.73	9.416
BBCH 50-52	2020	Baryłka	Mn	0.812	2.625	4.311	0.688	9.786
BBCH 50-52	2020	Baryłka	Mn	0.831	3.407	4.915	0.754	10.62
BBCH 50-52	2020	Baryłka	Mn	0.822	3.63	4.616	0.755	10.647
BBCH 50-52	2020	Baryłka	Mn	0.816	2.774	4.753	0.705	9.288
BBCH 50-52	2020	Baryłka	Mn	0.831	2.819	4.904	0.725	10.022
BBCH 50-52	2020	Baryłka	Mn	0.814	2.252	4.366	0.665	8.543
BBCH 50-52	2020	Baryłka	Mn	0.802	2.627	4.056	0.706	7.523
BBCH 50-52	2020	Baryłka	Mn	0.774	2.369	3.426	0.764	7.201
BBCH 50-52	2020	Baryłka	Mn	0.824	3.244	4.37	0.748	10.601
BBCH 50-52	2020	Baryłka	Mn	0.805	2.424	4.134	0.684	8.852
BBCH 50-52	2020	Baryłka	Mn	0.828	3.19	4.812	0.736	11.294
BBCH 50-52	2020	Baryłka	Mo	0.824	3.022	3.988	0.698	9.574
BBCH 50-52	2020	Baryłka	Mo	0.811	3.986	4.256	0.711	10.12
BBCH 50-52	2020	Baryłka	Mo	0.805	2.974	4.443	0.765	9.452
BBCH 50-52	2020	Baryłka	Mo	0.802	2.777	3.452	0.735	8.998
BBCH 50-52	2020	Baryłka	Mo	0.814	3.25	3.835	0.72	10.123
BBCH 50-52	2020	Baryłka	Mo	0.822	3.455	4.356	0.714	9.124
BBCH 50-52	2020	Baryłka	Mo	0.826	3.023	4.252	0.742	9.87
BBCH 50-52	2020	Baryłka	Mo	0.818	2.9	4.652	0.765	10.111
BBCH 50-52	2020	Baryłka	Mo	0.821	3.246	4.287	0.737	10.259
BBCH 50-52	2020	Baryłka	Mo	0.818	3.069	4.493	0.714	9.846
BBCH 50-52	2020	Baryłka	Mo	0.805	2.914	4.136	0.725	8.74
BBCH 50-52	2020	Baryłka	Mo	0.826	3.964	4.741	0.772	10.499
BBCH 50-52	2020	Baryłka	Mo	0.821	3.555	4.588	0.744	10.139
BBCH 50-52	2020	Baryłka	Mo	0.816	2.495	4.424	0.709	9.828
BBCH 50-52	2020	Baryłka	Mo	0.801	3.001	4.017	0.718	8.653
BBCH 50-52	2020	Baryłka	Mo	0.812	1.76	2.87	0.697	9.52
BBCH 50-52	2020	Baryłka	Mo	0.814	2.638	3.902	0.712	9.331
BBCH 50-52	2020	Baryłka	Mo	0.824	2.981	4.667	0.722	10.044
BBCH 50-52	2020	Baryłka	Mo	0.788	1.158	2.204	0.75	8.914
BBCH 50-52	2020	Baryłka	Mo	0.824	4.315	5.42	0.778	10.186
BBCH 50-52	2020	Baryłka	Zn	0.819	3.222	4.888	0.696	10.01
BBCH 50-52	2020	Baryłka	Zn	0.821	2.985	4.656	0.711	8.777
BBCH 50-52	2020	Baryłka	Zn	0.802	3.331	5.001	0.721	11.02
BBCH 50-52	2020	Baryłka	Zn	0.814	2.988	4.777	0.745	9.258
BBCH 50-52	2020	Baryłka	Zn	0.822	2.784	3.989	0.696	9.487
BBCH 50-52	2020	Baryłka	Zn	0.809	2.99	3.945	0.733	10.23
BBCH 50-52	2020	Baryłka	Zn	0.828	3.012	4.212	0.717	10.34
BBCH 50-52	2020	Baryłka	Zn	0.839	2.907	4.856	0.709	11.02
BBCH 50-52	2020	Baryłka	Zn	0.821	3.29	4.588	0.732	11.05
BBCH 50-52	2020	Baryłka	Zn	0.813	2.709	4.349	0.695	9.193
BBCH 50-52	2020	Baryłka	Zn	0.815	2.932	4.415	0.719	9.313
BBCH 50-52	2020	Baryłka	Zn	0.828	3.593	4.81	0.749	10.94
BBCH 50-52	2020	Baryłka	Zn	0.817	3.117	4.467	0.732	10.188
BBCH 50-52	2020	Baryłka	Zn	0.822	2.597	4.612	0.69	8.271
BBCH 50-52	2020	Baryłka	Zn	0.808	3.396	4.218	0.758	10.857
BBCH 50-52	2020	Baryłka	Zn	0.807	3.009	4.179	0.713	8.961
BBCH 50-52	2020	Baryłka	Zn	0.819	3.018	4.529	0.717	9.796
BBCH 50-52	2020	Baryłka	Zn	0.833	3.149	5.002	0.731	11.519
BBCH 50-52	2020	Baryłka	Zn	0.831	2.924	4.924	0.72	10.368
BBCH 50-52	2020	Baryłka	Zn	0.819	2.378	5.218	0.682	9.463
BBCH 50-52	2020	KWS Irina	control	0.809	1.924	4.712	0.711	7.745
BBCH 50-52	2020	KWS Irina	control	0.807	2.025	4.254	0.658	7.354
BBCH 50-52	2020	KWS Irina	control	0.808	2.46	3.924	0.643	8.021
BBCH 50-52	2020	KWS Irina	control	0.789	2.84	4.015	0.632	6.541
BBCH 50-52	2020	KWS Irina	control	0.808	3.289	4.829	0.726	8.546
BBCH 50-52	2020	KWS Irina	control	0.802	2.541	3.878	0.711	7.252
BBCH 50-52	2020	KWS Irina	control	0.799	1.99	3.925	0.696	7.485
BBCH 50-52	2020	KWS Irina	control	0.802	2.241	3.231	0.686	6.447
BBCH 50-52	2020	KWS Irina	control	0.805	2.325	3.124	0.702	7.11
BBCH 50-52	2020	KWS Irina	control	0.788	2.64	3.414	0.7	8.212
BBCH 50-52	2020	KWS Irina	control	0.811	2.666	4.111	0.687	7.656
BBCH 50-52	2020	KWS Irina	control	0.822	2.457	3.989	0.722	8.02
BBCH 50-52	2020	KWS Irina	control	0.801	2.77	3.947	0.688	7.16
BBCH 50-52	2020	KWS Irina	control	0.797	2.686	3.212	0.674	7.99
BBCH 50-52	2020	KWS Irina	control	0.802	1.978	4.142	0.645	8.212
BBCH 50-52	2020	KWS Irina	control	0.814	2.331	4.323	0.632	8.155
BBCH 50-52	2020	KWS Irina	control	0.777	2.452	4.11	0.645	7.778
BBCH 50-52	2020	KWS Irina	control	0.787	2.441	4.212	0.633	7.625
BBCH 50-52	2020	KWS Irina	control	0.766	1.978	4.551	0.654	8.366
BBCH 50-52	2020	KWS Irina	control	0.799	2.444	4.656	0.673	7.254
BBCH 50-52	2020	KWS Irina	Cu	0.797	2.252	4.524	0.711	10.02
BBCH 50-52	2020	KWS Irina	Cu	0.823	3.331	4.323	0.721	9.254
BBCH 50-52	2020	KWS Irina	Cu	0.778	2.878	3.785	0.699	8.541
BBCH 50-52	2020	KWS Irina	Cu	0.825	3.245	4.111	0.694	9.252
BBCH 50-52	2020	KWS Irina	Cu	0.745	2.656	4.989	0.652	9.447
BBCH 50-52	2020	KWS Irina	Cu	0.8	2.555	4.365	0.644	9.302
BBCH 50-52	2020	KWS Irina	Cu	0.765	2.141	4.585	0.686	9.48
BBCH 50-52	2020	KWS Irina	Cu	0.832	2.02	4.62	0.68	9.111
BBCH 50-52	2020	KWS Irina	Cu	0.804	2.341	4.109	0.674	8.483
BBCH 50-52	2020	KWS Irina	Cu	0.817	2.436	4.188	0.69	8.043
BBCH 50-52	2020	KWS Irina	Cu	0.811	2.115	4.59	0.642	8.234
BBCH 50-52	2020	KWS Irina	Cu	0.82	3.561	4.567	0.738	10.997
BBCH 50-52	2020	KWS Irina	Cu	0.811	2.724	4.299	0.691	8.095
BBCH 50-52	2020	KWS Irina	Cu	0.821	3.04	4.583	0.722	10.06
BBCH 50-52	2020	KWS Irina	Cu	0.816	2.104	4.43	0.641	9.421
BBCH 50-52	2020	KWS Irina	Cu	0.819	2.262	4.517	0.658	9.726
BBCH 50-52	2020	KWS Irina	Cu	0.813	1.918	4.357	0.625	9.452
BBCH 50-52	2020	KWS Irina	Cu	0.809	3.154	4.242	0.735	9.835
BBCH 50-52	2020	KWS Irina	Cu	0.812	2.811	4.314	0.685	9.308
BBCH 50-52	2020	KWS Irina	Cu	0.824	3.185	4.681	0.74	10.029
BBCH 50-52	2020	KWS Irina	Mn	0.788	2.99	4.622	0.702	10.25
BBCH 50-52	2020	KWS Irina	Mn	0.822	2.475	4.222	0.696	9.25
BBCH 50-52	2020	KWS Irina	Mn	0.811	2.222	4.285	0.649	8.789
BBCH 50-52	2020	KWS Irina	Mn	0.819	2.323	3.99	0.699	8.325
BBCH 50-52	2020	KWS Irina	Mn	0.822	3.12	3.722	0.641	8.441
BBCH 50-52	2020	KWS Irina	Mn	0.803	3.01	4.554	0.642	8.32
BBCH 50-52	2020	KWS Irina	Mn	0.81	2.66	4.22	0.702	8.466
BBCH 50-52	2020	KWS Irina	Mn	0.811	2.677	4.771	0.713	8.251
BBCH 50-52	2020	KWS Irina	Mn	0.824	3.061	4.684	0.726	8.409
BBCH 50-52	2020	KWS Irina	Mn	0.824	2.816	4.686	0.71	10.374
BBCH 50-52	2020	KWS Irina	Mn	0.812	2.3	4.318	0.662	9.58
BBCH 50-52	2020	KWS Irina	Mn	0.807	3.679	4.176	0.76	9.673
BBCH 50-52	2020	KWS Irina	Mn	0.81	3.312	4.275	0.73	10.336
BBCH 50-52	2020	KWS Irina	Mn	0.789	2.019	3.749	0.624	7.728
BBCH 50-52	2020	KWS Irina	Mn	0.821	2.834	4.58	0.688	8.93
BBCH 50-52	2020	KWS Irina	Mn	0.804	2.045	4.102	0.632	7.307
BBCH 50-52	2020	KWS Irina	Mn	0.798	1.848	3.962	0.636	7.655
BBCH 50-52	2020	KWS Irina	Mn	0.813	3.086	4.641	0.728	8.423
BBCH 50-52	2020	KWS Irina	Mn	0.807	2.068	3.933	0.648	8.271
BBCH 50-52	2020	KWS Irina	Mn	0.812	3.172	4.57	0.719	8.42
BBCH 50-52	2020	KWS Irina	Mo	0.767	2.99	4.22	0.721	7.411
BBCH 50-52	2020	KWS Irina	Mo	0.822	3.12	4.323	0.696	7.71
BBCH 50-52	2020	KWS Irina	Mo	0.814	3.45	3.994	0.711	8.332
BBCH 50-52	2020	KWS Irina	Mo	0.775	2.141	4.002	0.7	8.41
BBCH 50-52	2020	KWS Irina	Mo	0.795	2.25	4.15	0.711	8.332
BBCH 50-52	2020	KWS Irina	Mo	0.811	2.441	4.25	0.685	8.45
BBCH 50-52	2020	KWS Irina	Mo	0.813	2.88	4.039	0.721	8.66
BBCH 50-52	2020	KWS Irina	Mo	0.82	3.02	4.22	0.701	9.25
BBCH 50-52	2020	KWS Irina	Mo	0.765	2.217	3.25	0.756	7.449
BBCH 50-52	2020	KWS Irina	Mo	0.799	2.768	3.977	0.713	7.843
BBCH 50-52	2020	KWS Irina	Mo	0.81	2.907	4.261	0.709	8.784
BBCH 50-52	2020	KWS Irina	Mo	0.795	2.589	3.88	0.677	7.803
BBCH 50-52	2020	KWS Irina	Mo	0.815	2.918	4.412	0.696	8.961
BBCH 50-52	2020	KWS Irina	Mo	0.809	2.488	4.232	0.69	7.263
BBCH 50-52	2020	KWS Irina	Mo	0.806	2.857	4.143	0.692	8.19
BBCH 50-52	2020	KWS Irina	Mo	0.81	2.281	4.268	0.663	7.449
BBCH 50-52	2020	KWS Irina	Mo	0.805	2.8	4.117	0.702	8.097
BBCH 50-52	2020	KWS Irina	Mo	0.813	3.125	4.335	0.725	9.816
BBCH 50-52	2020	KWS Irina	Mo	0.819	3.369	4.534	0.731	9.164
BBCH 50-52	2020	KWS Irina	Mo	0.814	2.891	4.384	0.706	8.948
BBCH 50-52	2020	KWS Irina	Zn	0.822	3.02	3.99	0.7	7.99
BBCH 50-52	2020	KWS Irina	Zn	0.798	2.441	4.252	0.696	8.23
BBCH 50-52	2020	KWS Irina	Zn	0.799	2.3	4.336	0.666	8.474
BBCH 50-52	2020	KWS Irina	Zn	0.802	3.23	4.575	0.711	8.562
BBCH 50-52	2020	KWS Irina	Zn	0.802	3.077	4.662	0.702	9.112
BBCH 50-52	2020	KWS Irina	Zn	0.818	2.662	4.29	0.694	9.058
BBCH 50-52	2020	KWS Irina	Zn	0.814	2.702	4.11	0.699	8.475
BBCH 50-52	2020	KWS Irina	Zn	0.822	2.55	3.931	0.682	8.341
BBCH 50-52	2020	KWS Irina	Zn	0.802	2.597	4.04	0.683	7.166
BBCH 50-52	2020	KWS Irina	Zn	0.81	3.107	4.253	0.721	9.525
BBCH 50-52	2020	KWS Irina	Zn	0.813	2.376	3.842	0.683	8.233
BBCH 50-52	2020	KWS Irina	Zn	0.807	2.581	4.458	0.681	7.838
BBCH 50-52	2020	KWS Irina	Zn	0.799	2.526	3.963	0.674	8.746
BBCH 50-52	2020	KWS Irina	Zn	0.815	2.722	4.391	0.695	8.308
BBCH 50-52	2020	KWS Irina	Zn	0.814	3.03	4.38	0.712	9.442
BBCH 50-52	2020	KWS Irina	Zn	0.813	2.469	4.36	0.678	8.295
BBCH 50-52	2020	KWS Irina	Zn	0.818	3.099	4.506	0.71	9.914
BBCH 50-52	2020	KWS Irina	Zn	0.805	2.302	4.137	0.658	7.266
BBCH 50-52	2020	KWS Irina	Zn	0.821	3.317	4.597	0.728	9.094
BBCH 50-52	2020	KWS Irina	Zn	0.809	2.845	4.232	0.705	8.488
BBCH 50-52	2020	RGT Planet	control	0.788	3.331	3.252	0.711	9.02
BBCH 50-52	2020	RGT Planet	control	0.79	3.11	4.61	0.702	8.77
BBCH 50-52	2020	RGT Planet	control	0.801	2.985	3.96	0.711	8.961
BBCH 50-52	2020	RGT Planet	control	0.802	2.887	4.665	0.72	9.11
BBCH 50-52	2020	RGT Planet	control	0.799	3.11	4.741	0.732	8.74
BBCH 50-52	2020	RGT Planet	control	0.814	3.332	4.252	0.733	8.11
BBCH 50-52	2020	RGT Planet	control	0.802	2.992	4.71	0.714	9.02
BBCH 50-52	2020	RGT Planet	control	0.798	3.02	4.412	0.732	8.66
BBCH 50-52	2020	RGT Planet	control	0.802	3.014	4.98	0.733	8.696
BBCH 50-52	2020	RGT Planet	control	0.813	3.142	4.825	0.72	7.474
BBCH 50-52	2020	RGT Planet	control	0.814	3.441	4.811	0.696	8.8
BBCH 50-52	2020	RGT Planet	control	0.788	3.36	4.825	0.73	8.99
BBCH 50-52	2020	RGT Planet	control	0.811	3.452	4.774	0.721	9.02
BBCH 50-52	2020	RGT Planet	control	0.802	3.6	4.925	0.733	8.999
BBCH 50-52	2020	RGT Planet	control	0.803	3.415	4.889	0.702	8.774
BBCH 50-52	2020	RGT Planet	control	0.811	3.25	4.774	0.733	8.102
BBCH 50-52	2020	RGT Planet	control	0.813	3.32	4.742	0.721	8.454
BBCH 50-52	2020	RGT Planet	control	0.789	3.246	4.443	0.722	7.454
BBCH 50-52	2020	RGT Planet	control	0.815	3.021	4.744	0.723	9.259
BBCH 50-52	2020	RGT Planet	control	0.816	3.248	4.945	0.724	9.65
BBCH 50-52	2020	RGT Planet	Cu	0.799	2.02	4.232	0.699	7.452
BBCH 50-52	2020	RGT Planet	Cu	0.77	2.212	4.111	0.69	8.656
BBCH 50-52	2020	RGT Planet	Cu	0.802	2.001	4.442	0.701	8.452
BBCH 50-52	2020	RGT Planet	Cu	0.811	2.33	4.41	0.625	8.652
BBCH 50-52	2020	RGT Planet	Cu	0.8	2.452	4.025	0.679	7.475
BBCH 50-52	2020	RGT Planet	Cu	0.802	2.522	4.441	0.702	7.445
BBCH 50-52	2020	RGT Planet	Cu	0.811	2.441	4.02	0.701	8.012
BBCH 50-52	2020	RGT Planet	Cu	0.83	2.652	4.301	0.666	7.52
BBCH 50-52	2020	RGT Planet	Cu	0.797	2.865	3.493	0.709	7.903
BBCH 50-52	2020	RGT Planet	Cu	0.806	2.624	4.164	0.714	7.797
BBCH 50-52	2020	RGT Planet	Cu	0.817	2.097	4.463	0.656	7.134
BBCH 50-52	2020	RGT Planet	Cu	0.794	2.184	3.859	0.677	7.709
BBCH 50-52	2020	RGT Planet	Cu	0.722	0.806	2.602	0.584	7.224
BBCH 50-52	2020	RGT Planet	Cu	0.828	2.368	4.829	0.705	8.067
BBCH 50-52	2020	RGT Planet	Cu	0.807	2.587	4.169	0.686	7.404
BBCH 50-52	2020	RGT Planet	Cu	0.827	3.255	4.792	0.743	9.583
BBCH 50-52	2020	RGT Planet	Cu	0.807	1.927	4.174	0.684	8.263
BBCH 50-52	2020	RGT Planet	Cu	0.823	2.283	4.636	0.664	8.03
BBCH 50-52	2020	RGT Planet	Cu	0.822	2.331	4.626	0.671	7.236
BBCH 50-52	2020	RGT Planet	Cu	0.83	2.751	4.872	0.694	9.298
BBCH 50-52	2020	RGT Planet	Mn	0.802	2.452	5.11	0.711	7.696
BBCH 50-52	2020	RGT Planet	Mn	0.821	3.232	3.664	0.645	8.11
BBCH 50-52	2020	RGT Planet	Mn	0.811	3.11	3.755	0.721	8.252
BBCH 50-52	2020	RGT Planet	Mn	0.799	2.552	4.441	0.665	7.412
BBCH 50-52	2020	RGT Planet	Mn	0.788	2.602	4.253	0.686	9.021
BBCH 50-52	2020	RGT Planet	Mn	0.823	2.441	4.363	0.692	9.14
BBCH 50-52	2020	RGT Planet	Mn	0.811	2.124	4.712	0.69	8.96
BBCH 50-52	2020	RGT Planet	Mn	0.832	2.662	3.998	0.688	8.887
BBCH 50-52	2020	RGT Planet	Mn	0.819	3.239	4.517	0.733	8.729
BBCH 50-52	2020	RGT Planet	Mn	0.804	2.966	4.104	0.73	8.879
BBCH 50-52	2020	RGT Planet	Mn	0.817	2.976	4.472	0.726	9.667
BBCH 50-52	2020	RGT Planet	Mn	0.804	2.203	4.102	0.658	8.945
BBCH 50-52	2020	RGT Planet	Mn	0.79	1.909	3.754	0.603	7.323
BBCH 50-52	2020	RGT Planet	Mn	0.802	2.828	4.042	0.716	8.186
BBCH 50-52	2020	RGT Planet	Mn	0.811	2.741	4.296	0.711	8.373
BBCH 50-52	2020	RGT Planet	Mn	0.815	2.265	4.395	0.67	8.67
BBCH 50-52	2020	RGT Planet	Mn	0.811	2.09	4.282	0.633	8.667
BBCH 50-52	2020	RGT Planet	Mn	0.817	3.561	4.451	0.75	9.88
BBCH 50-52	2020	RGT Planet	Mn	0.829	2.242	4.837	0.671	7.274
BBCH 50-52	2020	RGT Planet	Mn	0.806	2.536	4.157	0.673	8.091
BBCH 50-52	2020	RGT Planet	Mo	0.788	3.152	4.12	0.699	9.12
BBCH 50-52	2020	RGT Planet	Mo	0.812	2.656	4.69	0.711	9.441
BBCH 50-52	2020	RGT Planet	Mo	0.82	3.452	4.671	0.696	8.798
BBCH 50-52	2020	RGT Planet	Mo	0.813	3.356	3.998	0.667	10.14
BBCH 50-52	2020	RGT Planet	Mo	0.833	2.12	4.214	0.685	8.47
BBCH 50-52	2020	RGT Planet	Mo	0.832	2.012	4.39	0.689	7.895
BBCH 50-52	2020	RGT Planet	Mo	0.798	2.01	4.441	0.702	7.441
BBCH 50-52	2020	RGT Planet	Mo	0.814	1.982	4.69	0.711	7.11
BBCH 50-52	2020	RGT Planet	Mo	0.799	2.536	3.977	0.712	7.179
BBCH 50-52	2020	RGT Planet	Mo	0.806	2.923	4.143	0.721	8.731
BBCH 50-52	2020	RGT Planet	Mo	0.801	2.404	4.027	0.684	8.624
BBCH 50-52	2020	RGT Planet	Mo	0.819	2.669	4.529	0.706	8.54
BBCH 50-52	2020	RGT Planet	Mo	0.814	2.245	4.365	0.676	8.628
BBCH 50-52	2020	RGT Planet	Mo	0.832	2.692	4.94	0.722	9.605
BBCH 50-52	2020	RGT Planet	Mo	0.835	3.82	5.074	0.772	9.235
BBCH 50-52	2020	RGT Planet	Mo	0.803	2.325	4.073	0.66	8.252
BBCH 50-52	2020	RGT Planet	Mo	0.802	1.708	4.052	0.63	7.359
BBCH 50-52	2020	RGT Planet	Mo	0.812	2.741	4.333	0.715	8.497
BBCH 50-52	2020	RGT Planet	Mo	0.824	2.636	4.696	0.706	8.744
BBCH 50-52	2020	RGT Planet	Mo	0.818	2.113	4.486	0.664	8.292
BBCH 50-52	2020	RGT Planet	Zn	0.812	2.853	4.307	0.714	8.779
BBCH 50-52	2020	RGT Planet	Zn	0.786	2.281	3.673	0.668	7.598
BBCH 50-52	2020	RGT Planet	Zn	0.816	2.327	4.448	0.666	6.898
BBCH 50-52	2020	RGT Planet	Zn	0.805	2.238	4.125	0.683	6.305
BBCH 50-52	2020	RGT Planet	Zn	0.805	2.362	4.127	0.688	7.703
BBCH 50-52	2020	RGT Planet	Zn	0.829	2.825	4.839	0.728	9.948
BBCH 50-52	2020	RGT Planet	Zn	0.803	2.732	4.087	0.7	7.81
BBCH 50-52	2020	RGT Planet	Zn	0.811	3.168	4.279	0.729	9.885
BBCH 50-52	2020	RGT Planet	Zn	0.802	2.082	4.041	0.666	7.606
BBCH 50-52	2020	RGT Planet	Zn	0.814	2.61	4.376	0.694	7.927
BBCH 50-52	2020	RGT Planet	Zn	0.83	2.449	4.884	0.686	8.209
BBCH 50-52	2020	RGT Planet	Zn	0.826	2.056	4.748	0.664	7.48
BBCH 50-52	2020	RGT Planet	Zn	0.802	3.12	5.11	0.701	7.882
BBCH 50-52	2020	RGT Planet	Zn	0.799	2.14	4.124	0.7	8.125
BBCH 50-52	2020	RGT Planet	Zn	0.811	2.25	4.225	0.699	8.33
BBCH 50-52	2020	RGT Planet	Zn	0.811	2.41	4.03	0.687	7.99
BBCH 50-52	2020	RGT Planet	Zn	0.815	2.551	3.985	0.688	7.989
BBCH 50-52	2020	RGT Planet	Zn	0.812	3.125	3.989	0.702	7.666
BBCH 50-52	2020	RGT Planet	Zn	0.814	2.685	4.447	0.669	8.111
BBCH 50-52	2020	RGT Planet	Zn	0.82	2.566	4.658	0.69	8.03
BBCH 50-52	2021	Baryłka	control	0.785	3.142	4.625	0.744	9.745
BBCH 50-52	2021	Baryłka	control	0.788	4.025	4.602	0.705	10.12
BBCH 50-52	2021	Baryłka	control	0.802	3.754	3.923	0.722	9.852
BBCH 50-52	2021	Baryłka	control	0.799	2.771	3.028	0.713	9.47
BBCH 50-52	2021	Baryłka	control	0.811	2.858	4.441	0.744	8.652
BBCH 50-52	2021	Baryłka	control	0.802	3.412	4.68	0.701	8.778
BBCH 50-52	2021	Baryłka	control	0.804	3.014	4.771	0.714	9.015
BBCH 50-52	2021	Baryłka	control	0.806	2.745	4.85	0.708	9.02
BBCH 50-52	2021	Baryłka	control	0.811	2.984	4.669	0.714	9.986
BBCH 50-52	2021	Baryłka	control	0.799	3.455	4.828	0.715	9.674
BBCH 50-52	2021	Baryłka	control	0.806	3.33	4.765	0.72	9.887
BBCH 50-52	2021	Baryłka	control	0.804	3.142	4.447	0.719	10.4
BBCH 50-52	2021	Baryłka	control	0.814	3.34	5.001	0.721	9.66
BBCH 50-52	2021	Baryłka	control	0.819	3.283	4.701	0.722	9.551
BBCH 50-52	2021	Baryłka	control	0.806	3.347	4.85	0.719	9.387
BBCH 50-52	2021	Baryłka	control	0.814	3.39	4.779	0.72	9.552
BBCH 50-52	2021	Baryłka	control	0.799	3.452	4.952	0.7	9.78
BBCH 50-52	2021	Baryłka	control	0.8	3.212	4.264	0.722	8.766
BBCH 50-52	2021	Baryłka	control	0.798	3.122	3.95	0.719	8.862
BBCH 50-52	2021	Baryłka	control	0.839	3.342	5.207	0.736	10.8
BBCH 50-52	2021	Baryłka	Cu	0.814	3.441	5.12	0.747	11.14
BBCH 50-52	2021	Baryłka	Cu	0.822	3.771	4.785	0.755	11.98
BBCH 50-52	2021	Baryłka	Cu	0.814	3.52	4.558	0.722	11.075
BBCH 50-52	2021	Baryłka	Cu	0.83	3.985	4.332	0.721	12.047
BBCH 50-52	2021	Baryłka	Cu	0.815	3.777	4.72	0.714	13.14
BBCH 50-52	2021	Baryłka	Cu	0.802	4.01	4.552	0.735	12.885
BBCH 50-52	2021	Baryłka	Cu	0.83	3.114	4.899	0.74	12.922
BBCH 50-52	2021	Baryłka	Cu	0.825	2.875	5.214	0.736	11.42
BBCH 50-52	2021	Baryłka	Cu	0.84	3.317	5.251	0.714	12.439
BBCH 50-52	2021	Baryłka	Cu	0.831	3.081	4.931	0.696	11.577
BBCH 50-52	2021	Baryłka	Cu	0.829	3.649	4.844	0.74	13.089
BBCH 50-52	2021	Baryłka	Cu	0.818	2.718	4.488	0.7	11.541
BBCH 50-52	2021	Baryłka	Cu	0.822	3.283	4.629	0.747	11.35
BBCH 50-52	2021	Baryłka	Cu	0.838	3.957	5.187	0.765	11.702
BBCH 50-52	2021	Baryłka	Cu	0.822	3.768	4.612	0.744	12.929
BBCH 50-52	2021	Baryłka	Cu	0.811	3.275	4.297	0.721	10.141
BBCH 50-52	2021	Baryłka	Cu	0.83	4.169	4.894	0.758	12.473
BBCH 50-52	2021	Baryłka	Cu	0.829	3.849	4.842	0.749	13.962
BBCH 50-52	2021	Baryłka	Cu	0.825	4.242	4.704	0.759	12.154
BBCH 50-52	2021	Baryłka	Cu	0.823	3.356	4.651	0.721	11.251
BBCH 50-52	2021	Baryłka	Mn	0.822	3.52	5.02	0.755	11.414
BBCH 50-52	2021	Baryłka	Mn	0.811	4.011	5.523	0.745	11.61
BBCH 50-52	2021	Baryłka	Mn	0.832	3.899	4.252	0.708	12.052
BBCH 50-52	2021	Baryłka	Mn	0.814	4.02	4.11	0.71	12.023
BBCH 50-52	2021	Baryłka	Mn	0.832	3.352	4.852	0.751	11.898
BBCH 50-52	2021	Baryłka	Mn	0.812	3.441	5.02	0.772	12.98
BBCH 50-52	2021	Baryłka	Mn	0.823	3.17	4.874	0.721	12.778
BBCH 50-52	2021	Baryłka	Mn	0.831	3.699	4.809	0.737	12.855
BBCH 50-52	2021	Baryłka	Mn	0.823	3.298	4.64	0.727	11.126
BBCH 50-52	2021	Baryłka	Mn	0.82	3.615	4.564	0.753	12.415
BBCH 50-52	2021	Baryłka	Mn	0.807	3.309	4.182	0.733	11.141
BBCH 50-52	2021	Baryłka	Mn	0.831	3.529	4.907	0.736	12.747
BBCH 50-52	2021	Baryłka	Mn	0.825	3.442	4.719	0.734	11.923
BBCH 50-52	2021	Baryłka	Mn	0.827	3.585	4.779	0.758	12.994
BBCH 50-52	2021	Baryłka	Mn	0.859	5.784	6.078	0.824	12.951
BBCH 50-52	2021	Baryłka	Mn	0.833	4.056	5.003	0.756	13.347
BBCH 50-52	2021	Baryłka	Mn	0.824	3.64	4.681	0.734	12.509
BBCH 50-52	2021	Baryłka	Mn	0.83	3.419	4.87	0.709	11.801
BBCH 50-52	2021	Baryłka	Mn	0.831	3.375	4.905	0.71	11.749
BBCH 50-52	2021	Baryłka	Mn	0.813	2.614	4.355	0.673	11.66
BBCH 50-52	2021	Baryłka	Mo	0.82	3.33	4.648	0.732	10.452
BBCH 50-52	2021	Baryłka	Mo	0.831	3.245	4.47	0.702	10.474
BBCH 50-52	2021	Baryłka	Mo	0.825	2.985	4.985	0.73	12.132
BBCH 50-52	2021	Baryłka	Mo	0.824	3.66	5.21	0.755	12.522
BBCH 50-52	2021	Baryłka	Mo	0.811	4.025	5.02	0.725	13.02
BBCH 50-52	2021	Baryłka	Mo	0.804	4	4.19	0.758	13.147
BBCH 50-52	2021	Baryłka	Mo	0.83	3.32	4.22	0.732	12.02
BBCH 50-52	2021	Baryłka	Mo	0.829	3.225	4.424	0.72	11.99
BBCH 50-52	2021	Baryłka	Mo	0.825	3.555	4.719	0.737	12.364
BBCH 50-52	2021	Baryłka	Mo	0.827	2.852	4.792	0.705	10.632
BBCH 50-52	2021	Baryłka	Mo	0.83	3.755	4.873	0.749	12.7
BBCH 50-52	2021	Baryłka	Mo	0.794	2.898	3.846	0.711	10.921
BBCH 50-52	2021	Baryłka	Mo	0.834	3.548	5.036	0.757	13.534
BBCH 50-52	2021	Baryłka	Mo	0.839	3.776	5.197	0.744	11.595
BBCH 50-52	2021	Baryłka	Mo	0.842	4.248	5.316	0.763	13.238
BBCH 50-52	2021	Baryłka	Mo	0.819	2.928	4.528	0.694	11.199
BBCH 50-52	2021	Baryłka	Mo	0.808	2.913	4.215	0.704	10.639
BBCH 50-52	2021	Baryłka	Mo	0.818	3.517	4.501	0.732	11.58
BBCH 50-52	2021	Baryłka	Mo	0.807	3.993	4.179	0.768	12.823
BBCH 50-52	2021	Baryłka	Mo	0.821	3.705	4.578	0.731	12.406
BBCH 50-52	2021	Baryłka	Zn	0.822	3.41	4.422	0.731	11.42
BBCH 50-52	2021	Baryłka	Zn	0.831	3.523	4.82	0.702	11.68
BBCH 50-52	2021	Baryłka	Zn	0.828	3.421	5.214	0.741	12.14
BBCH 50-52	2021	Baryłka	Zn	0.819	3.22	4.325	0.735	10.54
BBCH 50-52	2021	Baryłka	Zn	0.817	4.02	4.124	0.722	10.996
BBCH 50-52	2021	Baryłka	Zn	0.821	2.998	4.752	0.744	11.252
BBCH 50-52	2021	Baryłka	Zn	0.82	3.011	4.521	0.745	11.89
BBCH 50-52	2021	Baryłka	Zn	0.819	3.756	4.794	0.702	12.432
BBCH 50-52	2021	Baryłka	Zn	0.815	2.798	4.394	0.701	10.616
BBCH 50-52	2021	Baryłka	Zn	0.841	3.727	5.278	0.74	12.549
BBCH 50-52	2021	Baryłka	Zn	0.831	3.46	4.903	0.731	12.398
BBCH 50-52	2021	Baryłka	Zn	0.8	2.578	4.008	0.682	11.046
BBCH 50-52	2021	Baryłka	Zn	0.827	3.126	4.766	0.701	10.445
BBCH 50-52	2021	Baryłka	Zn	0.833	3.08	4.989	0.721	11.079
BBCH 50-52	2021	Baryłka	Zn	0.817	2.987	4.466	0.698	10.308
BBCH 50-52	2021	Baryłka	Zn	0.829	4.714	4.832	0.78	12.777
BBCH 50-52	2021	Baryłka	Zn	0.828	4.028	4.809	0.753	12.587
BBCH 50-52	2021	Baryłka	Zn	0.782	2.978	3.584	0.726	10.751
BBCH 50-52	2021	Baryłka	Zn	0.839	3.712	5.222	0.716	11.884
BBCH 50-52	2021	Baryłka	Zn	0.805	3.846	4.139	0.764	12.162
BBCH 50-52	2021	KWS Irina	control	0.782	3.142	3.331	0.711	10.15
BBCH 50-52	2021	KWS Irina	control	0.758	2.421	2.878	0.701	9.11
BBCH 50-52	2021	KWS Irina	control	0.799	2.685	2.914	0.699	8.445
BBCH 50-52	2021	KWS Irina	control	0.802	2.847	2.787	0.702	8.141
BBCH 50-52	2021	KWS Irina	control	0.801	3.02	3.142	0.688	8.136
BBCH 50-52	2021	KWS Irina	control	0.799	2.14	3.32	0.696	8.665
BBCH 50-52	2021	KWS Irina	control	0.751	2.22	4.252	0.656	8.212
BBCH 50-52	2021	KWS Irina	control	0.752	1.889	4.14	0.711	7.142
BBCH 50-52	2021	KWS Irina	control	0.822	1.914	4.235	0.666	7.541
BBCH 50-52	2021	KWS Irina	control	0.805	1.77	3.745	0.697	7.445
BBCH 50-52	2021	KWS Irina	control	0.744	2.252	3.88	0.699	7.368
BBCH 50-52	2021	KWS Irina	control	0.738	1.774	2.654	0.711	8.325
BBCH 50-52	2021	KWS Irina	control	0.751	1.745	2.232	0.702	8.441
BBCH 50-52	2021	KWS Irina	control	0.73	1.801	2.825	0.696	8.4
BBCH 50-52	2021	KWS Irina	control	0.724	1.744	2.323	0.695	8.474
BBCH 50-52	2021	KWS Irina	control	0.725	1.774	2.731	0.699	8.994
BBCH 50-52	2021	KWS Irina	control	0.729	1.825	2.691	0.708	8.48
BBCH 50-52	2021	KWS Irina	control	0.73	1.844	2.764	0.699	7.987
BBCH 50-52	2021	KWS Irina	control	0.794	2.12	3.011	0.677	8.452
BBCH 50-52	2021	KWS Irina	control	0.813	2.757	4.357	0.697	8.376
BBCH 50-52	2021	KWS Irina	Cu	0.814	3.14	5.12	0.71	10.122
BBCH 50-52	2021	KWS Irina	Cu	0.832	3.25	4.323	0.721	9.775
BBCH 50-52	2021	KWS Irina	Cu	0.822	3.441	4.121	0.688	9.454
BBCH 50-52	2021	KWS Irina	Cu	0.814	2.989	4.222	0.695	10.114
BBCH 50-52	2021	KWS Irina	Cu	0.82	3.012	4.785	0.711	10.12
BBCH 50-52	2021	KWS Irina	Cu	0.813	3.001	4.688	0.721	10.11
BBCH 50-52	2021	KWS Irina	Cu	0.819	2.989	4.332	0.711	9.445
BBCH 50-52	2021	KWS Irina	Cu	0.818	3.234	4.711	0.721	9.812
BBCH 50-52	2021	KWS Irina	Cu	0.817	3.087	4.464	0.722	9.752
BBCH 50-52	2021	KWS Irina	Cu	0.829	3.711	4.842	0.744	10.362
BBCH 50-52	2021	KWS Irina	Cu	0.828	2.854	4.815	0.677	9.51
BBCH 50-52	2021	KWS Irina	Cu	0.822	3.218	4.306	0.734	10.173
BBCH 50-52	2021	KWS Irina	Cu	0.811	1.95	3.866	0.623	8.694
BBCH 50-52	2021	KWS Irina	Cu	0.836	4.014	5.111	0.767	12.745
BBCH 50-52	2021	KWS Irina	Cu	0.825	3.62	4.406	0.747	11.921
BBCH 50-52	2021	KWS Irina	Cu	0.813	3.091	4.334	0.72	9.65
BBCH 50-52	2021	KWS Irina	Cu	0.798	2.418	4.398	0.67	7.127
BBCH 50-52	2021	KWS Irina	Cu	0.813	2.718	4.355	0.68	8.046
BBCH 50-52	2021	KWS Irina	Cu	0.819	2.964	4.853	0.676	9.724
BBCH 50-52	2021	KWS Irina	Cu	0.825	3.981	4.71	0.748	11.024
BBCH 50-52	2021	KWS Irina	Mn	0.812	3.123	4.502	0.711	8.882
BBCH 50-52	2021	KWS Irina	Mn	0.799	3.352	4.55	0.72	10.21
BBCH 50-52	2021	KWS Irina	Mn	0.844	3.212	4.325	0.714	11.052
BBCH 50-52	2021	KWS Irina	Mn	0.832	2.999	4.022	0.722	11.02
BBCH 50-52	2021	KWS Irina	Mn	0.822	2.785	5.11	0.723	9.02
BBCH 50-52	2021	KWS Irina	Mn	0.811	3.142	4.645	0.732	10.114
BBCH 50-52	2021	KWS Irina	Mn	0.813	3.11	4.55	0.714	10.02
BBCH 50-52	2021	KWS Irina	Mn	0.799	3.142	4.123	0.701	10.332
BBCH 50-52	2021	KWS Irina	Mn	0.823	3.152	4.662	0.71	10.429
BBCH 50-52	2021	KWS Irina	Mn	0.839	3.179	5.213	0.72	11.937
BBCH 50-52	2021	KWS Irina	Mn	0.827	3.303	4.79	0.727	11.494
BBCH 50-52	2021	KWS Irina	Mn	0.812	2.91	4.311	0.714	8.961
BBCH 50-52	2021	KWS Irina	Mn	0.799	3.026	3.906	0.73	8.624
BBCH 50-52	2021	KWS Irina	Mn	0.821	3.219	4.304	0.736	10.195
BBCH 50-52	2021	KWS Irina	Mn	0.825	3.648	4.715	0.749	10.886
BBCH 50-52	2021	KWS Irina	Mn	0.828	2.996	4.812	0.705	10.166
BBCH 50-52	2021	KWS Irina	Mn	0.824	3.35	4.679	0.716	11.217
BBCH 50-52	2021	KWS Irina	Mn	0.797	2.451	3.7	0.673	8.101
BBCH 50-52	2021	KWS Irina	Mn	0.804	3.234	4.103	0.721	9.566
BBCH 50-52	2021	KWS Irina	Mn	0.812	2.742	4.568	0.693	8.687
BBCH 50-52	2021	KWS Irina	Mo	0.819	2.803	4.524	0.681	8.631
BBCH 50-52	2021	KWS Irina	Mo	0.811	2.908	4.903	0.7	9.983
BBCH 50-52	2021	KWS Irina	Mo	0.829	3.21	4.857	0.717	11.173
BBCH 50-52	2021	KWS Irina	Mo	0.809	2.913	4.236	0.722	9.911
BBCH 50-52	2021	KWS Irina	Mo	0.813	2.728	4.336	0.706	9.349
BBCH 50-52	2021	KWS Irina	Mo	0.828	2.695	4.808	0.705	9.13
BBCH 50-52	2021	KWS Irina	Mo	0.826	3.421	4.161	0.719	10.237
BBCH 50-52	2021	KWS Irina	Mo	0.808	2.787	4.205	0.692	8.112
BBCH 50-52	2021	KWS Irina	Mo	0.829	2.956	4.839	0.696	9.951
BBCH 50-52	2021	KWS Irina	Mo	0.82	3.901	4.545	0.75	11.295
BBCH 50-52	2021	KWS Irina	Mo	0.824	3.553	4.667	0.728	12.066
BBCH 50-52	2021	KWS Irina	Mo	0.818	3.069	4.207	0.705	9.101
BBCH 50-52	2021	KWS Irina	Mo	0.82	3.2	4.322	0.722	10.22
BBCH 50-52	2021	KWS Irina	Mo	0.819	2.889	5.012	0.705	11.256
BBCH 50-52	2021	KWS Irina	Mo	0.821	2.919	4.985	0.71	9.887
BBCH 50-52	2021	KWS Irina	Mo	0.822	3.011	4.441	0.718	9.994
BBCH 50-52	2021	KWS Irina	Mo	0.819	3.212	4.323	0.708	9.124
BBCH 50-52	2021	KWS Irina	Mo	0.817	3.334	4.001	0.699	8.967
BBCH 50-52	2021	KWS Irina	Mo	0.814	3.25	4.553	0.705	8.665
BBCH 50-52	2021	KWS Irina	Mo	0.82	2.899	4.574	0.72	11.245
BBCH 50-52	2021	KWS Irina	Zn	0.822	3.12	4.885	0.722	12.02
BBCH 50-52	2021	KWS Irina	Zn	0.83	3.552	4.656	0.721	11.878
BBCH 50-52	2021	KWS Irina	Zn	0.832	3.432	4.445	0.723	11.688
BBCH 50-52	2021	KWS Irina	Zn	0.811	4.532	4.323	0.714	12.025
BBCH 50-52	2021	KWS Irina	Zn	0.824	3.142	4.656	0.754	12.32
BBCH 50-52	2021	KWS Irina	Zn	0.826	3.441	5.114	0.728	12.001
BBCH 50-52	2021	KWS Irina	Zn	0.844	2.985	4.887	0.711	11.998
BBCH 50-52	2021	KWS Irina	Zn	0.822	3.341	4.721	0.721	11.77
BBCH 50-52	2021	KWS Irina	Zn	0.829	3.359	4.838	0.713	11.593
BBCH 50-52	2021	KWS Irina	Zn	0.821	4.266	4.597	0.763	10.965
BBCH 50-52	2021	KWS Irina	Zn	0.823	3.913	4.984	0.762	10.864
BBCH 50-52	2021	KWS Irina	Zn	0.834	3.479	4.682	0.745	12.138
BBCH 50-52	2021	KWS Irina	Zn	0.825	2.906	4.724	0.715	10.811
BBCH 50-52	2021	KWS Irina	Zn	0.815	2.795	4.581	0.692	10.864
BBCH 50-52	2021	KWS Irina	Zn	0.818	3.217	4.498	0.727	10.524
BBCH 50-52	2021	KWS Irina	Zn	0.82	3.316	4.364	0.722	11.445
BBCH 50-52	2021	KWS Irina	Zn	0.83	3.84	4.898	0.756	12.226
BBCH 50-52	2021	KWS Irina	Zn	0.83	4.393	4.898	0.763	12.426
BBCH 50-52	2021	KWS Irina	Zn	0.821	1.983	4.293	0.636	12.412
BBCH 50-52	2021	KWS Irina	Zn	0.838	3.695	5.164	0.729	13.914
BBCH 50-52	2021	RGT Planet	control	0.802	2.025	4.202	0.714	9.121
BBCH 50-52	2021	RGT Planet	control	0.811	3.11	4.16	0.705	9.141
BBCH 50-52	2021	RGT Planet	control	0.799	3.215	4.225	0.704	8.452
BBCH 50-52	2021	RGT Planet	control	0.802	3.142	4.17	0.699	8.451
BBCH 50-52	2021	RGT Planet	control	0.807	2.828	3.98	0.702	7.898
BBCH 50-52	2021	RGT Planet	control	0.815	2.557	4.212	0.711	9.11
BBCH 50-52	2021	RGT Planet	control	0.808	2.441	4.585	0.696	9.235
BBCH 50-52	2021	RGT Planet	control	0.815	2.552	3.998	0.689	9.124
BBCH 50-52	2021	RGT Planet	control	0.814	2.874	3.989	0.702	9.333
BBCH 50-52	2021	RGT Planet	control	0.802	3.021	4.142	0.711	8.559
BBCH 50-52	2021	RGT Planet	control	0.807	3.002	4.235	0.714	8.745
BBCH 50-52	2021	RGT Planet	control	0.808	3.225	4.212	0.722	9.452
BBCH 50-52	2021	RGT Planet	control	0.806	2.78	4.228	0.721	9.552
BBCH 50-52	2021	RGT Planet	control	0.805	2.882	4.235	0.722	8.89
BBCH 50-52	2021	RGT Planet	control	0.811	2.774	4.444	0.708	8.902
BBCH 50-52	2021	RGT Planet	control	0.812	2.822	3.997	0.708	8.802
BBCH 50-52	2021	RGT Planet	control	0.802	2.757	3.93	0.721	8.808
BBCH 50-52	2021	RGT Planet	control	0.799	2.665	4.02	0.699	7.842
BBCH 50-52	2021	RGT Planet	control	0.816	2.874	4.123	0.711	9.214
BBCH 50-52	2021	RGT Planet	control	0.814	2.994	4.673	0.703	9.839
BBCH 50-52	2021	RGT Planet	Cu	0.82	3.125	4.821	0.665	10.52
BBCH 50-52	2021	RGT Planet	Cu	0.83	3.202	4.778	0.676	9.774
BBCH 50-52	2021	RGT Planet	Cu	0.814	3.108	4.785	0.684	9.212
BBCH 50-52	2021	RGT Planet	Cu	0.824	2.774	4.777	0.692	8.556
BBCH 50-52	2021	RGT Planet	Cu	0.83	2.686	5.021	0.688	8.676
BBCH 50-52	2021	RGT Planet	Cu	0.831	2.452	4.789	0.684	9.892
BBCH 50-52	2021	RGT Planet	Cu	0.833	2.552	4.675	0.699	10.125
BBCH 50-52	2021	RGT Planet	Cu	0.825	2.356	4.665	0.701	9.798
BBCH 50-52	2021	RGT Planet	Cu	0.817	2.843	4.475	0.689	9.762
BBCH 50-52	2021	RGT Planet	Cu	0.816	2.415	4.739	0.647	8.405
BBCH 50-52	2021	RGT Planet	Cu	0.827	2.348	4.777	0.646	10.24
BBCH 50-52	2021	RGT Planet	Cu	0.812	2.411	5.349	0.659	9.498
BBCH 50-52	2021	RGT Planet	Cu	0.813	2.841	4.352	0.692	8.552
BBCH 50-52	2021	RGT Planet	Cu	0.823	2.81	4.665	0.677	8.872
BBCH 50-52	2021	RGT Planet	Cu	0.826	2.811	4.733	0.695	9.245
BBCH 50-52	2021	RGT Planet	Cu	0.832	2.889	4.949	0.709	10.138
BBCH 50-52	2021	RGT Planet	Cu	0.83	2.538	4.894	0.662	9.223
BBCH 50-52	2021	RGT Planet	Cu	0.834	3.102	4.689	0.716	10.412
BBCH 50-52	2021	RGT Planet	Cu	0.833	3.112	4.642	0.71	10.254
BBCH 50-52	2021	RGT Planet	Cu	0.838	3.317	5.184	0.713	10.262
BBCH 50-52	2021	RGT Planet	Mn	0.822	2.99	5.221	0.701	9.142
BBCH 50-52	2021	RGT Planet	Mn	0.817	3.021	5.212	0.669	10.845
BBCH 50-52	2021	RGT Planet	Mn	0.83	3.41	5.002	0.689	10.412
BBCH 50-52	2021	RGT Planet	Mn	0.827	2.774	4.774	0.714	8.989
BBCH 50-52	2021	RGT Planet	Mn	0.828	2.766	4.875	0.694	10.424
BBCH 50-52	2021	RGT Planet	Mn	0.82	2.941	3.998	0.699	9.142
BBCH 50-52	2021	RGT Planet	Mn	0.82	2.222	4.221	0.672	8.454
BBCH 50-52	2021	RGT Planet	Mn	0.799	2.991	4.201	0.701	8.142
BBCH 50-52	2021	RGT Planet	Mn	0.799	1.953	5.025	0.602	7.91
BBCH 50-52	2021	RGT Planet	Mn	0.817	2.384	4.186	0.654	8.531
BBCH 50-52	2021	RGT Planet	Mn	0.828	2.746	5.159	0.669	9.471
BBCH 50-52	2021	RGT Planet	Mn	0.835	3.435	5.056	0.724	10.573
BBCH 50-52	2021	RGT Planet	Mn	0.799	2.623	4.558	0.662	7.916
BBCH 50-52	2021	RGT Planet	Mn	0.832	3.228	4.954	0.706	10.285
BBCH 50-52	2021	RGT Planet	Mn	0.834	3.175	5.04	0.718	10.486
BBCH 50-52	2021	RGT Planet	Mn	0.83	2.881	4.88	0.686	9.647
BBCH 50-52	2021	RGT Planet	Mn	0.829	3.388	4.52	0.733	10.223
BBCH 50-52	2021	RGT Planet	Mn	0.82	2.943	4.569	0.687	9.24
BBCH 50-52	2021	RGT Planet	Mn	0.825	3.424	3.864	0.787	10.418
BBCH 50-52	2021	RGT Planet	Mn	0.814	2.513	4.374	0.695	8.635
BBCH 50-52	2021	RGT Planet	Mo	0.832	4.114	5.012	0.701	11.125
BBCH 50-52	2021	RGT Planet	Mo	0.821	3.552	5.111	0.699	12.445
BBCH 50-52	2021	RGT Planet	Mo	0.832	3.124	4.98	0.688	10.222
BBCH 50-52	2021	RGT Planet	Mo	0.833	3.621	4.566	0.714	13.142
BBCH 50-52	2021	RGT Planet	Mo	0.822	4.142	4.552	0.722	13.254
BBCH 50-52	2021	RGT Planet	Mo	0.837	3.878	5.121	0.744	13.002
BBCH 50-52	2021	RGT Planet	Mo	0.84	3.221	5.112	0.765	13.245
BBCH 50-52	2021	RGT Planet	Mo	0.831	3.211	4.902	0.755	12.445
BBCH 50-52	2021	RGT Planet	Mo	0.83	2.514	4.876	0.664	11.137
BBCH 50-52	2021	RGT Planet	Mo	0.849	4.231	5.625	0.761	13.111
BBCH 50-52	2021	RGT Planet	Mo	0.818	3.247	4.481	0.748	10.881
BBCH 50-52	2021	RGT Planet	Mo	0.848	5.282	5.574	0.812	14.905
BBCH 50-52	2021	RGT Planet	Mo	0.822	3.164	4.624	0.708	10.352
BBCH 50-52	2021	RGT Planet	Mo	0.828	3.215	5.177	0.717	11.927
BBCH 50-52	2021	RGT Planet	Mo	0.837	3.646	4.784	0.741	12.918
BBCH 50-52	2021	RGT Planet	Mo	0.832	4.369	4.939	0.769	12.591
BBCH 50-52	2021	RGT Planet	Mo	0.824	2.834	4.114	0.714	11.327
BBCH 50-52	2021	RGT Planet	Mo	0.836	3.331	5.092	0.737	12.506
BBCH 50-52	2021	RGT Planet	Mo	0.826	4.059	4.423	0.774	13.888
BBCH 50-52	2021	RGT Planet	Mo	0.821	3.373	5.279	0.722	12.857
BBCH 50-52	2021	RGT Planet	Zn	0.811	3.111	4.744	0.711	10.12
BBCH 50-52	2021	RGT Planet	Zn	0.822	2.989	4.552	0.689	9.899
BBCH 50-52	2021	RGT Planet	Zn	0.834	2.664	4.213	0.711	9.78
BBCH 50-52	2021	RGT Planet	Zn	0.833	2.744	4.221	0.677	8.212
BBCH 50-52	2021	RGT Planet	Zn	0.822	2.922	5.02	0.702	8.745
BBCH 50-52	2021	RGT Planet	Zn	0.818	2.774	4.879	0.696	11.025
BBCH 50-52	2021	RGT Planet	Zn	0.82	2.865	4.992	0.675	10.452
BBCH 50-52	2021	RGT Planet	Zn	0.821	2.877	4.885	0.692	10.785
BBCH 50-52	2021	RGT Planet	Zn	0.814	2.785	4.743	0.668	9.823
BBCH 50-52	2021	RGT Planet	Zn	0.822	2.901	4.947	0.694	9.965
BBCH 50-52	2021	RGT Planet	Zn	0.799	2.155	4.31	0.646	7.001
BBCH 50-52	2021	RGT Planet	Zn	0.838	2.787	5.164	0.686	9.878
BBCH 50-52	2021	RGT Planet	Zn	0.839	3.722	5.204	0.747	11.472
BBCH 50-52	2021	RGT Planet	Zn	0.817	2.93	4.479	0.707	9.272
BBCH 50-52	2021	RGT Planet	Zn	0.81	1.936	4.274	0.62	8.129
BBCH 50-52	2021	RGT Planet	Zn	0.812	2.445	4.05	0.666	9.597
BBCH 50-52	2021	RGT Planet	Zn	0.829	2.883	4.851	0.696	9.74
BBCH 50-52	2021	RGT Planet	Zn	0.835	3.517	4.561	0.746	11.96
BBCH 50-52	2021	RGT Planet	Zn	0.83	3.154	4.881	0.714	10.993
BBCH 50-52	2021	RGT Planet	Zn	0.823	3.204	4.639	0.726	10.791
